# Supplementary material for: Tricky but repeatable synthetic approach to branched, multifunctional silsesquioxane dendrimer derivatives
Source: Royal Society of Chemistry journal article supplement (doi:10.1039/d3qi00500c), 2023-01-01
Supplement: d3qi00500c1.pdf [file d3qi00500c1.pdf]

*Supporting Information for*

**Tricky but repeatable synthetic approach to branched, multifunctional silsesquioxane dendrimer derivatives**

Aleksandra Mrzygłód,<sup>a,b</sup> Rafał Januszewski,<sup>a,b</sup> Julia Duszczyk,<sup>a,b</sup>  
Michał Dutkiweicz,<sup>c</sup> Maciej Kubicki,<sup>a</sup> Beata Dudziec\*<sup>a,b</sup>

<sup>a</sup>*Faculty of Chemistry, Adam Mickiewicz University in Poznan, Uniwersytetu Poznańskiego 8, 61-614 Poznan, Poland. E-mail: [beata.dudziec@gmail.com](mailto:beata.dudziec@gmail.com)*

<sup>b</sup>*Centre for Advanced Technologies, Adam Mickiewicz University in Poznan, Uniwersytetu Poznańskiego 10, 61-614 Poznan, Poland*

<sup>c</sup>*Adam Mickiewicz University Foundation, Poznan Science and Technology Park, Rubież 46, 61-612 Poznan, Poland*

**Table of contents:**

|    |                                                                                                                                           |        |
|----|-------------------------------------------------------------------------------------------------------------------------------------------|--------|
| 1. | General Considerations.....                                                                                                               | S -2-  |
| 2. | Measurements .....                                                                                                                        | S -2-  |
| 3. | Synthetic procedures .....                                                                                                                | S -4-  |
| 4. | Table of isolated compounds.....                                                                                                          | S -7-  |
| 5. | Characterization data of the obtained products ( <sup>1</sup> H, <sup>13</sup> C, <sup>29</sup> Si NMR spectra and IR spectroscopy) ..... | S -11- |
| 6. | Additional information and NMR spectra.....                                                                                               | S -44- |
| 7. | References.....                                                                                                                           | S -54- |

## 1. General Considerations

The chemicals were purchased from the following sources: Sigma-Aldrich for toluene, tetrahydrofuran (THF), *n*-hexane, acetonitrile, methanol, dichloromethane, chloroform, chloroform-*d*, sodium bis(2-methoxyethoxy)aluminum hydride solution, dichloromethylsilane, dichloromethylvinylsilane, allyl glycidyl ether, 1-octene, Karstedt's catalyst – 2% xylene solution; TCI for chlorodimethylsilane; ABCR for trichlorosilane and lithium aluminium hydride; UNISIL for octavinylspherosilicate; Fluka Honeywell for celite. Following silsesquioxanes: iBuT<sub>8</sub>-OSiVi, iBuT<sub>8</sub>-OSiH, iBuT<sub>8</sub>-Vi, PhT<sub>8</sub>-Vi, DDSQ-2SiVi, DDSQ-4OSiVi, were prepared according to the literature procedure.<sup>1-4</sup> All solvents were dried over CaH<sub>2</sub> prior to use and stored under argon over 4Å molecular sieves. All liquid substrates were also dried and degassed by bulb-to-bulb distillation. All syntheses were conducted under an argon atmosphere using standard Schlenk-line and vacuum techniques.

## 2. Measurements

### Nuclear Magnetic Resonance (NMR)

<sup>1</sup>H, <sup>13</sup>C, DEPT-135 and <sup>29</sup>Si Nuclear Magnetic Resonance (NMR) were performed on Bruker Ultra Shield 600, 400 and 300 spectrometers using CDCl<sub>3</sub> as a solvent. Chemical shifts are reported in ppm with reference to the residual solvent (CHCl<sub>3</sub>) peaks for <sup>1</sup>H and <sup>13</sup>C and to TMS for <sup>29</sup>Si NMR.

### FT-IR spectroscopy

Fourier Transform-Infrared (FT-IR) spectra were recorded on a Nicolet iS5 (Thermo Scientific) spectrophotometer equipped with a diamond ATR unit. In all cases, 16 scans at a resolution of 2 cm<sup>-1</sup> were collected, to record the spectra in a range of 4000-650 cm<sup>-1</sup>.

### Real-time FT-IR spectroscopy

In-situ FT-IR measurements were performed on a Mettler Toledo ReactIR 15 equipped with a DS 6.3 mm AgX DiComp Fiber Probe with a diamond sensor, and a Hg-Cd telluride detector. For all the spectra 256 scans were recorded with the resolution of 1 cm<sup>-1</sup> in 1 min intervals.<sup>5</sup>

### Gel permeation chromatography (GPC)

Gel permeation chromatography analyses were performed using a Waters Alliance 2695 system equipped with a Waters 2412 RI detector and a set of three serially connected 7.8x300 mm columns (Water Styragel HR1, HR2 and HR4). THF was used as a mobile phase in a flow rate of 0.60 mL/min; the column oven temperature was 35°C and detector temperature 40°C. Molecular weight (M<sub>n</sub>, M<sub>w</sub>) and polydispersity index (PDI) values were calculated based on calibration curve using polystyrene standards (Shodex) in a range from 1.31 x 10<sup>3</sup> to 3.64 x 10<sup>6</sup> Da.

### Elemental analyses (EA)

Elemental analyses (EA) were performed using a Vario EL III instrument (Elementar Analysensysteme GmbH, Langenselbold, Germany).

### X-ray crystallography

Diffraction data were collected by the  $\omega$ -scan technique, for **G0-4D-4H** at 120(1) K, on a Rigaku SuperNova four-circle diffractometer with Atlas CCD detector, equipped with mirror-monochromatized CuK <sub>$\alpha$</sub>  radiation source ( $\lambda = 1.54178 \text{ \AA}$ ), and for **G1-2D-4H** at 100(1) K, on Rigaku XCalibur four-circle diffractometer with Eos CCD detector, equipped with graphite-monochromatized MoK <sub>$\alpha$</sub>  radiation source ( $\lambda = 0.71073 \text{ \AA}$ ). The data were corrected for Lorentz-polarization as well as for absorption effects.<sup>6</sup> The structures were solved with SHELXT<sup>7</sup> and refined with the full-matrix least-squares procedure on F<sup>2</sup> by SHELXL-2013.<sup>8</sup> All non-hydrogen atoms were refined anisotropically, hydrogen

atoms were placed in idealized positions and refined as ‘riding model’ with isotropic displacement parameters set at 1.2 (1.5 for methyl groups) times  $U_{\text{eq}}$  of appropriate carrier atoms. In the structure **G0-4D-4H** one of the -O-SiMe<sub>2</sub>-CH<sub>2</sub>-CH<sub>2</sub>-SiHMe<sub>2</sub> groups is disordered over two alternative positions, the site occupation factors refined at 0.75(9)/0.25(9). Weak restraints have been applied to both positional and thermal parameters. The relevant crystallographic data together with the details of structure refinement are listed in **Table S1**.

Crystallographic data for the structural analysis has been deposited with the Cambridge Crystallographic Data Centre, Nos. CCDC-2184824 (**G0-4D-4H**), CCDC-2184825 (**G1-2D-4H**). Copies of this information may be obtained free of charge from: The Director, CCDC, 12 Union Road, Cambridge, CB2 1EZ, UK; e-mail: deposit@ccdc.cam.ac.uk, or [www.ccdc.cam.ac.uk](http://www.ccdc.cam.ac.uk).

**Table S1.** Crystal data, data collection and structure refinement

| Compound                             | <b>G0-4D-4H</b>                                                   | <b>G1-2D-4H</b>                                                  |
|--------------------------------------|-------------------------------------------------------------------|------------------------------------------------------------------|
| Formula                              | C <sub>72</sub> H <sub>108</sub> O <sub>14</sub> Si <sub>16</sub> | C <sub>56</sub> H <sub>64</sub> O <sub>14</sub> Si <sub>12</sub> |
| Formula weight                       | 1647.02                                                           | 1298.15                                                          |
| Crystal system                       | triclinic                                                         | orthorhombic                                                     |
| Space group                          | P-1                                                               | Pbca                                                             |
| a (Å)                                | 14.3705(4)                                                        | 10.1660(3)                                                       |
| b (Å)                                | 14.5795(4)                                                        | 26.3663(7)                                                       |
| c (Å)                                | 24.7232(5)                                                        | 24.1387(7)                                                       |
| α (°)                                | 91.0701(18)                                                       | 90                                                               |
| β (°)                                | 94.006(2)                                                         | 90                                                               |
| γ (°)                                | 119.020(3)                                                        | 90                                                               |
| V(Å <sup>3</sup> )                   | 4510.3(2)                                                         | 6470.1(3)                                                        |
| Z                                    | 2                                                                 | 4                                                                |
| D <sub>x</sub> (g cm <sup>-3</sup> ) | 1.213                                                             | 1.333                                                            |
| F(000)                               | 1752                                                              | 2720                                                             |
| μ(mm <sup>-1</sup> )                 | 2.586                                                             | 0.300                                                            |
| Reflections:                         |                                                                   |                                                                  |
| collected                            | 40198                                                             | 16025                                                            |
| unique (R <sub>int</sub> )           | 16071 (0.0651)                                                    | 6519 (0.0298)                                                    |
| with I>2σ(I)                         | 14238                                                             | 5289                                                             |
| R(F) [I>2σ(I)]                       | 0.0915                                                            | 0.0949                                                           |
| wR(F <sup>2</sup> ) [I>2σ(I)]        | 0.2053                                                            | 0.2372                                                           |
| R(F) [all data]                      | 0.0983                                                            | 0.1125                                                           |
| wR(F <sup>2</sup> ) [all data]       | 0.2088                                                            | 0.2470                                                           |
| Goodness of fit                      | 1.056                                                             | 1.040                                                            |
| max/min Δρ (e·Å <sup>-3</sup> )      | 1.97/-1.00                                                        | 1.03/-0.67                                                       |
| CCDC number                          | 2184824                                                           | 2184825                                                          |

### 3. Synthetic procedures

#### The verification of the location of the Si-H bond in the appropriate substrate

##### PATH A

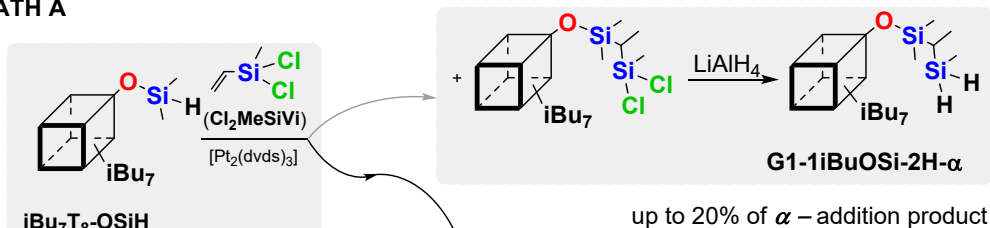

##### PATH B

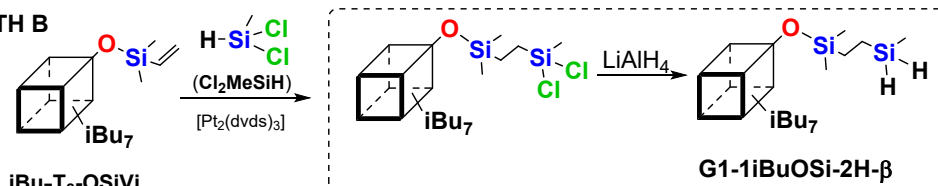

To a two-necked round-bottom flask equipped with a condenser and magnetic stirrer,  $\text{iBu}_7\text{T}_8\text{-OSiH}$  (METHOD A)/  $\text{iBu}_7\text{T}_8\text{-OSiVi}$  (METHOD B) (0.100 g, 0.12 mmol/ 0.102 g, 0.11 mmol), anhydrous toluene (3 mL) and dichlorovinylmethylsilane ( $\text{Cl}_2\text{MeSiVi}$ : 0.033 mL, 0.22 mmol) (METHOD A)/ dichloromethylsilane ( $\text{Cl}_2\text{MeSiH}$ : 0.023 mL, 0.22 mmol) (METHOD B) were placed in an argon atmosphere. The reaction was heated to 40°C and  $[\text{Pt}_2(\text{dvds})_3]$  (0.13  $\mu\text{L}$ ,  $1.12 \times 10^{-5}$  mmol / 0.12  $\mu\text{L}$ ,  $1.11 \times 10^{-5}$  mmol) was added. The reaction mixture was kept at 95°C for 24 hours. After cooling it to room temperature, the excess of silane and solvent was evaporated under a vacuum for 5 hours. After that, the compound was dissolved in anhydrous THF (2 mL) and lithium aluminium hydride (0.010 g, 0.27 mmol/0.010 g, 0.26 mmol) was added to the reaction mixture. The reaction was carried out at room temperature for 24 hours. Then, the solvent was evaporated under reduced pressure. *N*-hexane was added to the crude product and the mixture was filtered by a syringe filter (0.2  $\mu\text{m}$ ) and washed with *n*-hexane (5 mL). The solvent was evaporated under a vacuum and isolated as a white solid.

Selectivity of  $\text{G1-1iBuOSi-2H-}\beta$  :  $\text{G1-1iBuOSi-2H-}\alpha$  products for PATH A was 80 : 20 and for PATH B was 100 : 0.

#### General procedure for the one-pot synthesis of dendritic systems with mono- $\text{T}_8$ and double-decker silsesquioxane core through hydrosilylation followed by reduction reaction:

- $\text{LiAlH}_4$  as a reduction agent

The synthetic procedure was described for  $\text{G0-1iBu-1H}$  as an example. To a two-necked round-bottom flask equipped with a condenser and magnetic stirrer,  $\text{iBu}_7\text{T}_8\text{-Vi}$  (0.106 g, 0.13 mmol), anhydrous toluene (3 mL) and chlorodimethylsilane (0.03 mL, 0.25 mmol) were placed in an argon atmosphere. The reaction was heated to 40°C and  $[\text{Pt}_2(\text{dvds})_3]$  (0.14  $\mu\text{L}$ ,  $1.25 \times 10^{-5}$  mmol) was added. The reaction mixture was kept at 95°C for 24 hours. After cooling it to room temperature, the excess of silane and solvent was evaporated under a vacuum for 5 hours. After that, the compound was dissolved in anhydrous THF (2 mL) and lithium aluminium hydride (0.006 g, 0.15 mmol) was added to the reaction mixture. The reaction was carried out at room temperature for 24 hours. Then, the solvent was evaporated under reduced pressure. *N*-hexane was added to the crude product and the mixture was filtered by a syringe filter (0.2  $\mu\text{m}$ ) and washed with *n*-hexane (5 mL). The solvent was evaporated under a vacuum and isolated as a white solid, in a total yield of 90%.

- **Red-Al<sup>®</sup> as a reduction agent**

The procedure for the synthesis of **G0-2D-2H** is described as an example. To a two-neck round-bottom flask equipped with a condenser and magnetic stirrer, **DDSQ-2SiVi** (0.200 g, 0.17 mmol) was placed in argon atmosphere along with anhydrous toluene (6.0 mL), and 4 equivalent of silane-chlorodimethylsilane (0.071 mL, 0.66 mmol) and 10<sup>-4</sup> equiv. of [Pt<sub>2</sub>(dvds)<sub>3</sub>] (0.38 μL 3.32×10<sup>-5</sup> mmol). The reaction mixture was kept at 95°C for 24 hours. After cooling it to room temperature, the excess of silane and solvent was evaporated under a vacuum for 8 hours. After that anhydrous toluene (8.0 mL), sodium bis(2-methoxyethoxy) aluminium hydride solution (0.65 g, 3.20 mmol) (Red-Al<sup>®</sup>) were added. The reaction mixture was kept at room temperature for 20 hours.

Isolation:

- **Method I:** The post-reaction mixture was evaporated under reduced pressure. The crude product was dissolved in DCM and precipitated in MeCN. After decantation, the remains of MeCN were evaporated. The crude, white powder was washed with DCM several times (3 x 10 mL) and the decant was evaporated under a vacuum and isolated as a white solid, in a total yield of 64%.
- **Method II:** The reaction mixture was added dropwise to the mixture of 10% acetic acid water solution (10 mL) and toluene (5 mL). The white solid was precipitated. After the agitation was turned off, the phases separated. The water layer was extracted by toluene (10 mL). The organic layer was combined and toluene was evaporated under a vacuum. The white solid was isolated in a total yield of 90%.

**General procedure for the one-pot synthesis of G1 dendritic systems with octa-T<sub>8</sub> silsesquioxane core through hydrosilylation followed by reduction reaction:**

Procedure for the one-pot synthesis of G1-8T-24H:

The reaction was carried out in an oven-dried Schlenk-type reactor under an argon atmosphere. Octavinyl spherosilicate (**octaT<sub>8</sub>-OSiVi**) (1.00 g, 0.82 mmol) was placed along with anhydrous toluene (10.0 mL) and trichlorosilane (0.73 mL, 7.23 mmol) was added. To the prepared mixture of reagents Karstedt's complex was added (7.5 μL, 10<sup>-4</sup> mol Pt/ mol SiVi), the reaction vessel was closed and heated at 95°C with stirring. The reaction was monitored with FT-IR and <sup>1</sup>H NMR spectroscopy, by following the band originating from SiVi units (FT-IR 1596 cm<sup>-1</sup>). After the complete conversion of vinyl units, the reaction was cooled down, and then the toluene and an excess of chlorosilane were evaporated under reduced pressure. The obtained oil was dissolved in 20 mL of anhydrous toluene, and then 4.1 mL of Red-Al<sup>®</sup> sodium bis(2-methoxyethoxy) aluminium hydride solution was added dropwise and the reaction was stirred for 18 hours at room temperature. The resulting mixture was added to 2-propanol and stirred for 1 hour. After that, the solvents and volatile liquids were evaporated under reduced pressure. The product was extracted from the resulting mixture with *n*-hexane and then filtered through a cellite/silica gel column. Evaporation of *n*-hexane led to the formation of transparent oil in a total yield of 85%. NMR analysis showed the formation of only the β isomer. Caution: before the addition of Red-Al<sup>®</sup>, the excess of trichlorosilane must be removed from the vessel. The presence of HSiCl<sub>3</sub> during the addition of Red-Al<sup>®</sup> leads to the formation of pyrophoric SiH<sub>4</sub>.

Procedure for the one-pot synthesis of G1-8T-16H:

The reaction was carried out in an oven-dried Schlenk-type reactor under an argon atmosphere. Octavinyl spherosilicate (**octaT<sub>8</sub>-OSiVi**) (5.00 g, 4,1 mmol, 32.68 mmol of vinyl groups) was placed along with anhydrous toluene (25 mL) and then 3.85 mL (36.98 mmol) dichloromethylsilane was added. To the prepared mixture of reagents Karstedt's complex was added (37.5 μL, 10<sup>-4</sup> mol Pt/ mol SiVi), the reaction vessel was closed and heated at 95°C with stirring. The reaction was monitored with FT-IR

and  $^1\text{H}$  NMR spectroscopy, by following the band originating from SiVi units (FT-IR  $1596\text{ cm}^{-1}$ ). After the complete conversion of vinyl units, the reaction was cooled down, and then the toluene and an excess of chlorosilane were evaporated under reduced pressure. The resulting oil was dissolved in 25 mL of anhydrous toluene and then 13.2 mL Red-Al<sup>®</sup> sodium bis(2-methoxyethoxy) aluminium hydride solution was added dropwise. Then the reaction mixture was stirred overnight at room temperature. After that, the mixture was added to 2-propanol and stirred for one hour. Then the solvents and the volatiles were removed under reduced pressure. The product was extracted from the resulting mixture with *n*-hexane and then filtered through a cellite/silica gel column. Evaporation of *n*-hexane led to the formation of transparent oil in a total yield of 85%. NMR analysis showed the formation of only the  $\beta$  isomer.

**General procedure for the one-pot synthesis of G2 dendritic systems with octa-T<sub>8</sub> silsesquioxane core through hydrosilylation followed by reduction reaction:**

To a mixture prepared from 2 g of **G1-8T-16H** (1.253 mmol, 20.06 mmol SiH) and 15 mL of anhydrous toluene, dichloromethylvinylsilane was added (3.18 g/2.95 mL, 22.56 mmol). To a resulting mixture, Karstedt's catalyst was added ( $2 \times 10^{-4}$  mol Pt/SiH) and the reaction vessel was closed and heated to 100°C. The reaction was monitored with infrared spectroscopy. After the complete conversion of H-Si units mixture was cooled down and the solvent and chlorosilane excess were evaporated under reduced pressure. The obtained oil was dissolved in 20 mL of anhydrous THF and then 0.76 g (20 mmol) of LiAlH<sub>4</sub> was added and the reaction was stirred at room temperature overnight. The resulting mixture was filtered through a cannula. The resulting solution was filtrated through cellite/silica gel column and washed with THF, toluene and diethyl ether. Evaporation of the solvent gave 2.68 g (Yield 77%) of very viscous transparent oil.

**General procedure for the functionalization of G1-4D-8H through hydrosilylation:**

The synthetic protocol is presented for **G1-8D-8epoxy** as an example. To a two-necked round-bottom flask equipped with a condenser and magnetic stirrer, **G1-4D-8H** (0.108 g, 0.07 mmol), toluene (3 mL) and allyl glycidyl ether (0.07 mL, 0.61 mmol) were placed in an argon atmosphere. The reaction was heated to 40°C and [Pt<sub>2</sub>(dvds)<sub>3</sub>] (0.62  $\mu\text{L}$ ,  $2.34 \times 10^{-5}$  mmol) was added. The reaction mixture was kept at 95°C for 24 hours. After cooling it to room temperature, the reaction mixture was transferred to a flask and toluene and unreacted allyl glycidyl ether were evaporated under reduced pressure. The pure product was obtained in a total yield of 85%.

**General procedure for the functionalization of G1-16T-16H through hydrosilylation:**

0.5g (0.313mmol, 5.01 mmol SiH) of **G1-8T-16H**, 5.64 mmol of alkene and 2.5 mL of toluene were placed in a 10 mL Schlenk-glass reactor. The prepared mixture was heated to 95°C and Karstedt's complex was added ( $2 \times 10^{-4}$  Pt/mol SiH). The reaction was monitored by FT-IR spectroscopy by following the band assigned to SiH units at *ca.*  $2124\text{ cm}^{-1}$ . After the disappearance of the H-Si band in the FT-IR spectrum, the mixture was cooled down to room temperature and then filtered through a silica gel/cellite column and washed with toluene. Evaporation of toluene gave viscous oils. Yields: 91% and 88% for 1-octene and allyl-glycidyl ether, respectively.

#### 4. Table of isolated compounds:

| Structure                                                                                                      | Compound Abbrev.       | Isolation Yield[%] | NMR spectra page: |
|----------------------------------------------------------------------------------------------------------------|------------------------|--------------------|-------------------|
| 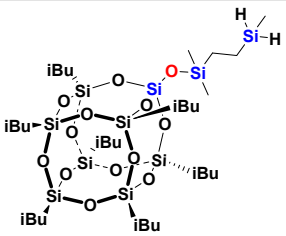                              | <b>G1-1iBuOSi-2H-β</b> | <b>89</b>          | S-11-             |
|                               | <b>G0-1iBu-1H</b>      | <b>90</b>          | S-13-             |
|                              | <b>G1-1iBu-2H</b>      | <b>89</b>          | S-15-             |
| <br>+ ( $\alpha$ -products) | <b>G2-2iBu-4H</b>      | <b>94</b>          | S-17-             |
|                             | <b>G0-1Ph-1H</b>       | <b>53</b>          | S-20-             |
|                             | <b>G1-1Ph-2H</b>       | <b>72</b>          | S-22-             |

|                                                                                     |                     |           |       |
|-------------------------------------------------------------------------------------|---------------------|-----------|-------|
| 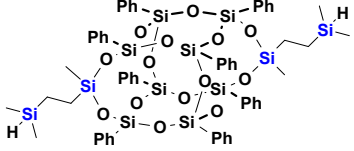   | <b>G0-2D-2H</b>     | <b>91</b> | S-24- |
|    | <b>G1-2D-4H</b>     | <b>85</b> | S-26- |
|    | <b>G0-4D-4H</b>     | <b>94</b> | S-28- |
|    | <b>G1-4D-8H</b>     | <b>91</b> | S-30- |
|   | <b>G1-8D-8epoxy</b> | <b>85</b> | S-32- |
|  | <b>G1-8T-16H</b>    | <b>85</b> | S-34- |



|                                                                                                                             |                              |                  |              |
|-----------------------------------------------------------------------------------------------------------------------------|------------------------------|------------------|--------------|
| 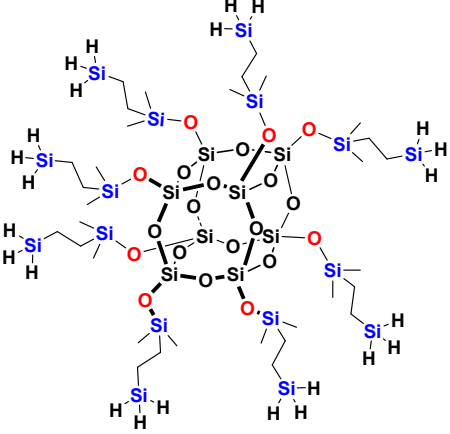                                           | <p><b>G1-8T-24H</b></p>      | <p><b>85</b></p> | <p>S-36-</p> |
|                                           | <p><b>G2-16T-32H</b></p>     | <p><b>77</b></p> | <p>S-38-</p> |
|  <p>+ (<math>\alpha</math> products)</p> | <p><b>G1-16T-16octyl</b></p> | <p><b>91</b></p> | <p>S-40-</p> |

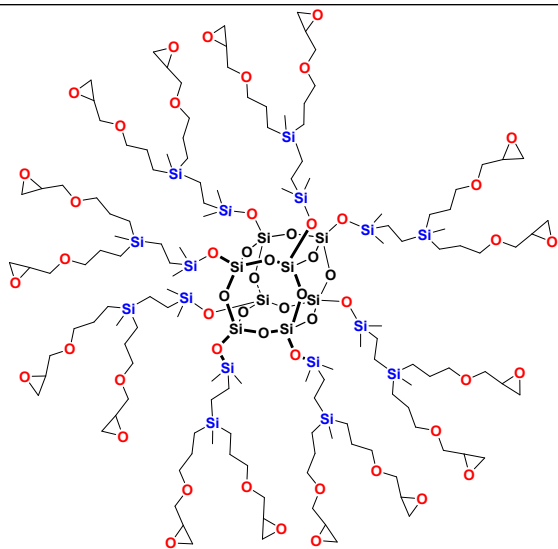

+ ( $\alpha$   
products)

**G1-16T-16epoxy**

**88**

S-42-

## 5. Characterization data of the obtained products ( $^1\text{H}$ , $^{13}\text{C}$ , $^{29}\text{Si}$ NMR spectra and IR spectroscopy)

### G1-1iBuOSi-2H- $\beta$

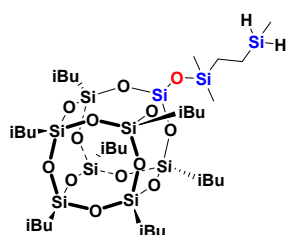

White solid. Isolated Yield 89%

$^1\text{H}$  NMR (300 MHz,  $\text{CDCl}_3$ , ppm):  $\delta$  = 0.11 (s, 6H,  $-\text{CH}_3$ ), 0.12-0.15 (t, 3H,  $-\text{CH}_3$ ), 0.59-0.62 (m, 18H,  $\text{CH}_2\text{CH}(\text{CH}_3)_2$ ,  $\text{CH}_2-\text{CH}_2$ ), 0.96 (dd,  $J_{\text{H-H}}=6.6, 2.1$  Hz, 42H,  $-\text{CH}_3$ ), 1.80-1.91 (m, 7H,  $-\text{CH}(\text{CH}_3)_2$ ), 3.70-3.74 (m, 2H, Si-H).

$^{13}\text{C}$  NMR (75.50 MHz,  $\text{CDCl}_3$ , ppm):  $\delta$  = -8.56 (Si- $\text{CH}_3$ ), -0.73 (Si- $\text{CH}_3$ ); 2.36 (Si- $\text{CH}_2$ -), 11.79 (Si- $\text{CH}_2$ -), 22.59-22.68 ( $-\text{CH}_2\text{CH}(\text{CH}_3)_2$ ), 24.01-24.04 ( $-\text{CH}(\text{CH}_3)_2$ ), 25.87 ( $\text{CH}(\text{CH}_3)_2$ ).

$^{29}\text{Si}$  NMR (79.50 MHz,  $\text{CDCl}_3$ , ppm):  $\delta$  = 11.44 ( $-\text{Si}-\text{CH}_3$ ); -29.08 ( $-\text{Si}-\text{H}$ ), -67.07, -67.10, -67.87, -67.90 ( $-\text{Si}-\text{iBu}$ ), -109.64 ( $\text{SiO}_4$ ).

IR (ATR,  $\text{cm}^{-1}$ ): 2952.30, 2924.49, 2905.56, 2868.00 (C-H), 2127.19 (Si-H), 1464.32 (C-H), 1228.77 (Si-C), 1168.48, 1075.60 (Si-O-Si), 901.41 (Si-H).

EA: Anal. calcd for  $\text{C}_{33}\text{H}_{78}\text{O}_{13}\text{Si}_{10}$  (%): C, 41.12, H, 8.16; found: C, 41.28; H, 8.19.

GPC:  $M_w$  = 1165;  $M_n$  = 955;  $D$  = 1.22.

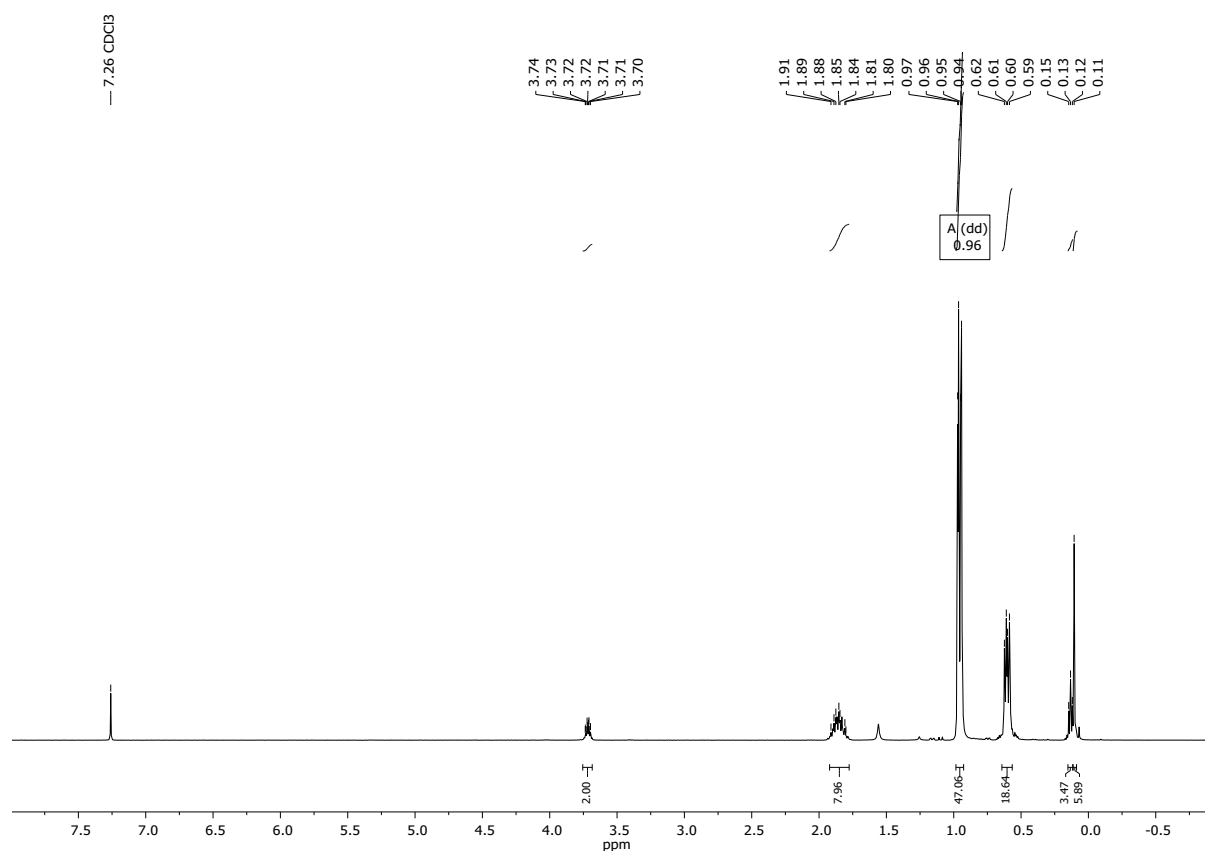

Figure S1  $^1\text{H}$  NMR (300 MHz,  $\text{CDCl}_3$ ) spectrum of G1-1iBuOSi-2H- $\beta$ .

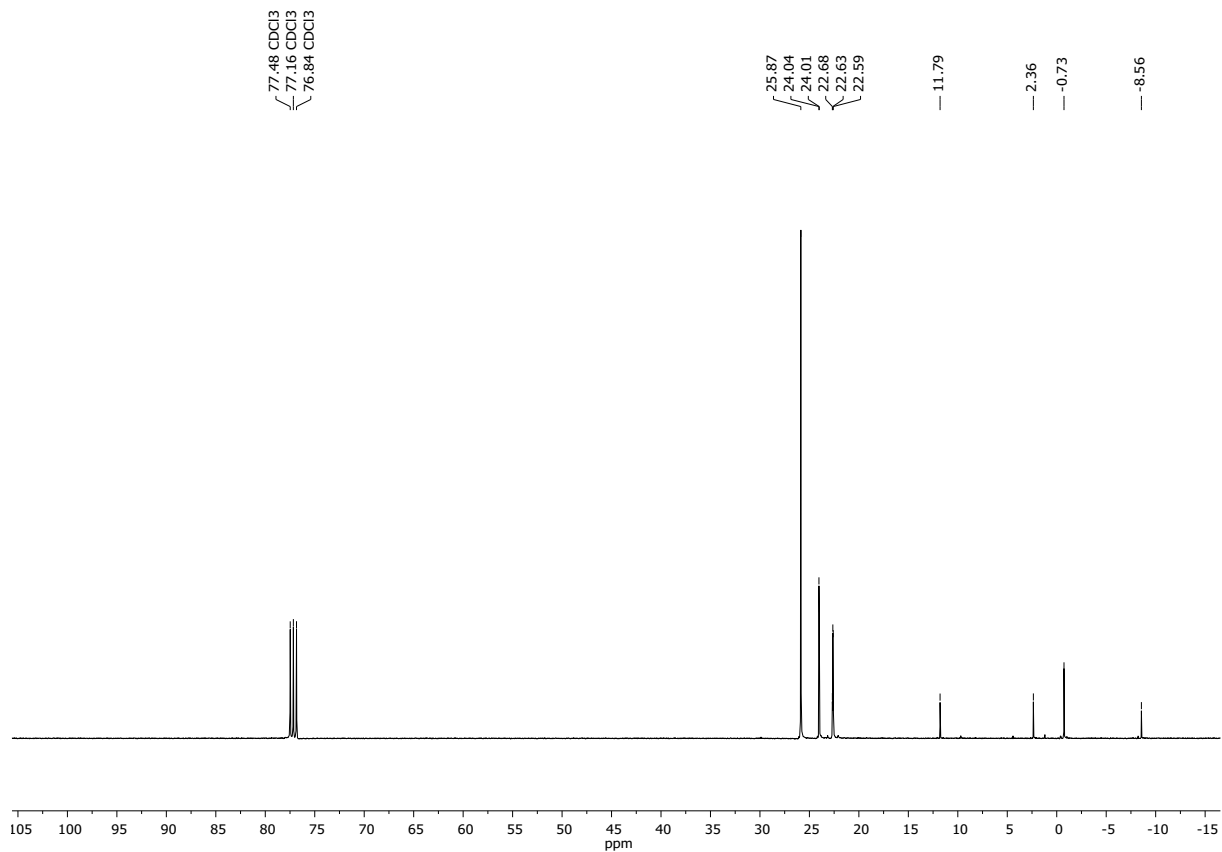

**Figure S2**  $^{13}\text{C}$  NMR (75.50 MHz,  $\text{CDCl}_3$ ) spectrum of **G1-1iBuOSi-2H- $\beta$** .

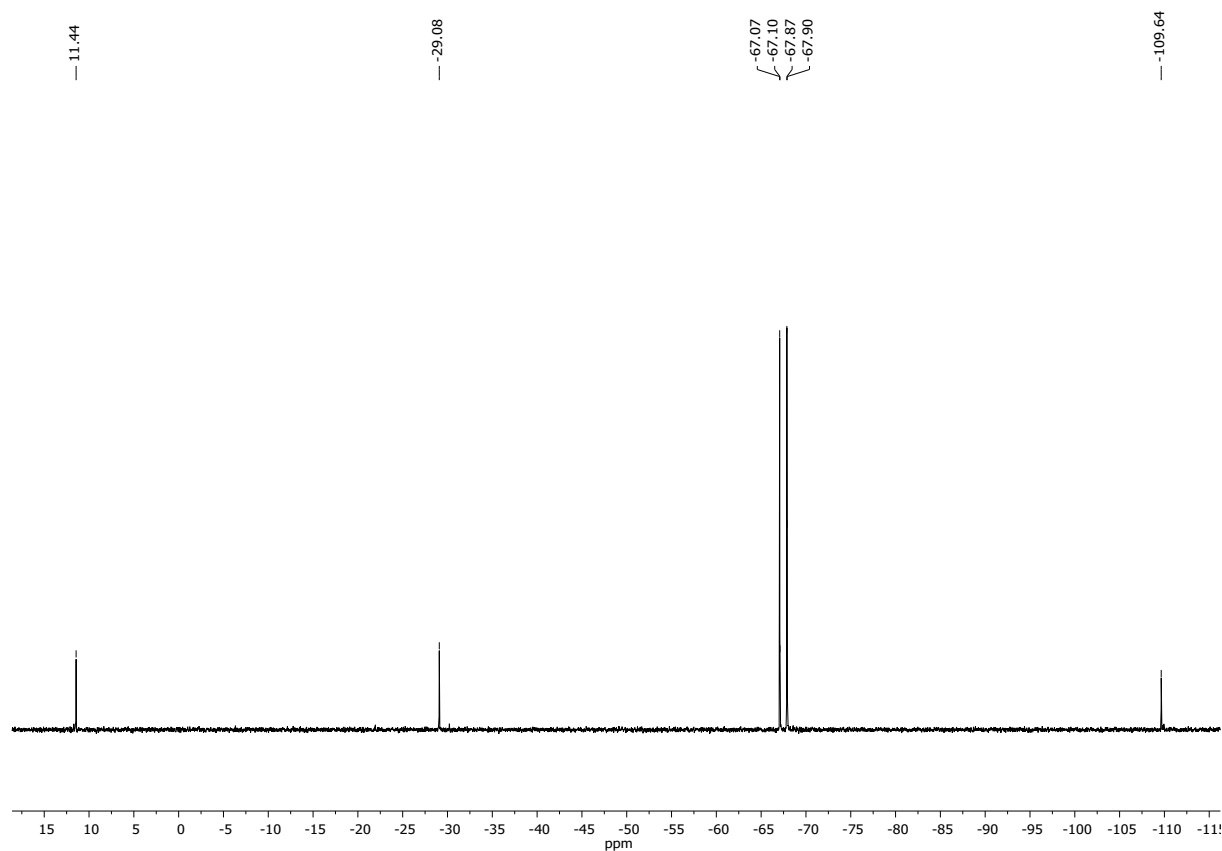

**Figure S3**  $^{29}\text{Si}$  NMR (79.50 MHz,  $\text{CDCl}_3$ ) spectrum of **G1-1iBuOSi-2H- $\beta$** .

## G0-iBu-1H

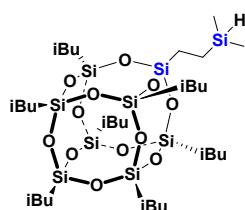

White solid. Isolated Yield 90%

**<sup>1</sup>H NMR** (300 MHz, CDCl<sub>3</sub>, ppm): δ = 0.06 (d,  $J_{\text{H-H}}=3.6$  Hz, 6H, -CH<sub>3</sub>), 0.56-0.62 (m, 18H, CH<sub>2</sub>CH(CH<sub>3</sub>)<sub>2</sub>, CH<sub>2</sub>-CH<sub>2</sub>), 0.96 (d,  $J_{\text{H-H}}=6.6$  Hz, 42H, -CH<sub>3</sub>), 1.79-1.92 (m, 7H, -CH(CH<sub>3</sub>)<sub>2</sub>), 3.81-3.85 (m, 1H, Si-H).

**<sup>13</sup>C NMR** (75.50 MHz, CDCl<sub>3</sub>, ppm): δ = -4.75 (Si-CH<sub>3</sub>), 5.19 (Si-CH<sub>2</sub>-), 5.57 (Si-CH<sub>2</sub>-), 22.63-22.68 (-CH<sub>2</sub>CH(CH<sub>3</sub>)<sub>2</sub>), 24.03 (-CH(CH<sub>3</sub>)<sub>2</sub>), 25.58-26.10 (CH(CH<sub>3</sub>)<sub>2</sub>).

**<sup>29</sup>Si NMR** (79.50 MHz, CDCl<sub>3</sub>, ppm): δ = -10.12 (-Si-H), -67.29 (-Si-CH<sub>2</sub>), -67.62, -67.86, -67.91 (-Si-iBu).

**IR** (ATR, cm<sup>-1</sup>): 2951.88, 2924.19, 2904.99, 2868.24 (C-H), 2111.44 (Si-H), 1463.89 (C-H), 1228.51 (Si-C), 1168.00, 1081.27, 1037.66 (Si-O-Si), 885.15 (Si-H).

**EA**: Anal. calcd for C<sub>32</sub>H<sub>74</sub>O<sub>12</sub>Si<sub>9</sub> (%): C, 42.53, H, 8.25; found: C, 42.70; H, 8.28.

**GPC**:  $M_w = 1007$ ;  $M_n = 865$ ;  $D = 1.16$ .

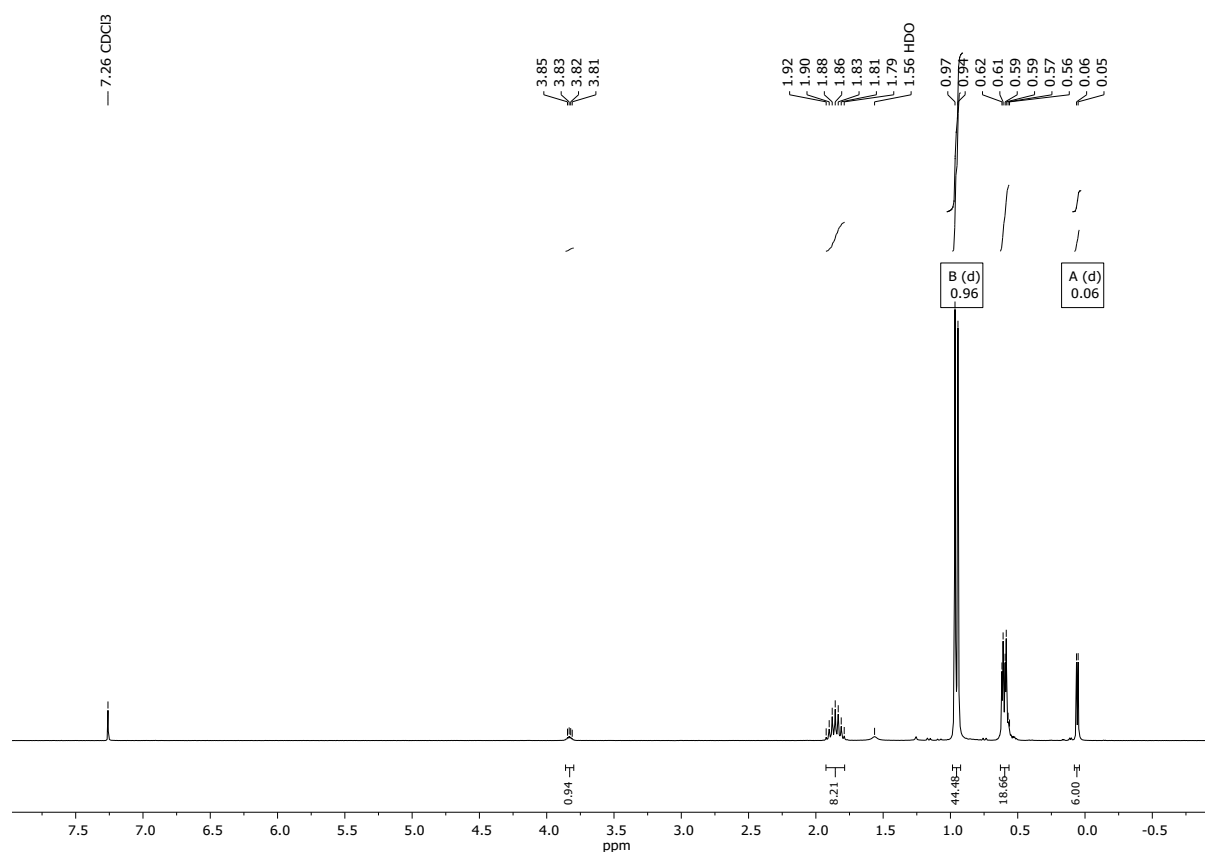

Figure S4 <sup>1</sup>H NMR (300 MHz, CDCl<sub>3</sub>) spectrum of G0-iBu-1H.

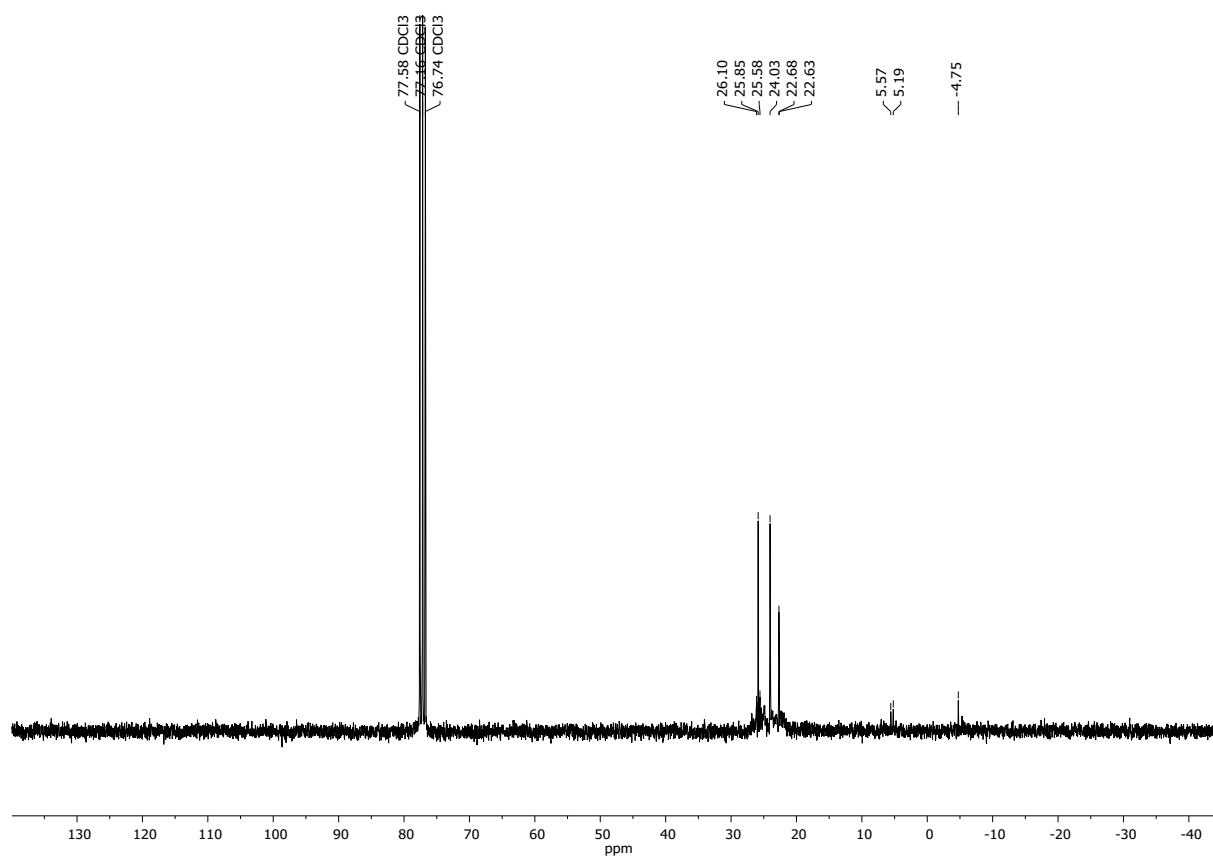

Figure S5 <sup>13</sup>C NMR (75.50 MHz, CDCl<sub>3</sub>) spectrum of G0-1iBu-1H.

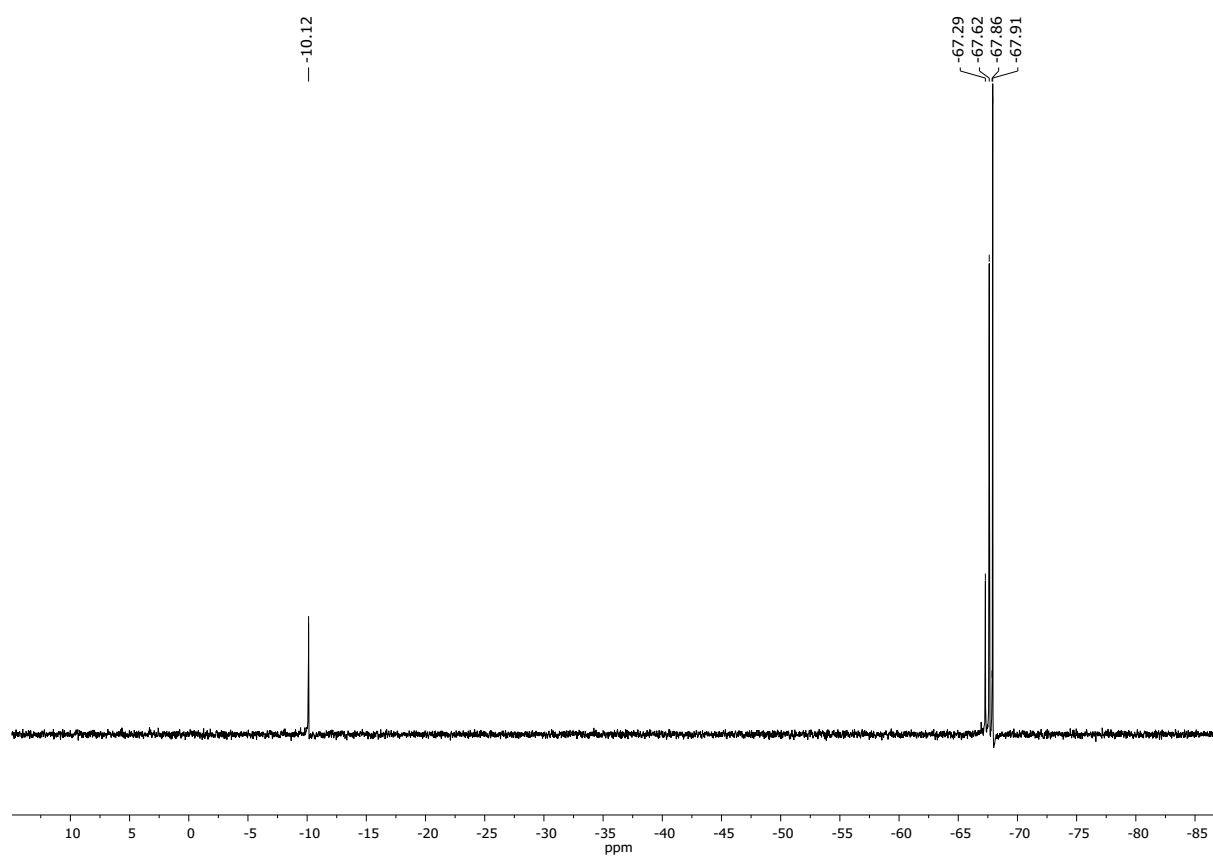

Figure S6 <sup>29</sup>Si NMR (79.50 MHz, CDCl<sub>3</sub>) spectrum of G0-1iBu-1H.

## G1-iBu-2H

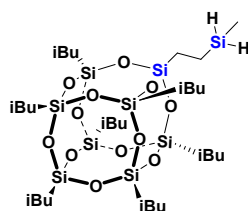

White solid. Isolated Yield 89%

**<sup>1</sup>H NMR** (300 MHz, CDCl<sub>3</sub>, ppm):  $\delta$  = 0.13 (t,  $J_{\text{H-H}} = 4.1$  Hz, 3H, -CH<sub>3</sub>), 0.59-0.64 (m, 18H, CH<sub>2</sub>CH(CH<sub>3</sub>)<sub>2</sub>, CH<sub>2</sub>-CH<sub>2</sub>), 0.95 (d,  $J_{\text{H-H}} = 6.6$  Hz, 42H, -CH<sub>3</sub>), 1.86 (dt, 1.86 (dt,  $J_{\text{H-H}} = 13.4, 6.7$  Hz, 8H, -CH(CH<sub>3</sub>)<sub>2</sub>), 3.69-3.73 (m, 2H, Si-H).

**<sup>13</sup>C NMR** (75.50 MHz, CDCl<sub>3</sub>, ppm):  $\delta$  = -8.60 (Si-CH<sub>3</sub>), 2.34 (Si-CH<sub>2</sub>-), 6.35 (Si-CH<sub>2</sub>-), 22.64-22.68 (-CH<sub>2</sub>CH(CH<sub>3</sub>)<sub>2</sub>), 24.03-24.05 (-CH(CH<sub>3</sub>)<sub>2</sub>), 25.84-25.86 (CH(CH<sub>3</sub>)<sub>2</sub>).

**<sup>29</sup>Si NMR** (79.50 MHz, CDCl<sub>3</sub>, ppm):  $\delta$  = -29.46 (-Si-H), -67.53, -67.59 (-Si-CH<sub>2</sub>), -67.72, -67.77, -67.84, -67.90 (-Si-iBu).

**IR** (ATR, cm<sup>-1</sup>): 2954.49, 2925.40, 2907.24, 2868.70 (C-H), 2127.43 (Si-H), 1464.85 (C-H), 1264.10 (Si-C), 1167.93, 1095.75, 1037.37 (Si-O-Si), 900.83 (Si-H).

**EA:** Anal. calcd for C<sub>31</sub>H<sub>72</sub>O<sub>12</sub>Si<sub>9</sub> (%): C, 41.85, H, 8.16; found: C, 42.02; H, 8.19.

**GPC:** M<sub>w</sub> = 971; M<sub>n</sub> = 822;  $\bar{D}$  = 1.18.

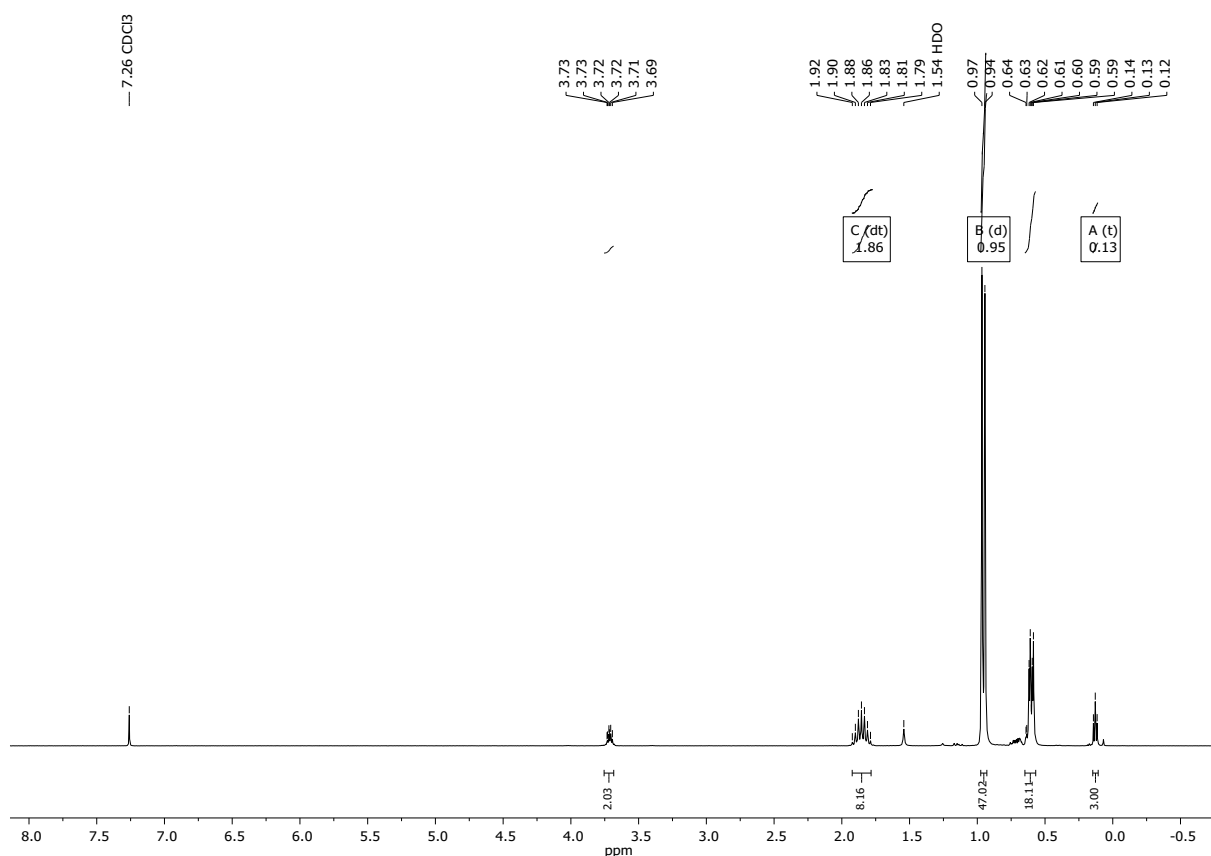

Figure S7 <sup>1</sup>H NMR (300 MHz, CDCl<sub>3</sub>) spectrum of G1-iBu-2H.

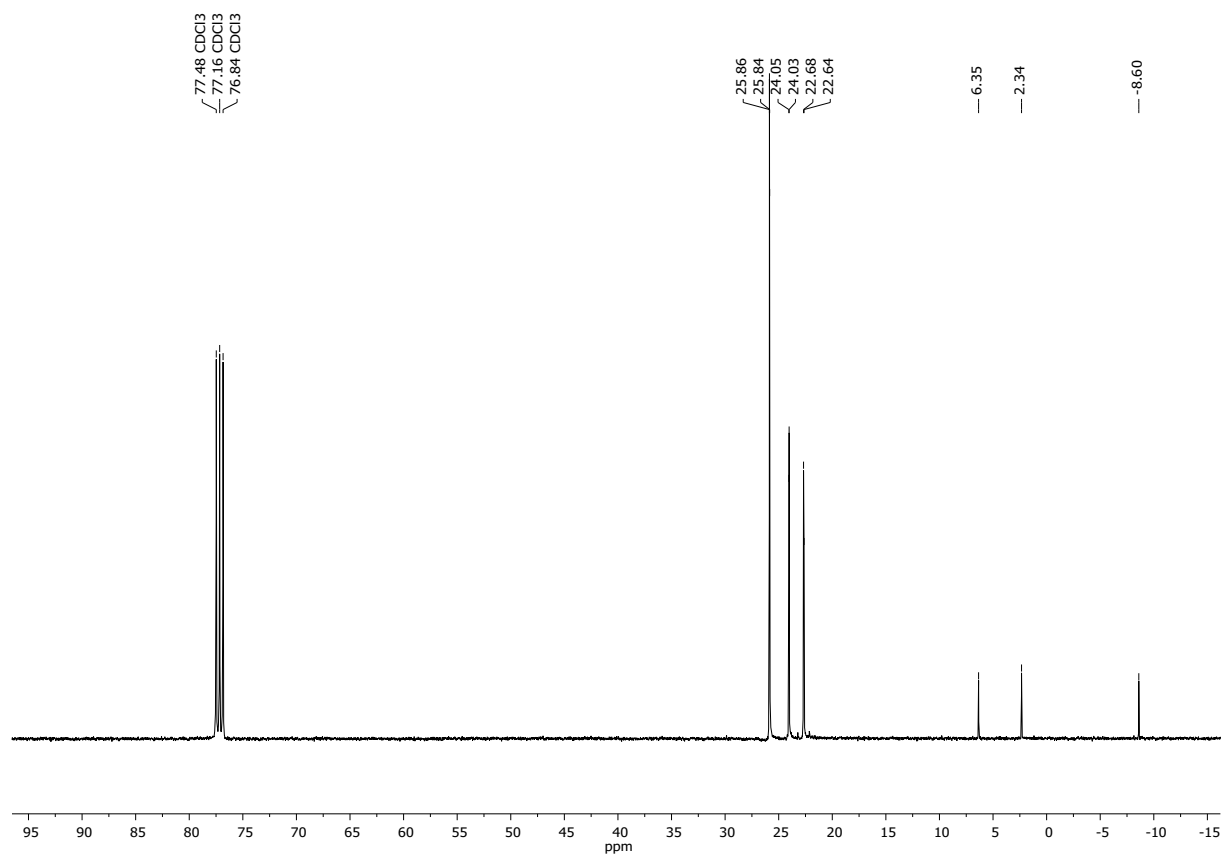

**Figure S8**  $^{13}\text{C}$  NMR (101 MHz,  $\text{CDCl}_3$ ) spectrum of **G1-iBu-2H**.

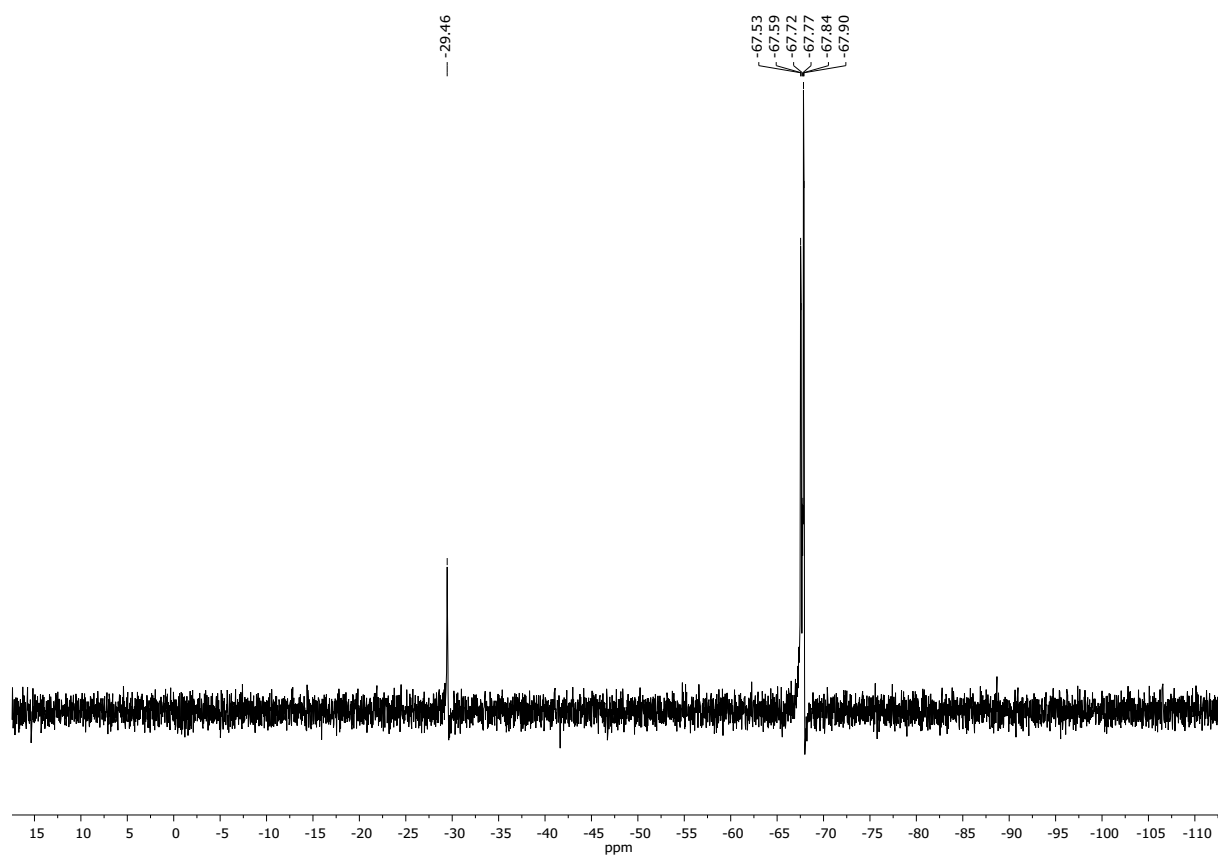

**Figure S9**  $^{29}\text{Si}$  NMR (79.50 MHz,  $\text{CDCl}_3$ ) spectrum of **G1-iBu-2H**.



## G2-2iBu-4H

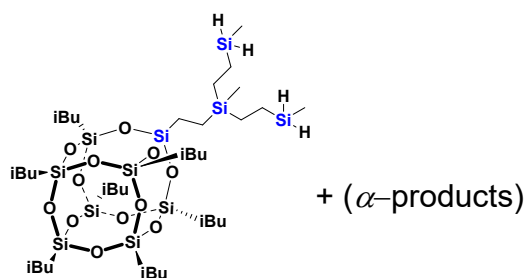

White solid. Isolated Yield 94% for a mixture of hydrosilylation besides products.

$^1\text{H NMR}$  (300 MHz,  $\text{CDCl}_3$ , ppm):  $\delta$  = 0.05-0.08 (m, 3H,  $\text{SiCH}_3$ ), 0.14-0.16 (m, 3H,  $\text{SiCH}_3$ ), 0.59-0.62 (m, 18H,  $\text{CH}_2\text{CH}(\text{CH}_3)_2$ ,  $\text{SiCH}_2$ ), 0.95 (d,  $J_{\text{H-H}}=6.6$  Hz, 42H), 1.79-1.92 (m, 7H,  $\text{CH}(\text{CH}_3)_2$ ), 3.70-3.74 (m, 1H, Si-H), 3.77-3.80 (m, 1H, Si-H).

$^{13}\text{C NMR}$  (101 MHz,  $\text{CDCl}_3$ , ppm):  $\delta$  = -8.52, -8.41, -7.38, -6.86, -6.82, -1.53, -1.21, 1.19, 2.35, 3.20 ( $\text{SiCH}_3$ ,  $\text{CH-CH}_3$ ), 3.63, 3.76, 3.90, 3.99, 5.31, 5.46, 5.57, 6.37, 6.54, 6.88 ( $\text{Si-CH}_2$ -), 10.75, 11.13 ( $-\text{CH-}$ ), 22.67-22.71 ( $\text{CH}_2\text{CH}(\text{CH}_3)_2$ ), 24.04-24.07 ( $\text{CH}(\text{CH}_3)_2$ ), 25.87 ( $\text{CH}(\text{CH}_3)_2$ ).

$^{29}\text{Si NMR}$  (79.50 MHz,  $\text{CDCl}_3$ , ppm):  $\delta$  = -2.60, -3.31, -4.30 ( $-\text{Si-CH}_3$ ), -29.19, -29.27, -29.63, -29.66 ( $-\text{Si-H}$ ), -67.42, -67.47, -67.60, -67.91 ( $-\text{Si-iBu}$ ).

**IR** (ATR,  $\text{cm}^{-1}$ ): 2953.05, 2925.10, 2906.08, 2868.54 (C-H), 2123.99 (Si-H) 1464.48 (C-H), 1228.06 (Si-C), 1167.92, 1088.24, 1036.91 (Si-O-Si), 905.95 (Si-H).

**GPC**:  $M_w = 1164$ ;  $M_n = 1072$ ;  $D = 1.09$ .

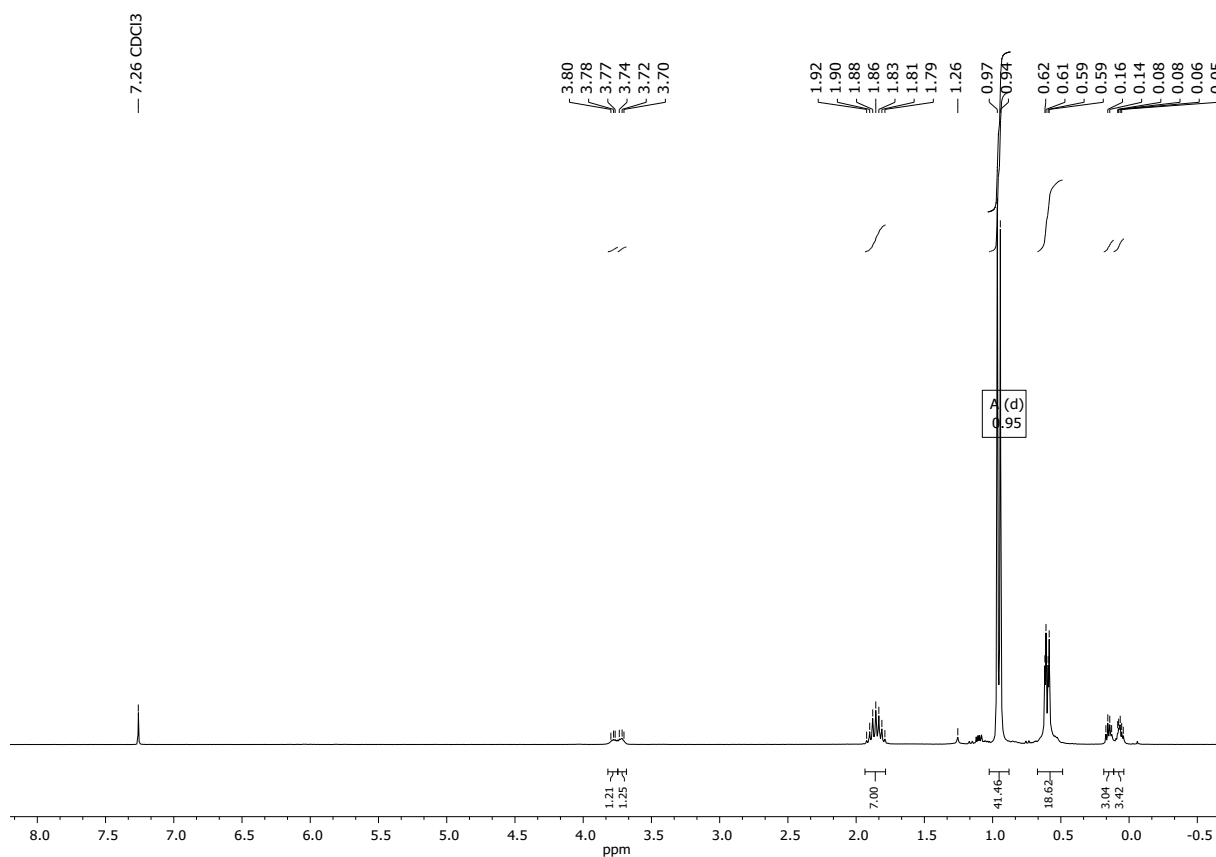

Figure S10  $^1\text{H NMR}$  (300 MHz,  $\text{CDCl}_3$ ) spectrum of G2-2iBu-4H.

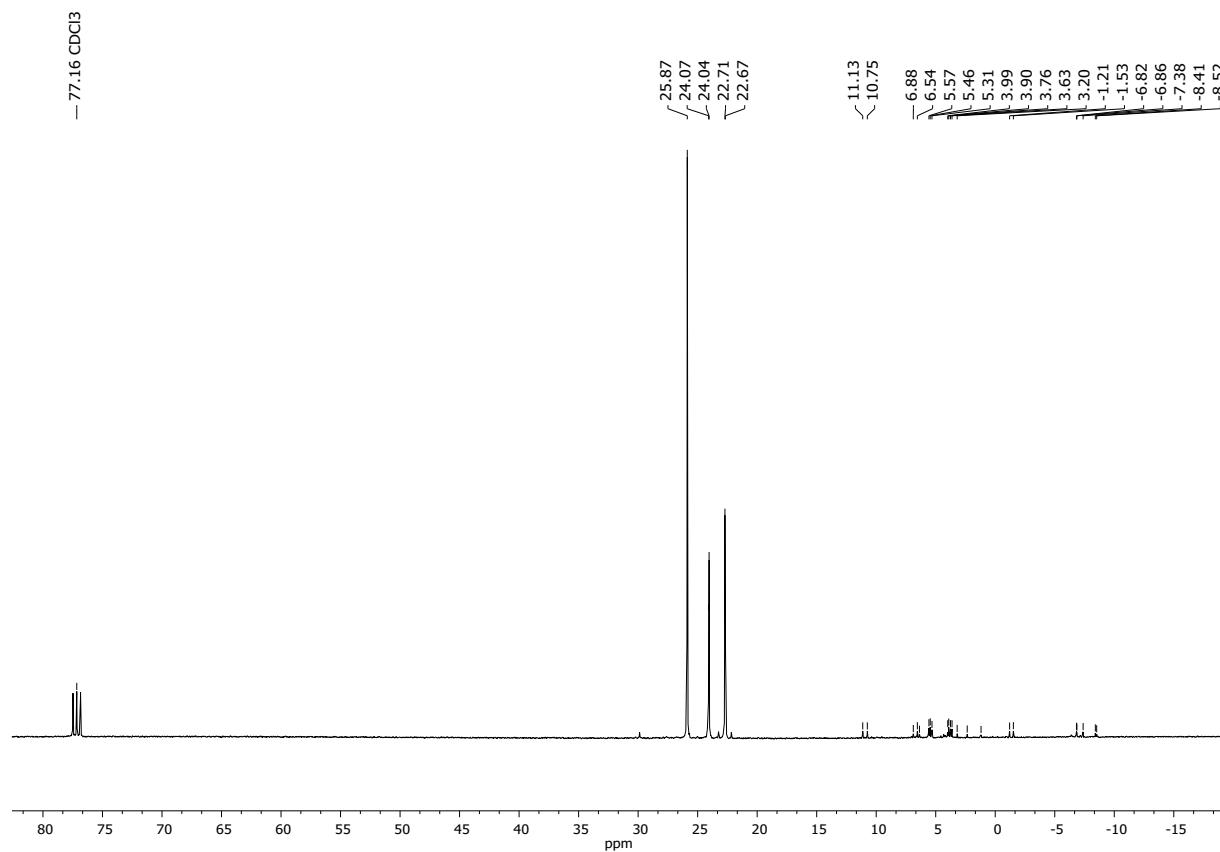

Figure S11 <sup>13</sup>C NMR (101 MHz, CDCl<sub>3</sub>) spectrum of G2-2iBu-4H.

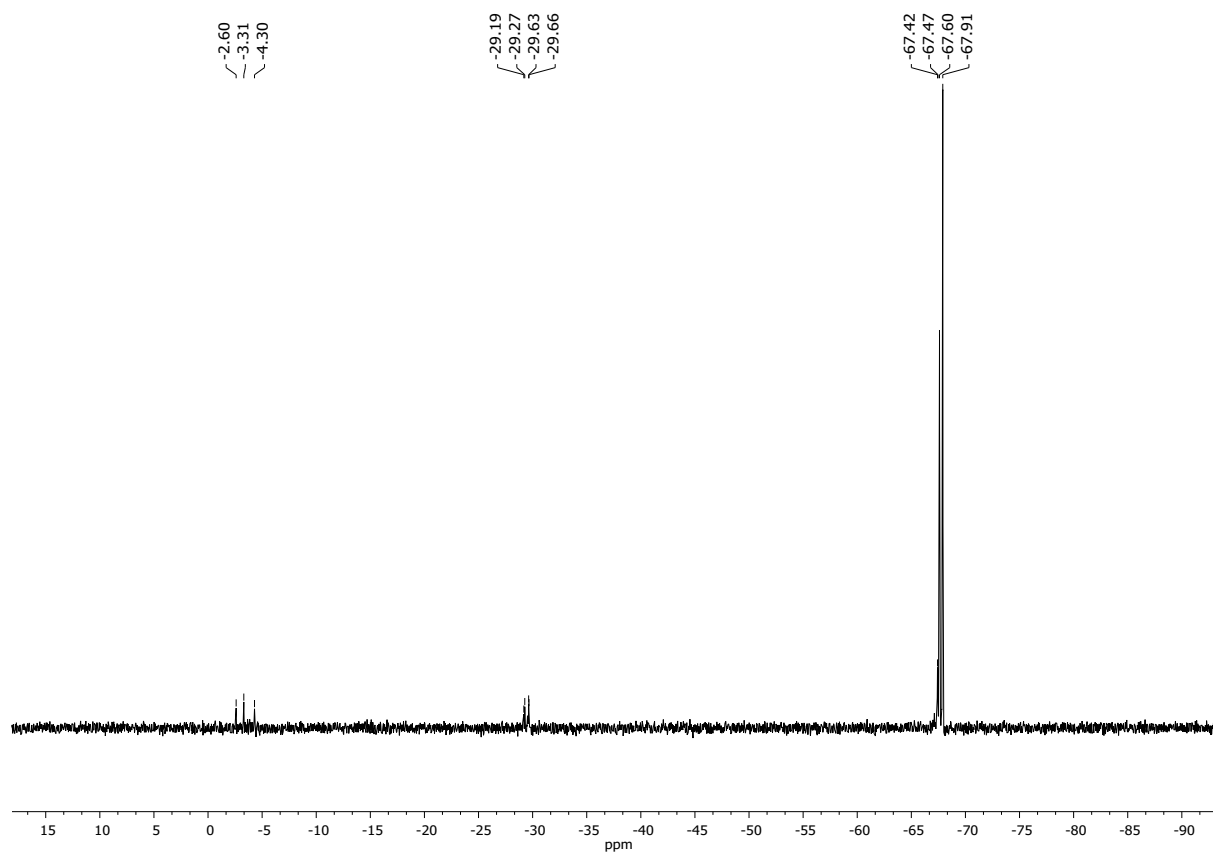

Figure S12 <sup>29</sup>Si NMR (79.50 MHz, CDCl<sub>3</sub>) spectrum of G2-2iBu-4H.

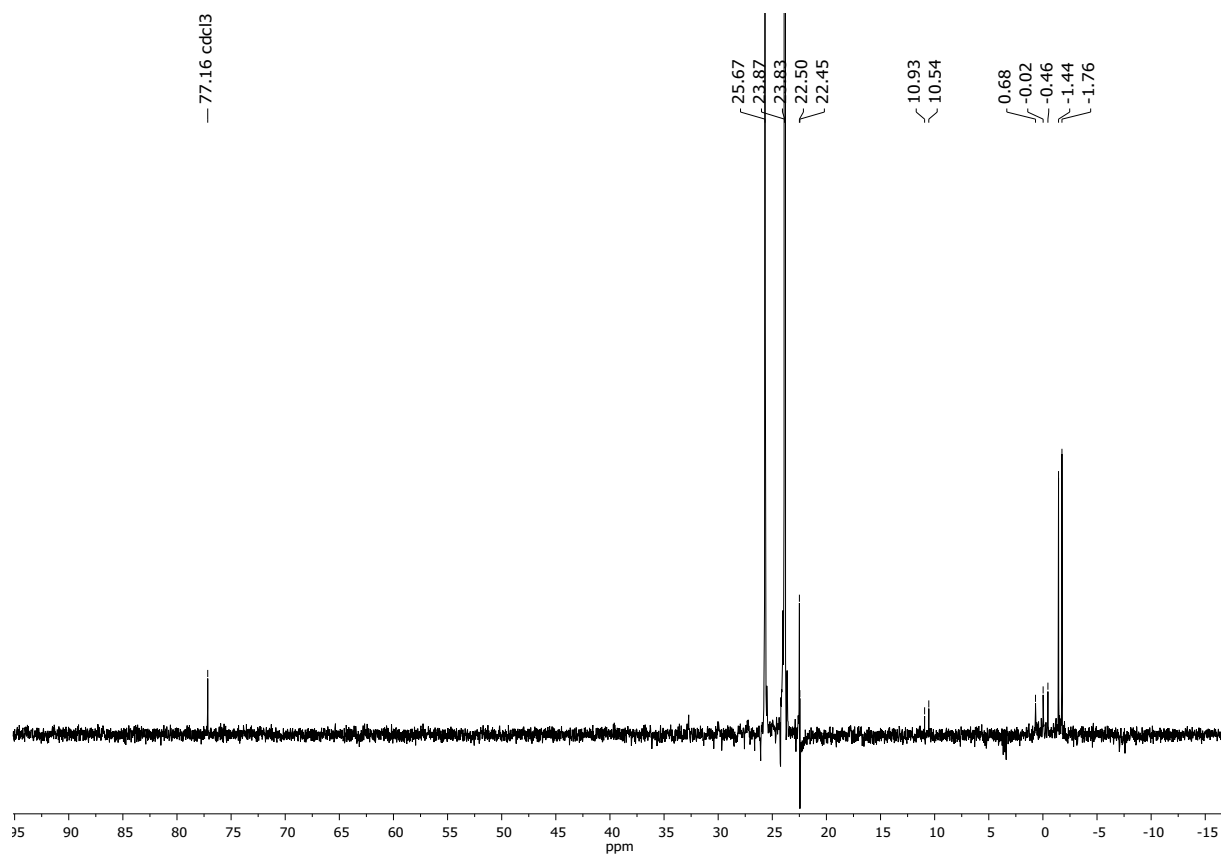

Figure S13 DEPT-135 (101 MHz, CDCl<sub>3</sub>) spectrum of G2-2iBu-4H.

## G0-1Ph-1H

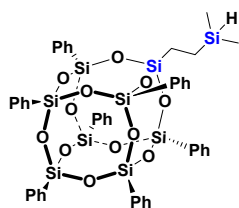

White solid. Isolated Yield 53%

<sup>1</sup>H NMR (300 MHz, CDCl<sub>3</sub>, ppm): δ = 0.03 (d, *J*<sub>H-H</sub> = 3.6 Hz, 6H, -CH<sub>3</sub>), 0.69-0.85 (m, 4H, Si-CH<sub>2</sub>-), 3.81-3.88 (m, 2H, -Si-H), 7.33-7.49 (m, 23H, -Ph), 7.73-7.78 (m, 15H, -Ph).

<sup>13</sup>C NMR (101 MHz, CDCl<sub>3</sub>, ppm): δ = -4.77 (Si-CH<sub>3</sub>), 5.07 (Si-CH<sub>2</sub>-), 5.62 (Si-CH<sub>2</sub>-) 128.00, 130.38-130.43, 130.65, 130.88, 134.33-134.35 (-Ph).

<sup>29</sup>Si NMR (79.50 MHz, CDCl<sub>3</sub>, ppm): δ = -9.96 (-Si-H), -64.91 (-Si-CH<sub>2</sub>-), -78.31, -78.65, -78.79 (-Si-Ph).

IR (ATR, cm<sup>-1</sup>): 3072.92, 3051.03, 3027.73 (C-H phenyl), 2957.13, 2918.07 (C-H), 2103.87 (Si-H), 1593.94, 1430.53 (C=C phenyl), 1191.12, 1132.34, 1082.74, 1027.83 (Si-O-Si), 996.63 (C-H phenyl), 883.73 (Si-H).

EA: Anal. calcd for C<sub>46</sub>H<sub>46</sub>O<sub>12</sub>Si<sub>9</sub> (%): C, 52.94, H, 4.44; found: C, 53.15; H, 4.46.

GPC: *M*<sub>w</sub> = 825; *M*<sub>n</sub> = 666; *D* = 1.24.

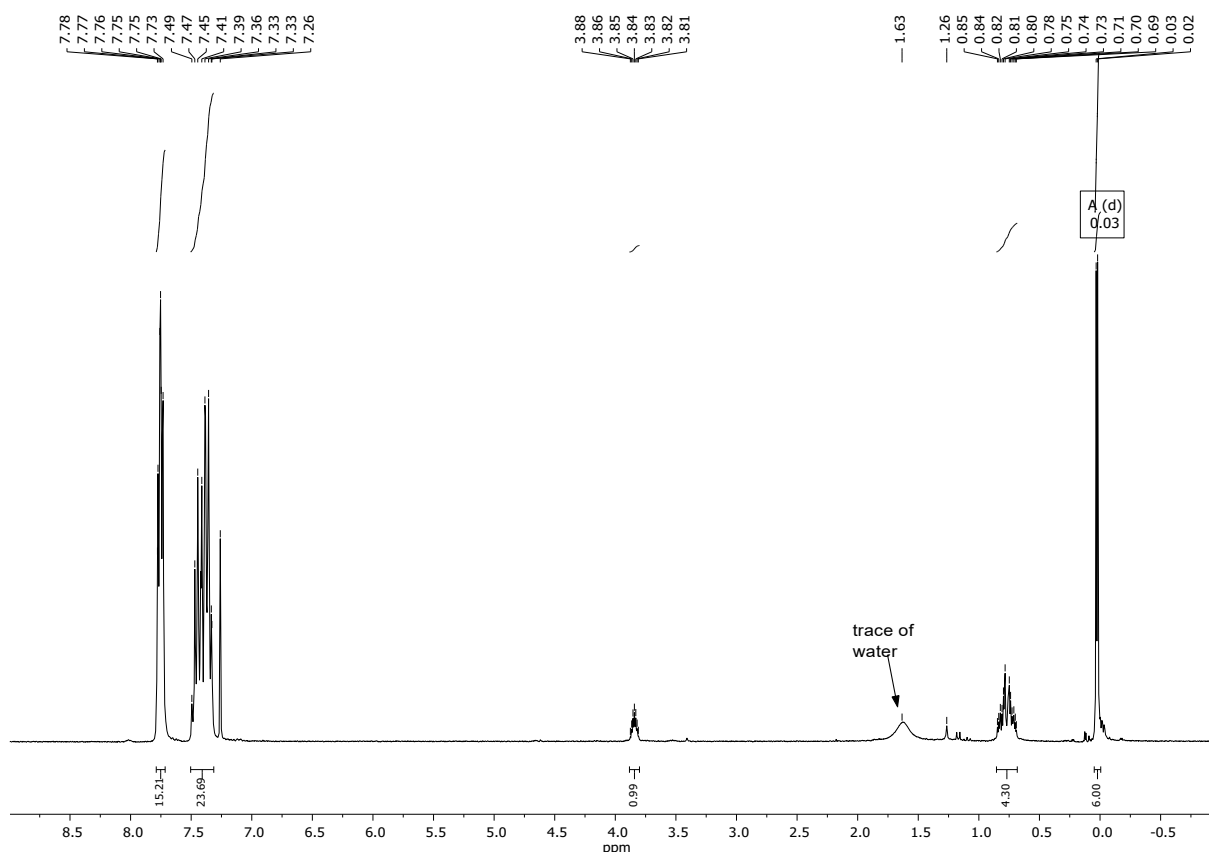

Figure S14 <sup>1</sup>H NMR (300 MHz, CDCl<sub>3</sub>) spectrum of G0-1Ph-1H.

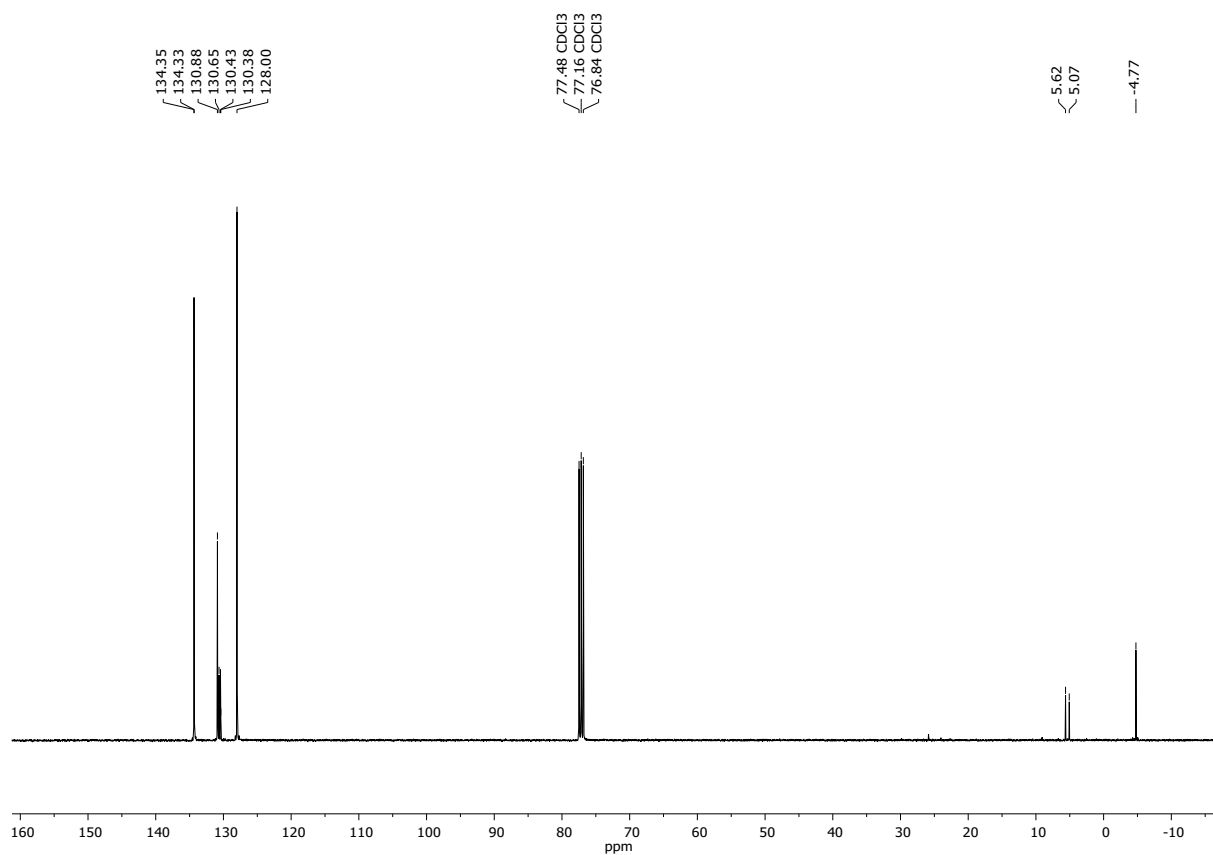

Figure S15  $^{13}\text{C}$  NMR (101 MHz,  $\text{CDCl}_3$ ) spectrum of **G0-1Ph-1H**.

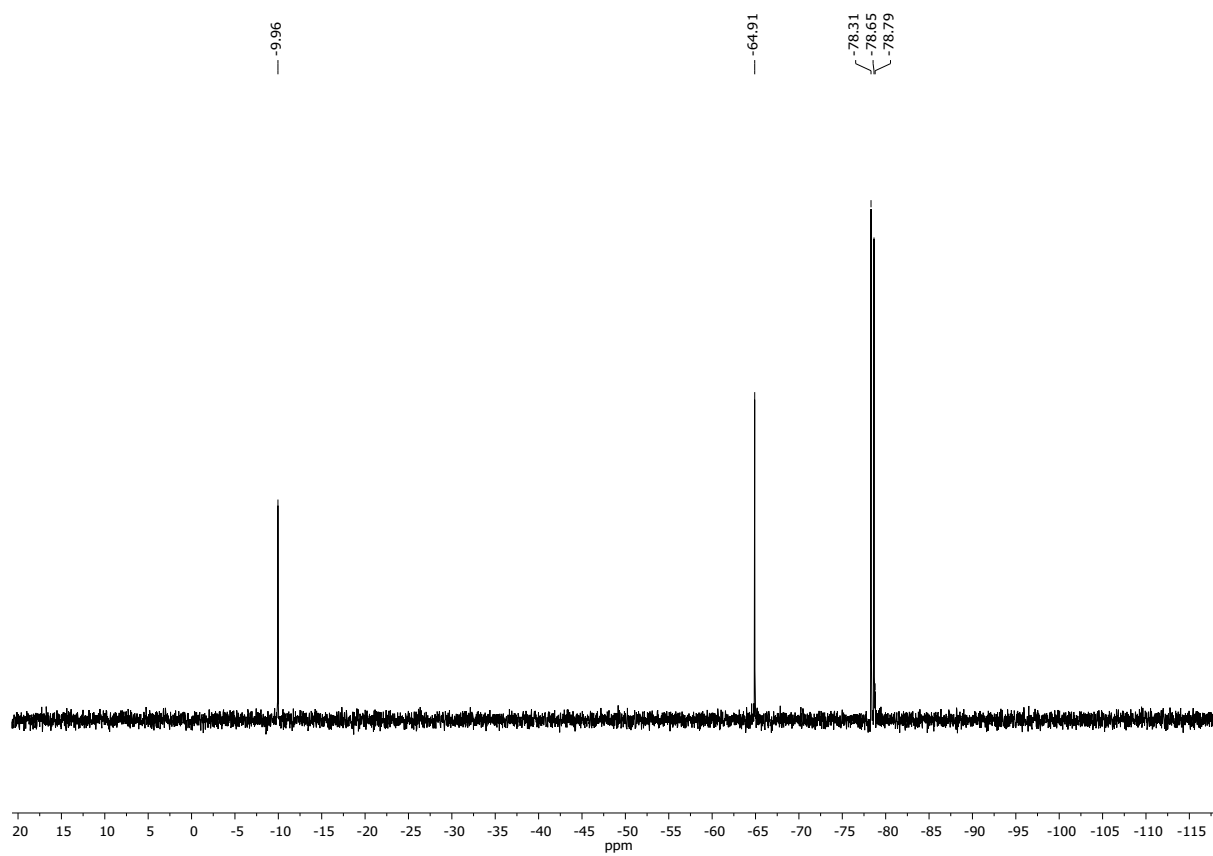

Figure S16  $^1\text{H}$  NMR (79.50 MHz,  $\text{CDCl}_3$ ) spectrum of **G0-1Ph-1H**.

## G1-1Ph-2H

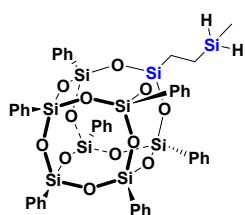

White solid. Isolated Yield 72%

$^1\text{H NMR}$  (300 MHz,  $\text{CDCl}_3$ , ppm):  $\delta$  = 0.08 (t,  $J_{\text{H-H}} = 4.1$  Hz, 3H,  $-\text{CH}_3$ ), 0.80-0.90 (m, 4H,  $-\text{Si-CH}_2-$ ), 3.69-3.73 (m, 2H,  $-\text{Si-H}$ ), 7.34-7.50 (m, 22H,  $-\text{Ph}$ ), 7.73-7.78 (m, 14H,  $-\text{Ph}$ ).

$^{13}\text{C NMR}$  (75.50 MHz,  $\text{CDCl}_3$ , ppm):  $\delta$  = -8.68 ( $-\text{Si-CH}_3$ ), 2.39 ( $-\text{Si-CH}_2-$ ), 6.19 ( $-\text{Si-CH}_2-$ ), 128.00-128.02, 130.36-130.41, 130.59, 130.90, 134.32-134.34 ( $-\text{Ph}$ ).

$^{29}\text{Si NMR}$  (79.50 MHz,  $\text{CDCl}_3$ , ppm):  $\delta$  = -29.32 ( $-\text{Si-H}$ ), -65.43 ( $-\text{Si-CH}_2-$ ), -78.33, -78.66 ( $-\text{Si-Ph}$ ).

**IR** (ATR,  $\text{cm}^{-1}$ ): 3073.06, 3051.25, 3028.00 (C-H phenyl), 2921.19 (C-H), 2126.47 (Si-H), 1593.96, 1430.56 (C=C phenyl), 1191.09, 1132.78, 1085.13, 1028.00, (Si-O-Si), 996.83 (C-H phenyl), 897.46 (Si-H).

**EA:** Anal. calcd for  $\text{C}_{45}\text{H}_{44}\text{O}_{12}\text{Si}_9$  (%): C, 52.50, H, 4.31; found: C, 52.71; H, 4.33.

**GPC:**  $M_w = 785$ ;  $M_n = 643$ ;  $D = 1.22$ .

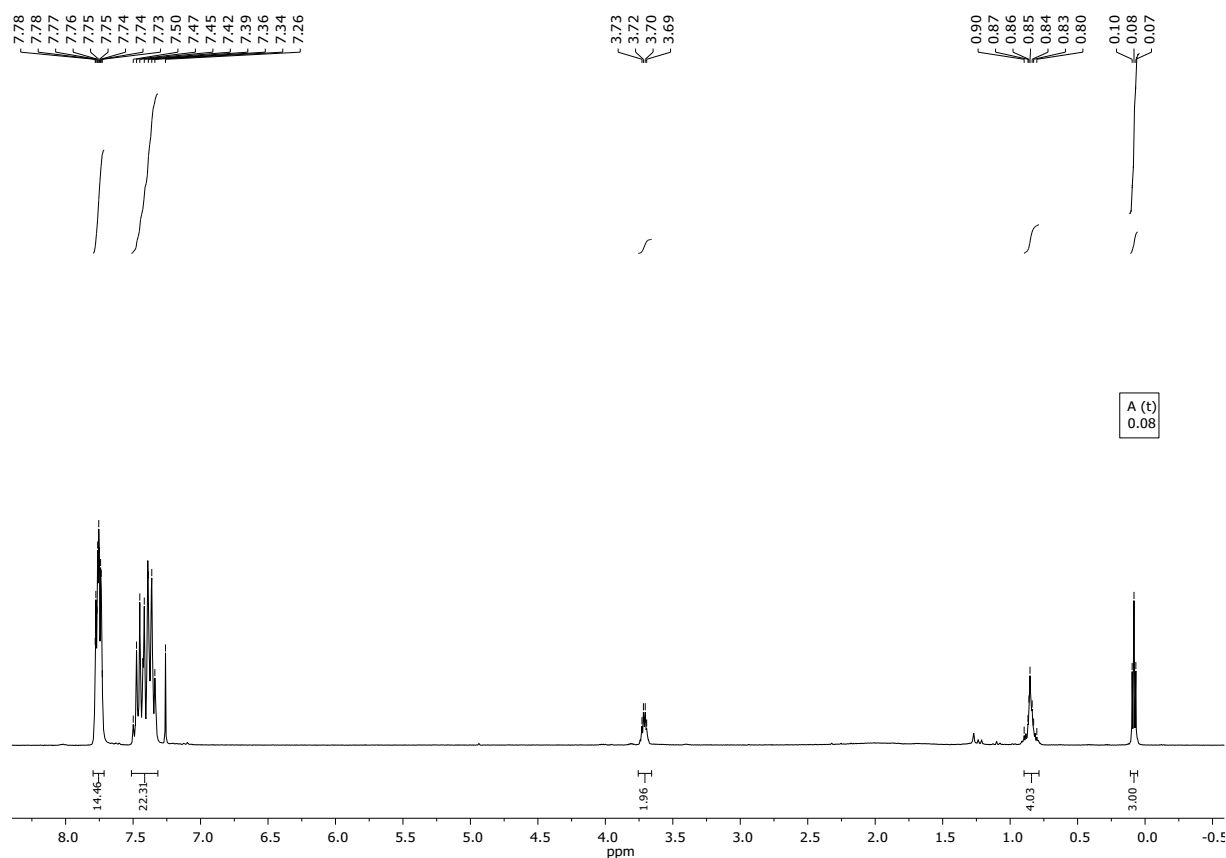

**Figure S17**  $^1\text{H NMR}$  (300 MHz,  $\text{CDCl}_3$ ) spectrum of **G1-1Ph-2H**.

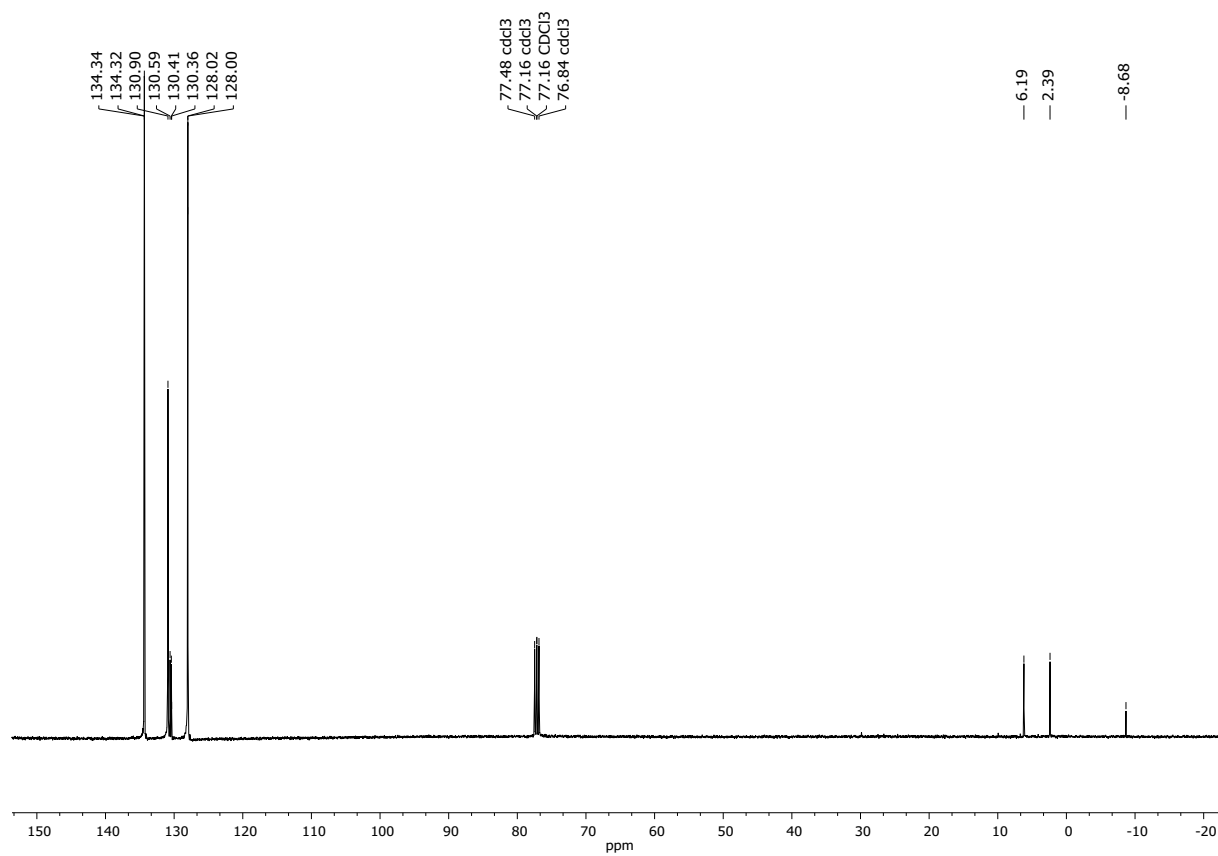

**Figure S18**  $^{13}\text{C}$  NMR (101 MHz,  $\text{CDCl}_3$ ) spectrum of **G1-1Ph-2H**.

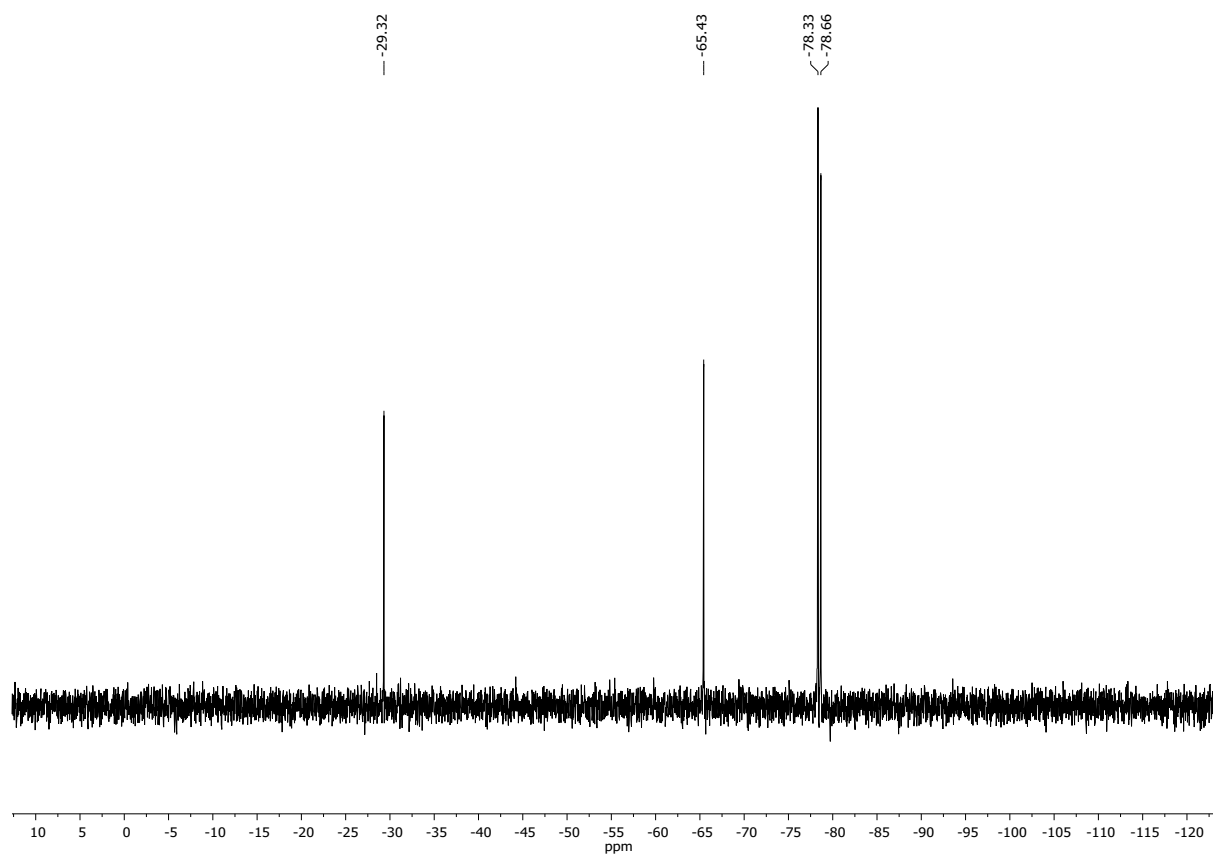

**Figure S19**  $^{29}\text{Si}$  NMR (79.50 MHz,  $\text{CDCl}_3$ ) spectrum of **G1-1Ph-2H**.



## G0-2D-2H

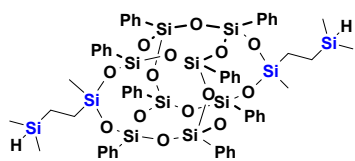

White solid. Isolated Yield 91%

$^1\text{H NMR}$  (300 MHz,  $\text{CDCl}_3$ , ppm):  $\delta = -0.09$  (d,  $J_{\text{H-H}}=6.6$  Hz, 12H,  $-\text{CH}_3$ ), 0.28 (s, 6H,  $-\text{CH}_3$ ), 0.55-0.68 (m, 8H,  $\text{Si-CH}_2$ ), 3.74 (dt,  $J_{\text{H-H}}=6.8, 3.4$  Hz, 2H,  $-\text{Si-H}$ ), 7.16-7.55 (m, 40H,  $-\text{Ph}$ ).

$^{13}\text{C NMR}$  (101 MHz,  $\text{CDCl}_3$ , ppm):  $\delta = -4.86$  ( $\text{Si-CH}_3$ ),  $-1.42$  ( $\text{Si-CH}_3$ ), 5.37 ( $\text{Si-CH}_2$ ), 9.74 ( $\text{Si-CH}_2$ ), 127.76, 127.90, 130.44, 131.24, 132.31, 134.09, 134.21 ( $-\text{Ph}$ ).

$^{29}\text{Si NMR}$  (79.50 MHz,  $\text{CDCl}_3$ , ppm):  $\delta = -9.76$  ( $-\text{Si-H}$ ),  $-17.50$  ( $-\text{Si}(\text{CH}_3)-$ ),  $-78.68$ ,  $-79.65$  ( $-\text{Si-Ph}$ ).

**IR** (ATR,  $\text{cm}^{-1}$ ): 3072.06, 3050.62 (C-H phenyl), 2955.52, 2915.23 (C-H), 2109.39 (Si-H), 1593.53, 1429.33 (C=C phenyl), 1247.32 (Si-C), 1081.98, 1028.47 (Si-O-Si), 997.37 (C-H phenyl), 884.62 (Si-H).

**EA:** Anal. calcd for  $\text{C}_{58}\text{H}_{68}\text{O}_{14}\text{Si}_{12}$  (%): C, 52.53, H, 5.17; found: C, 52.74; H, 5.19.

**GPC:**  $M_w = 1106$ ;  $M_n = 954$ ;  $D = 1.16$ .

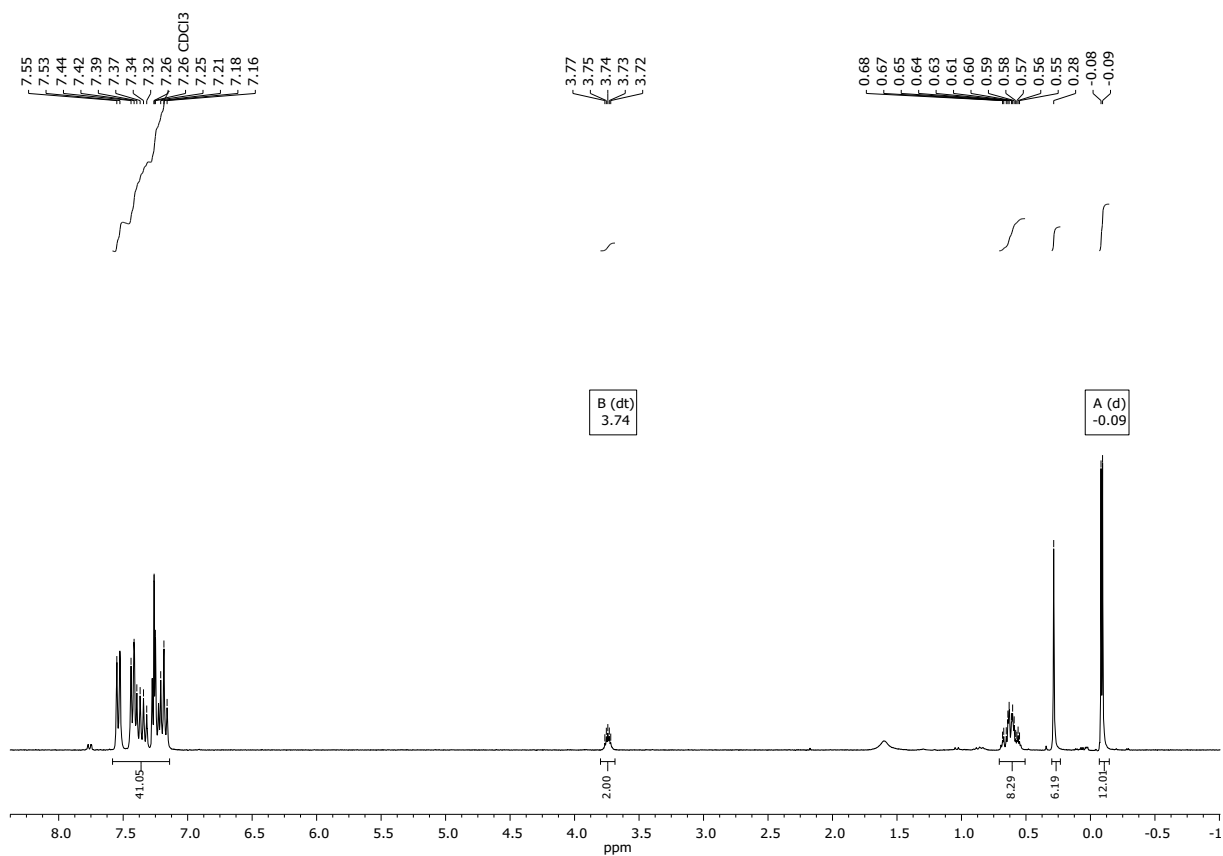

**Figure S20**  $^1\text{H NMR}$  (300 MHz,  $\text{CDCl}_3$ ) spectrum of G0-2D-2H.

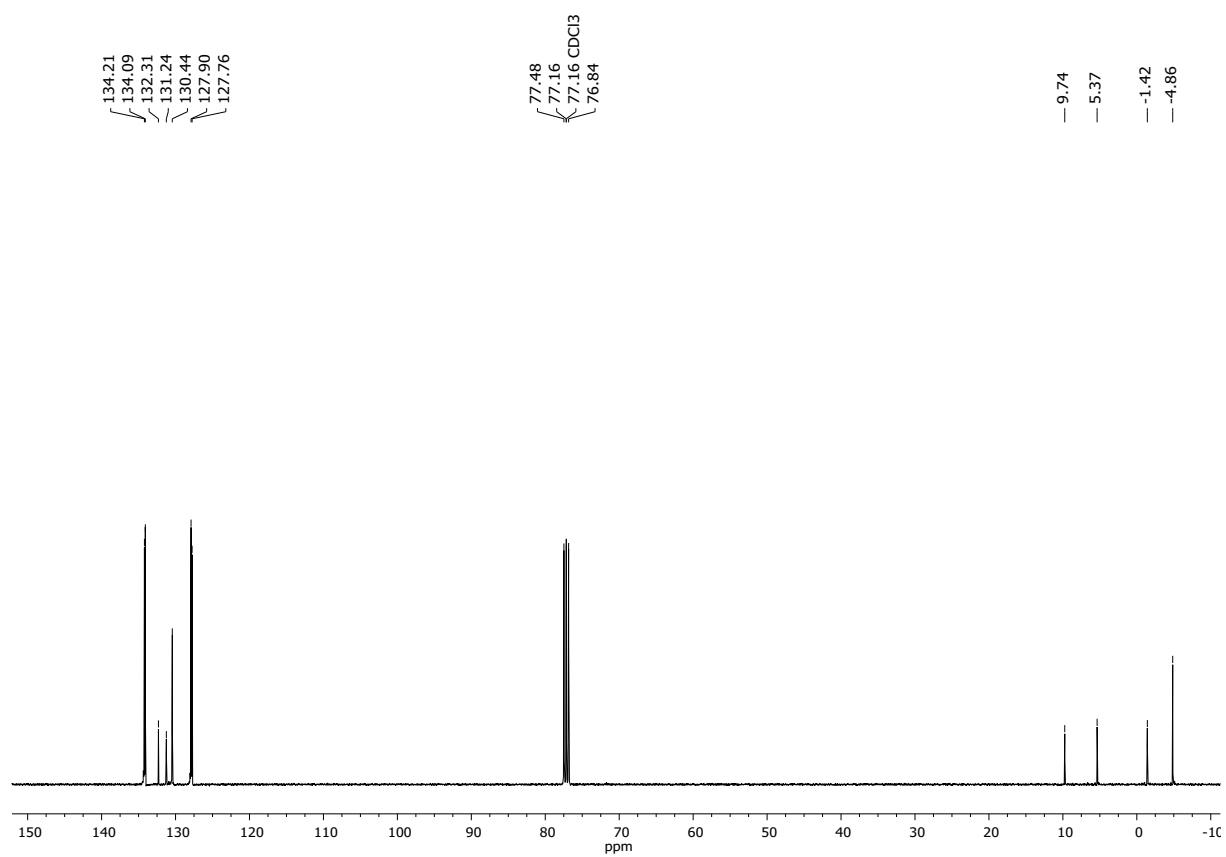

**Figure S21**  $^{13}\text{C}$  NMR (101 MHz,  $\text{CDCl}_3$ ) spectrum of **G0-2D-2H**.

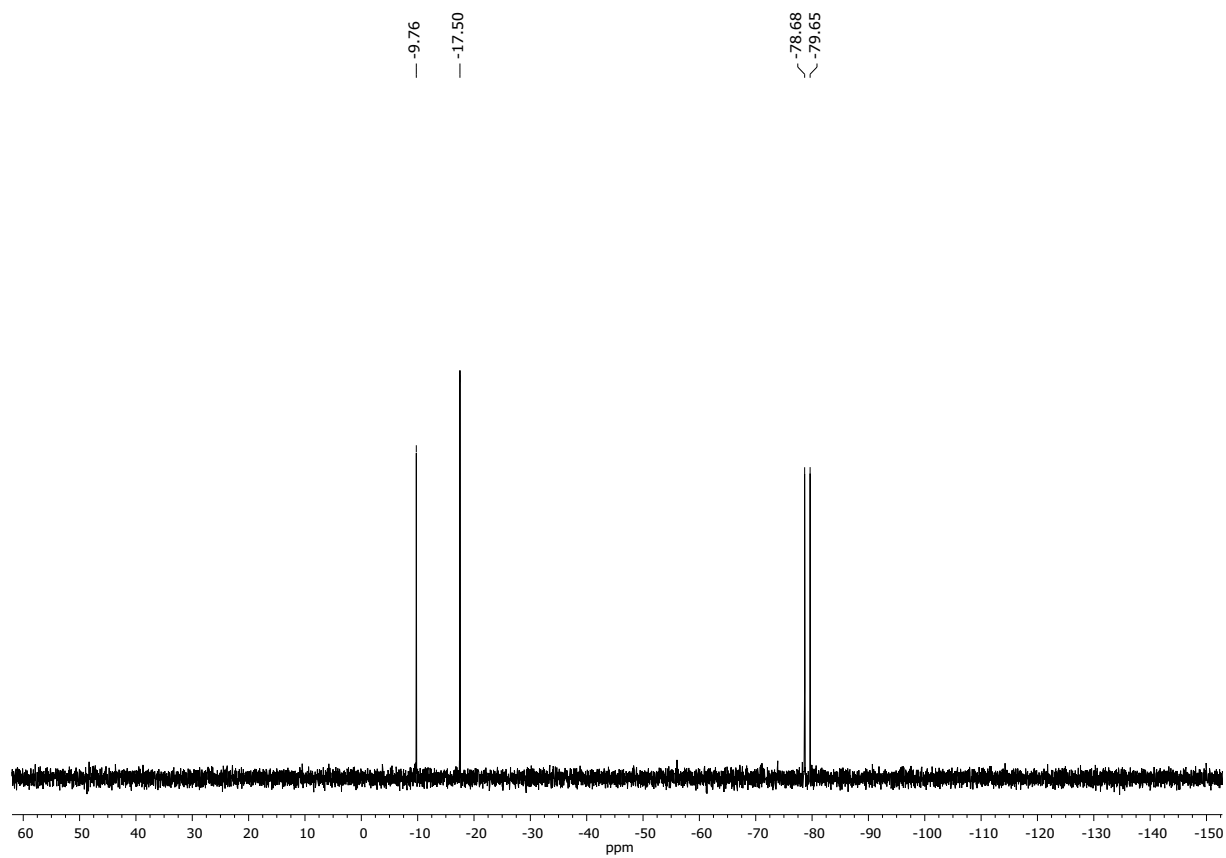

**Figure S22**  $^{29}\text{Si}$  NMR (79.50 MHz,  $\text{CDCl}_3$ ) spectrum of **G0-2D-2H**.

## G1-2D-4H

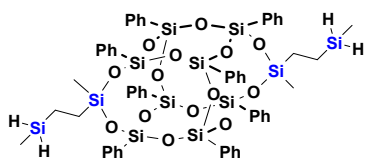

White solid. Isolated Yield 85%

$^1\text{H NMR}$  (300 MHz,  $\text{CDCl}_3$ , ppm):  $\delta = -0.03$  (t,  $J_{\text{H-H}}=4.0$  Hz, 6H,  $-\text{CH}_3$ ), 0.30 (s, 6H,  $-\text{CH}_3$ ), 0.71 (s, 8H,  $\text{Si-CH}_2-$ ), 3.63 (q,  $J_{\text{H-H}}= 3.6$  Hz, 4H,  $-\text{Si-H}$ ), 7.17-7.55 (m, 40H,  $-\text{Ph}$ ).

$^{13}\text{C NMR}$  (101 MHz,  $\text{CDCl}_3$ , ppm):  $\delta = -8.73$  ( $\text{Si-CH}_3$ ),  $-1.39$  ( $\text{Si-CH}_3$ ), 2.16 ( $\text{Si-CH}_2-$ ), 10.89 ( $\text{Si-CH}_2-$ ) 127.78, 127.93, 130.47, 131.18, 132.23, 134.07, 134.20 ( $-\text{Ph}$ ).

$^{29}\text{Si NMR}$  (79.50 MHz,  $\text{CDCl}_3$ , ppm):  $\delta = -17.97$  ( $-\text{Si}(\text{CH}_3)-$ ),  $-29.03$  ( $-\text{Si-H}$ ),  $-78.64$ ,  $-79.61$  ( $-\text{Si-Ph}$ ).

**IR** (ATR,  $\text{cm}^{-1}$ ): 3071.80, 3050.96 (C-H phenyl), 2954.83, 2921.75, 2852.53 (C-H), 2126.30 (Si-H), 1593.50, 1429.26 (C=C phenyl), 1264.13 (Si-C), 1085.31, 1028.99 (Si-O-Si), 997.36 (C-H phenyl), 893.18 (Si-H).

**EA:** Anal. calcd for  $\text{C}_{56}\text{H}_{64}\text{O}_{14}\text{Si}_{12}$  (%): C, 51.81, H, 4.97; found: C, 52.02; H, 4.99.

**GPC:**  $M_w = 1033$ ;  $M_n = 878$ ;  $D = 1.18$ .

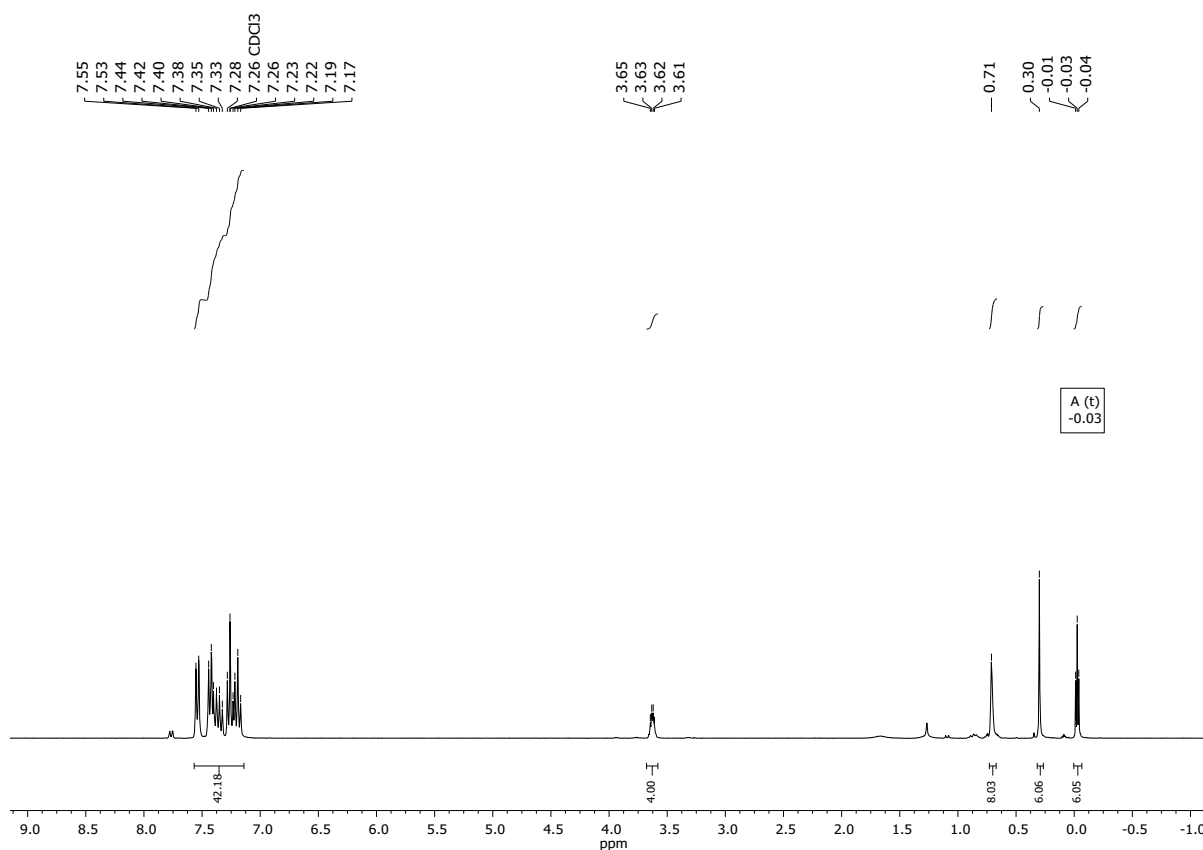

Figure S23  $^1\text{H NMR}$  (300 MHz,  $\text{CDCl}_3$ ) spectrum of G1-2D-4H.

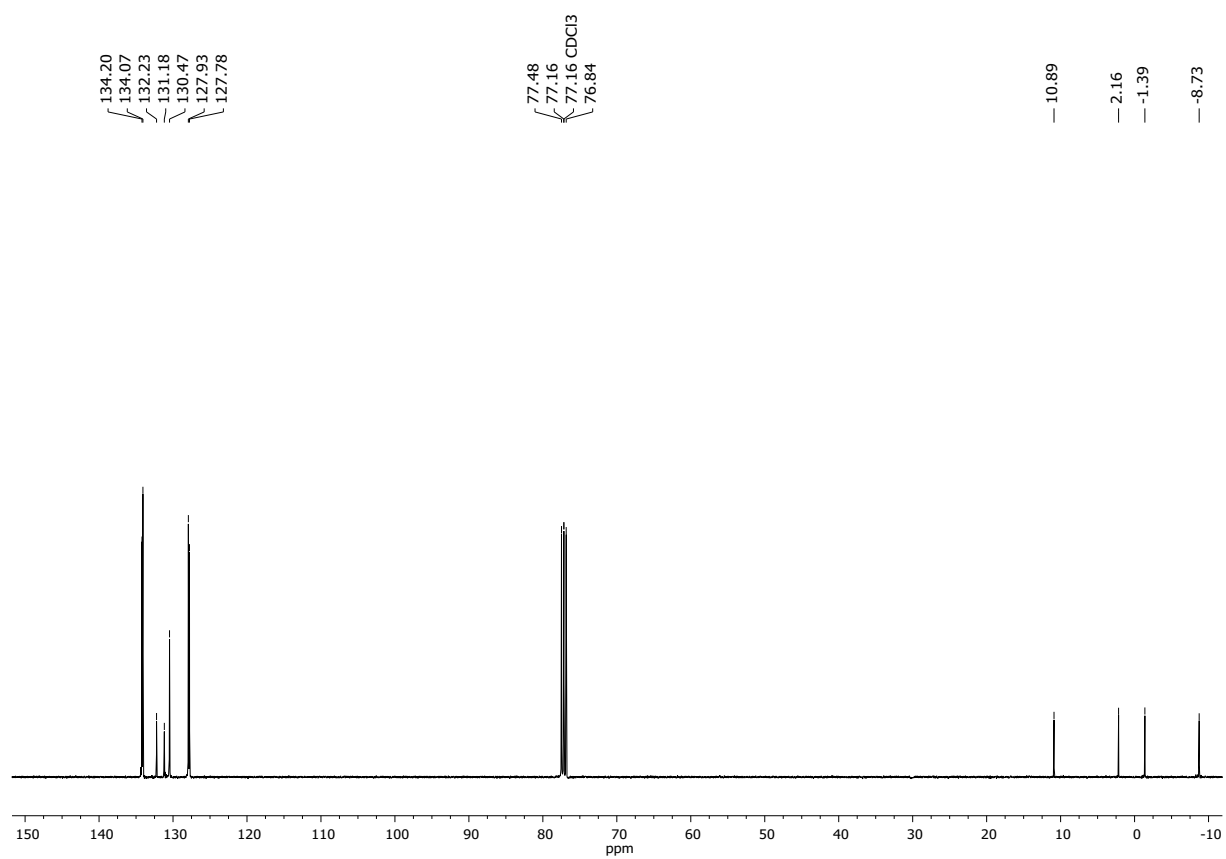

**Figure S24**  $^{13}\text{C}$  NMR (101 MHz,  $\text{CDCl}_3$ ) spectrum of **G1-2D-4H**.

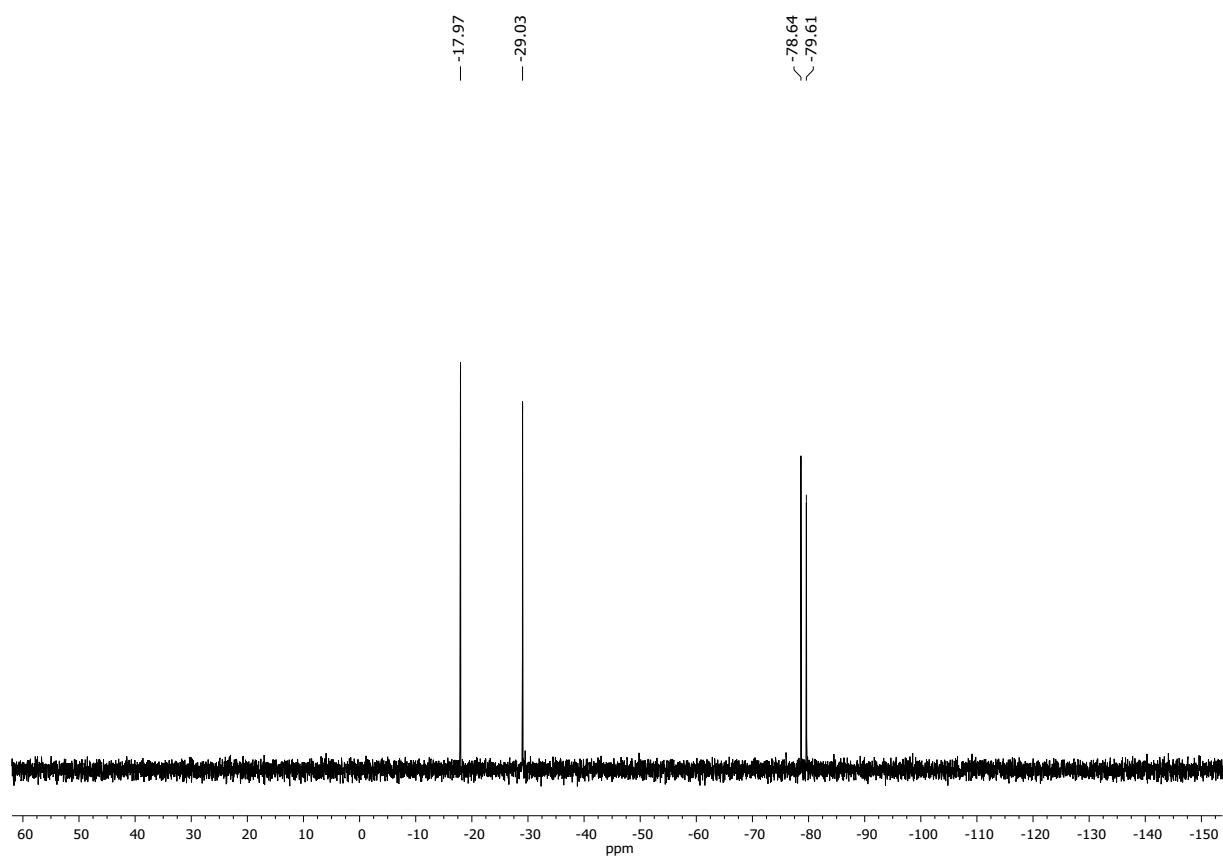

**Figure S25**  $^{29}\text{Si}$  NMR (79.50 MHz,  $\text{CDCl}_3$ ) spectrum of **G1-2D-4H**.

## G0-4D-4H

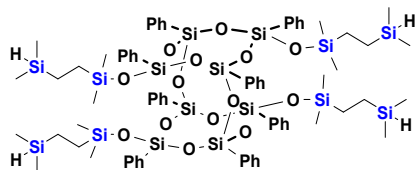

White solid. Isolated Yield 94%

$^1\text{H NMR}$  (300 MHz,  $\text{CDCl}_3$ , ppm):  $\delta = -0.21$  (d,  $J_{\text{H-H}}=3.6$  Hz, 24H,  $-\text{CH}_3$ ), 0.00 (s, 24H,  $-\text{CH}_3$ ), 0.18-0.23 (m, 8H,  $\text{Si-CH}_2-$ ), 0.33-0.39 (m, 8H,  $\text{Si-CH}_2-$ ), 3.57 (dt,  $J_{\text{H-H}}= 6.8, 3.4$  Hz, 4H,  $-\text{Si-H}$ ), 7.08-7.45 (m, 40H,  $-\text{Ph}$ ).

$^{13}\text{C NMR}$  (101 MHz,  $\text{CDCl}_3$ , ppm):  $\delta = -4.93$  ( $\text{Si-CH}_3$ ), 0.40 ( $\text{Si-CH}_3$ ), 5.68 ( $\text{Si-CH}_2-$ ), 10.80 ( $\text{Si-CH}_2-$ ) 127.56, 127.60, 129.85, 130.22, 131.87, 133.71, 134.41, 134.47 ( $-\text{Ph}$ ).

$^{29}\text{Si NMR}$  (79.50 MHz,  $\text{CDCl}_3$ , ppm):  $\delta = 11.45$  ( $-\text{Si}-(\text{CH}_3)_2$ ),  $-10.14$  ( $-\text{Si-H}$ ),  $-78.64$ ,  $-79.61$  ( $-\text{Si-Ph}$ ).

**IR** (ATR,  $\text{cm}^{-1}$ ): 3072.24, 3050.84 (C-H phenyl), 2954.49, 2906.60 (C-H), 2104.74 (Si-H), 1593.67, 1429.56 (C=C phenyl), 1248.53 (Si-C), 1126.83, 1100.37, 1045.14 (Si-O-Si), 998.28 (C-H phenyl), 885.41 (Si-H).

**EA:** Anal. calcd for  $\text{C}_{72}\text{H}_{108}\text{O}_{14}\text{Si}_{16}$  (%): C, 52.51, H, 6.61; found: C, 52.72; H, 6.64.

**GPC:**  $M_w = 1519$ ;  $M_n = 1343$ ;  $D = 1.13$ .

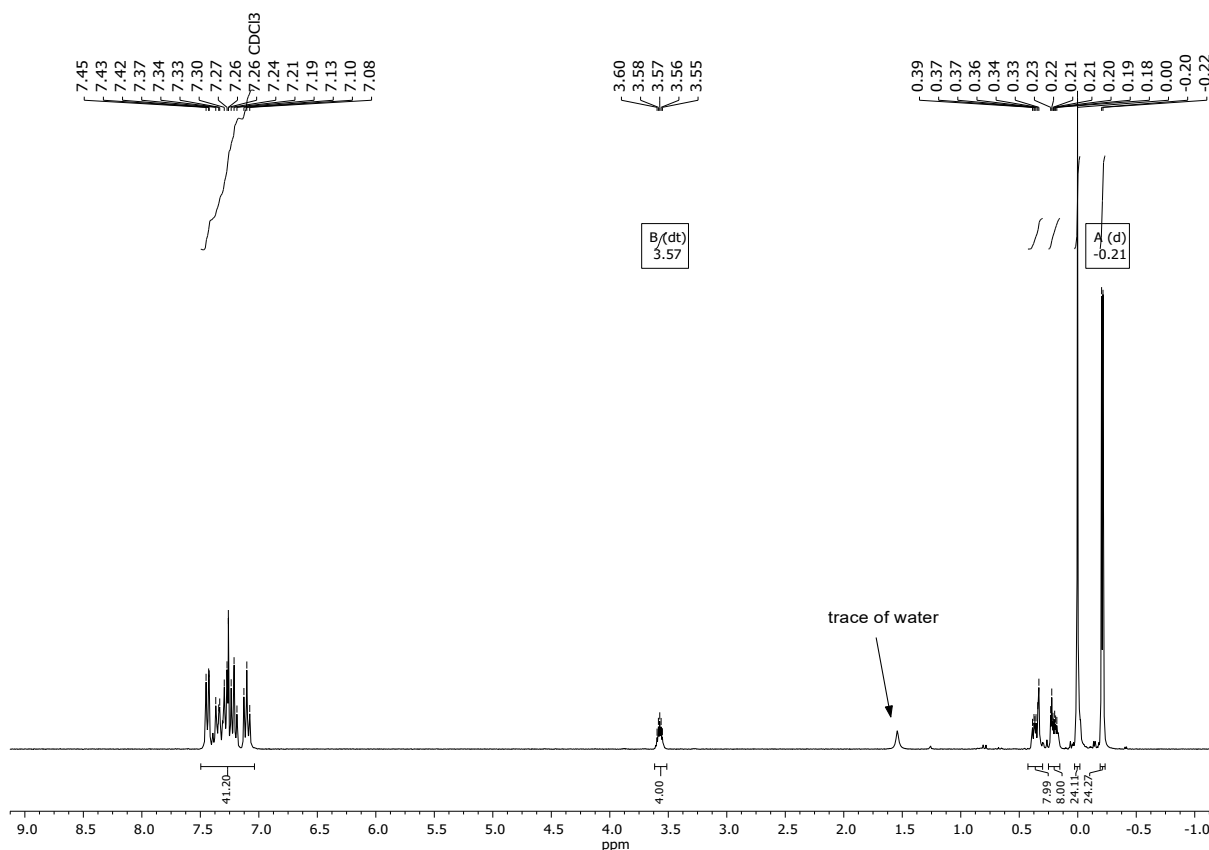

Figure S26  $^1\text{H NMR}$  (300 MHz,  $\text{CDCl}_3$ ) spectrum of G0-4D-4H.

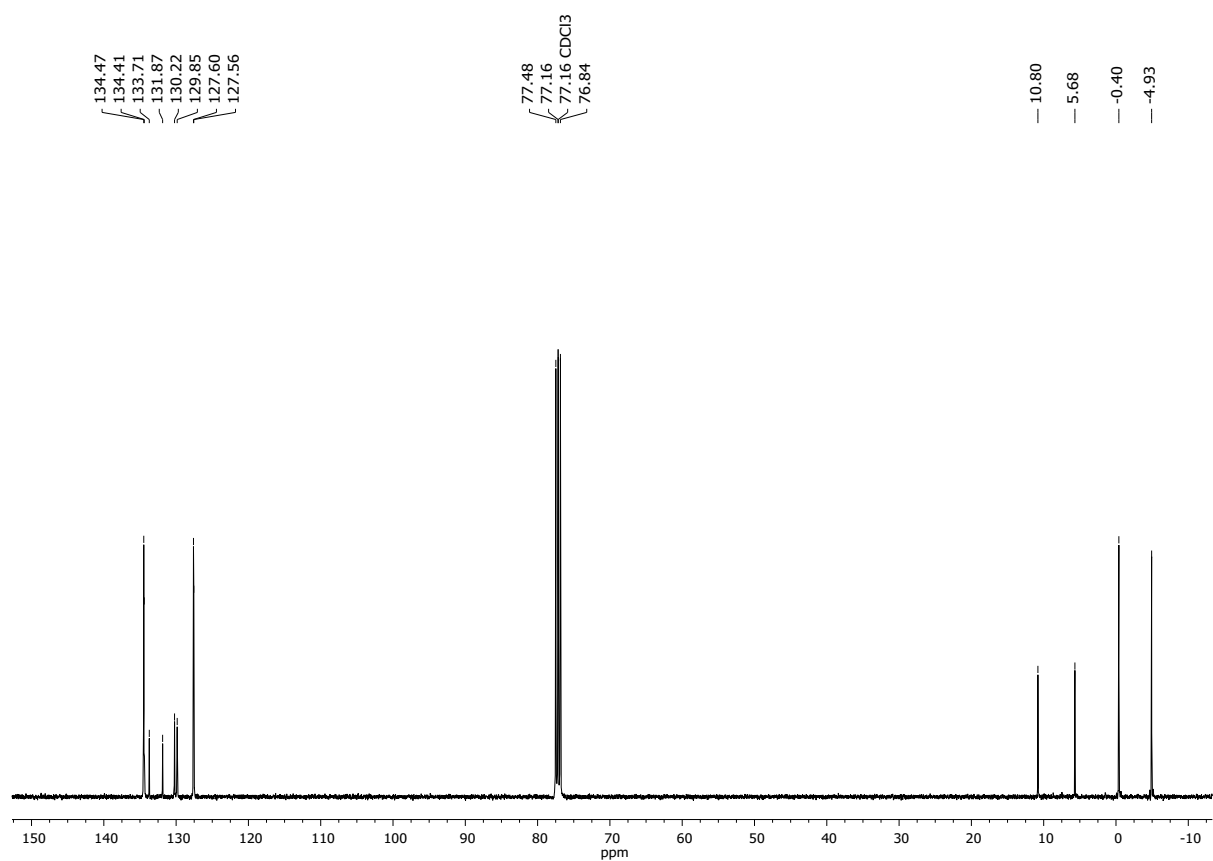

Figure S27  $^{13}\text{C}$  NMR (101 MHz,  $\text{CDCl}_3$ ) spectrum of **G0-4D-4H**.

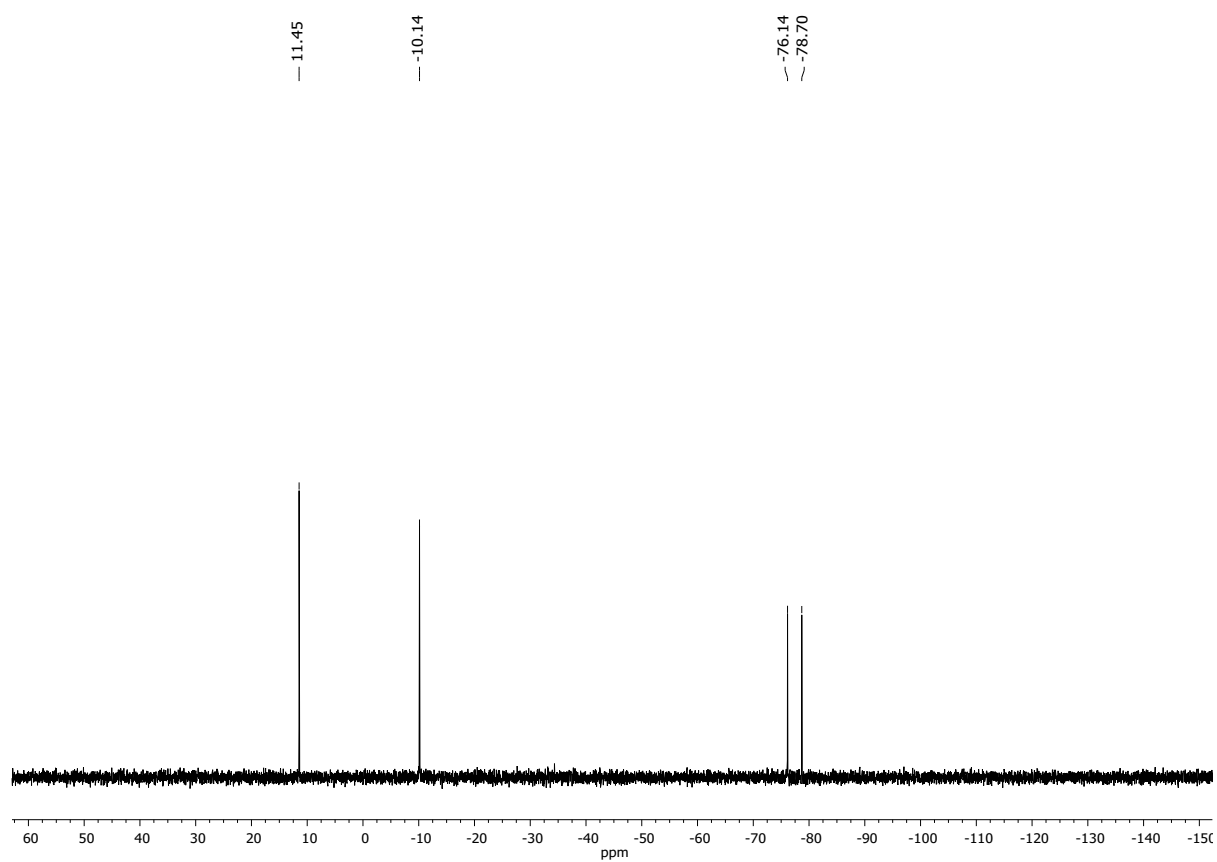

Figure S28  $^{29}\text{Si}$  NMR (79.50 MHz,  $\text{CDCl}_3$ ) spectrum of **G0-4D-4H**.



## G1-4D-8H

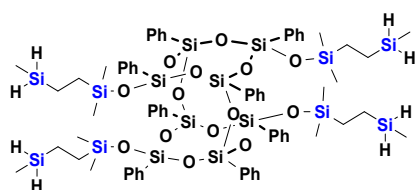

White solid. Isolated Yield 91%

$^1\text{H NMR}$  (300 MHz,  $\text{CDCl}_3$ , ppm):  $\delta$  = -0.13 (t,  $J_{\text{H-H}}=4.1$  Hz, 12H,  $-\text{CH}_3$ ), 0.03 (s, 24H,  $-\text{CH}_3$ ), 0.30-0.38 (m, 8H, Si- $\text{CH}_2$ -), 0.42-0.49 (m, 8H, Si- $\text{CH}_2$ -), 3.47 (h,  $J_{\text{H-H}}= 3.6$  Hz, 4H,  $-\text{Si-H}$ ), 7.11-7.47 (m, 40H,  $-\text{Ph}$ ).

$^{13}\text{C NMR}$  (101 MHz,  $\text{CDCl}_3$ , ppm):  $\delta$  = -8.82 (Si- $\text{CH}_3$ ), -0.36 (Si- $\text{CH}_3$ ), 2.38 (Si- $\text{CH}_2$ -), 12.00 (Si- $\text{CH}_2$ -) 127.61, 129.91, 130.27, 131.76, 133.59, 134.39, 134.46 ( $-\text{Ph}$ ).

$^{29}\text{Si NMR}$  (79.50 MHz,  $\text{CDCl}_3$ , ppm):  $\delta$  = 11.18 ( $-\text{Si}-(\text{CH}_3)_2$ ), -29.37 ( $-\text{Si-H}$ ), -76.07, -78.69 ( $-\text{Si-Ph}$ ).

**IR** (ATR,  $\text{cm}^{-1}$ ): 3072.10, 3050.82 (C-H phenyl), 2957.14, 2915.36 (C-H), 2124.73 (Si-H), 1593.63, 1429.65 (C=C phenyl), 1251.08 (Si-C), 1128.24, 1104.83, 1052.57 (Si-O-Si), 998.39 (C-H phenyl), 900.99 (Si-H).

**EA**: Anal. calcd for  $\text{C}_{68}\text{H}_{100}\text{O}_{14}\text{Si}_{16}$  (%): C, 51.34, H, 6.34; found: C, 51.55; H, 6.37.

**GPC**:  $M_w = 1387$ ;  $M_n = 1232$ ;  $D = 1.13$ .

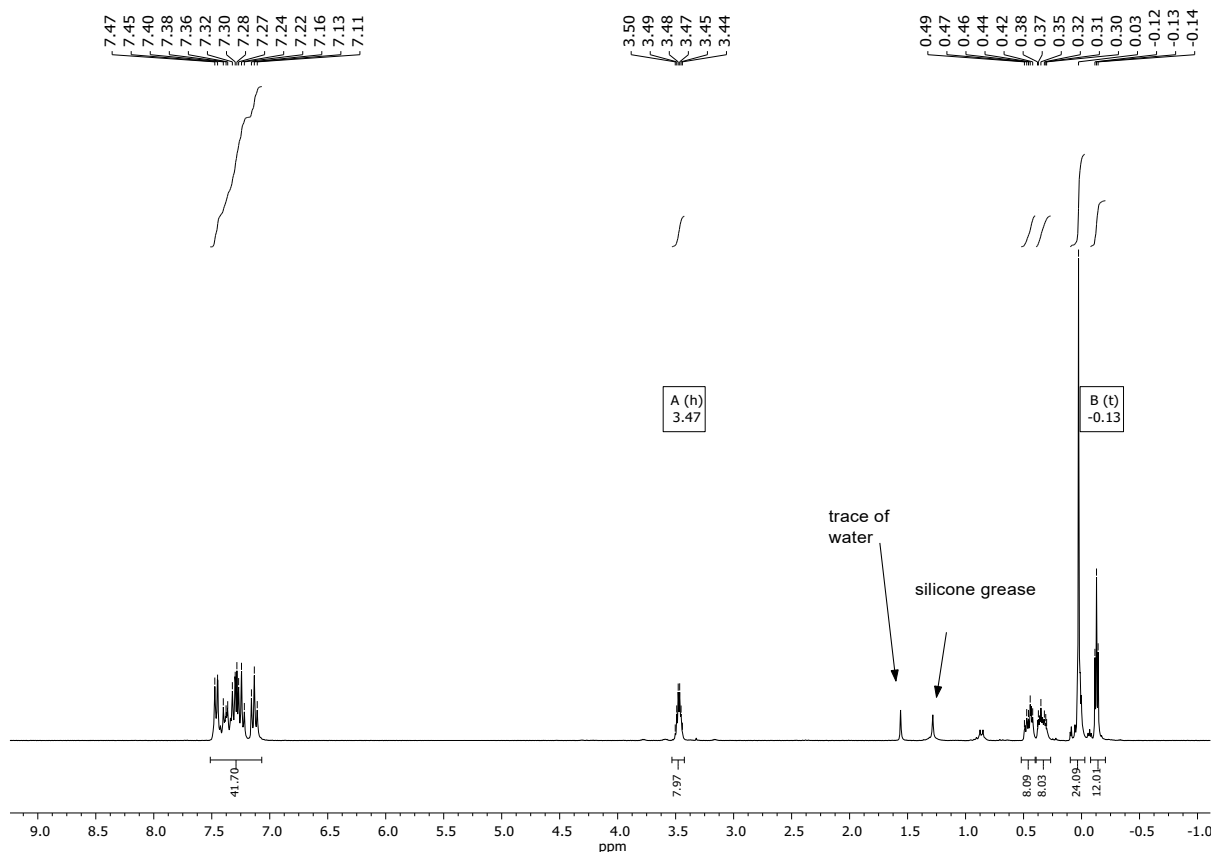

Figure S29  $^1\text{H NMR}$  (300 MHz,  $\text{CDCl}_3$ ) spectrum of G1-4D-8H.

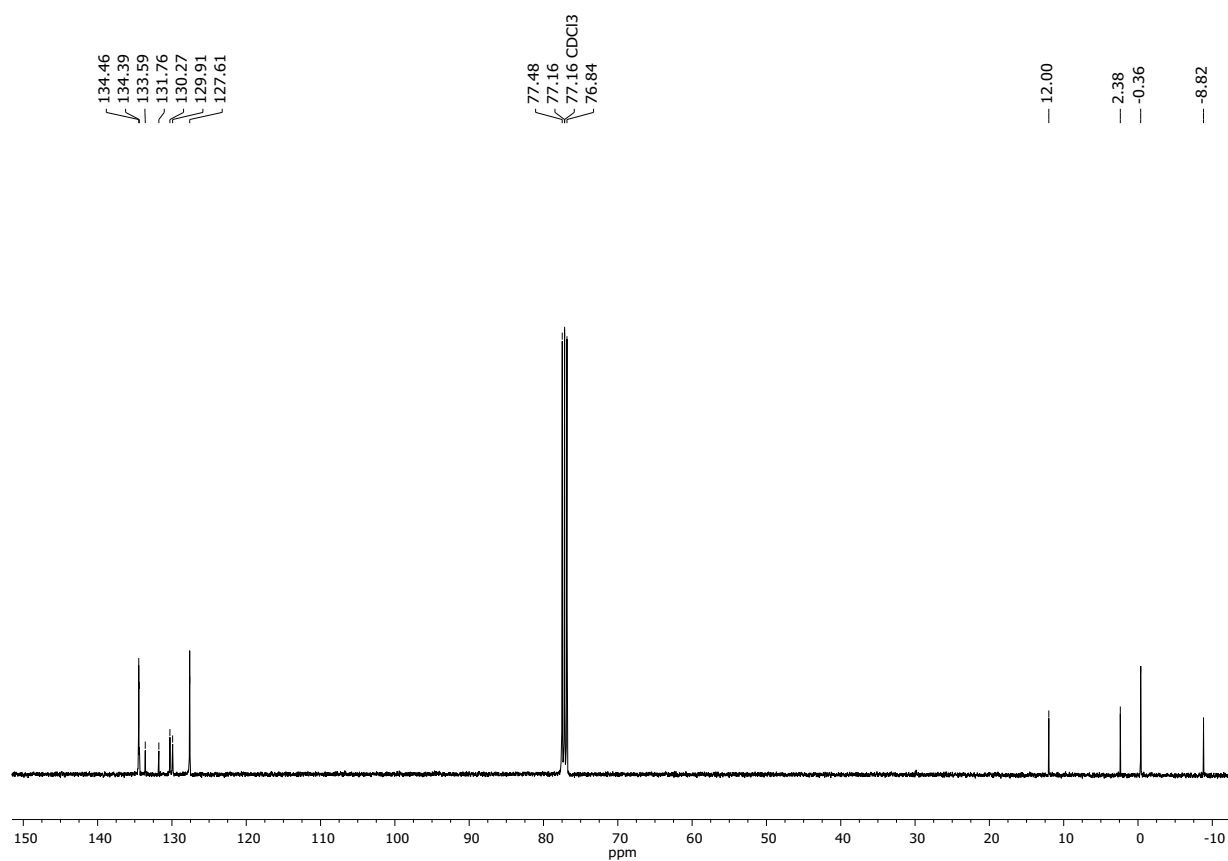

**Figure S30**  $^{13}\text{C}$  NMR (101 MHz,  $\text{CDCl}_3$ ) spectrum of **G1-4D-8H**.

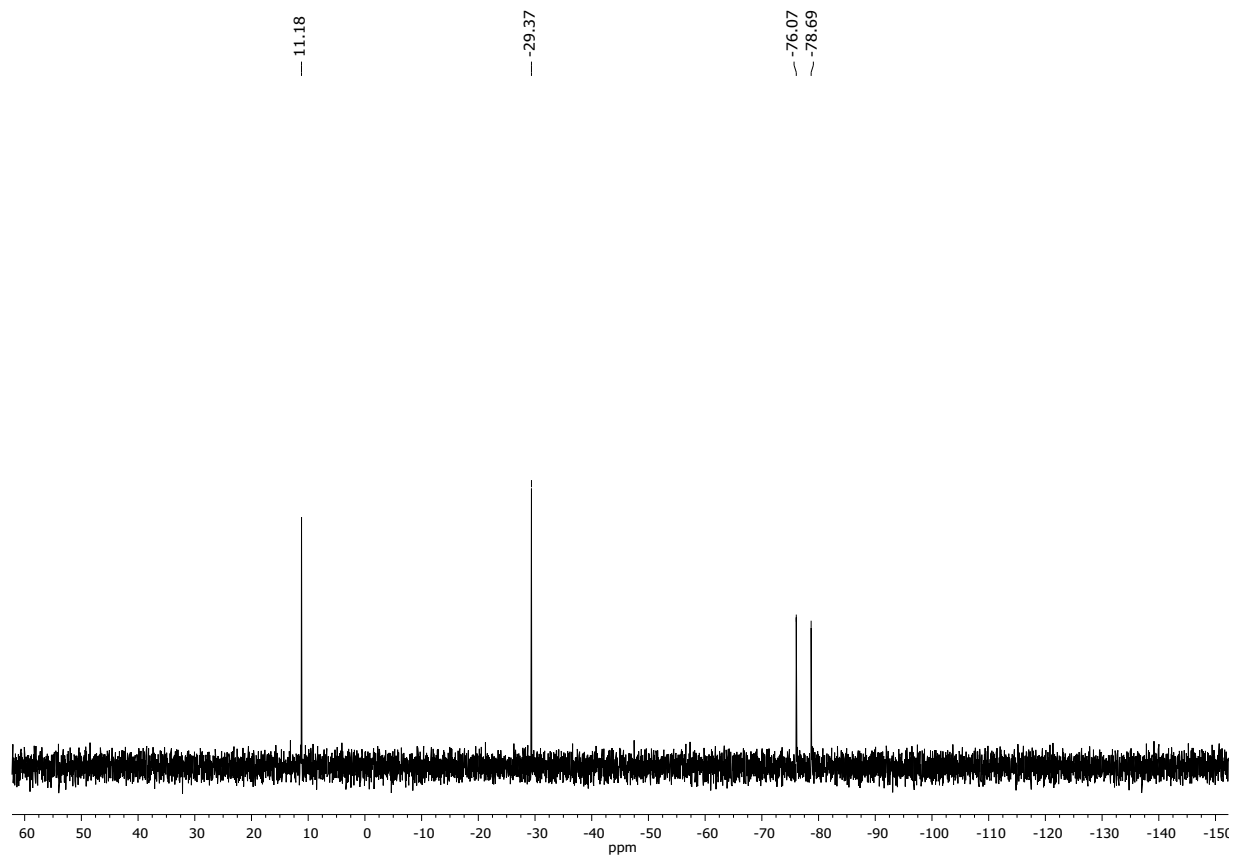

**Figure S31**  $^{29}\text{Si}$  NMR (79.50 MHz,  $\text{CDCl}_3$ ) spectrum of **G1-4D-8H**.

## G1-8D-8epoxy

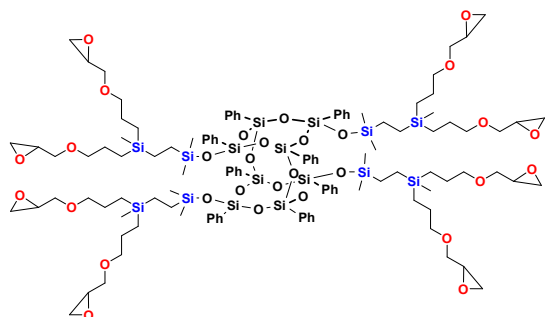

White waxy solid. Isolated Yield 85%

**<sup>1</sup>H NMR** (300 MHz, CDCl<sub>3</sub>, ppm): δ = -0.34 (s, 12H, -CH<sub>3</sub>), 0.01 (s, 24H, -CH<sub>3</sub>), 0.10-0.26 (m, 32H, Si-CH<sub>2</sub>-), 1.36 (dt, *J*<sub>H-H</sub> = 14.4, 7.1 Hz, 16H, -CH<sub>2</sub>-), 2.58 (dd, *J*<sub>H-H</sub> = 4.9, 2.6 Hz, 8H, CH<sub>2</sub>-O), 2.77 (t, *J*<sub>H-H</sub> = 4.5 Hz, 8H, CH<sub>2</sub>-O), 3.11 (dt, *J*<sub>H-H</sub> = 8.5, 4.9 Hz, 8H, CH-O), 3.27-3.36 (m, 24H, CH<sub>2</sub>-O), 3.64 (dd, *J*<sub>H-H</sub> = 11.4, 3.0 Hz, 8H, CH<sub>2</sub>-O), 7.07-7.44 (m, 40H, -Ph).

**<sup>13</sup>C NMR** (101 MHz, CDCl<sub>3</sub>, ppm): δ = -6.12 (Si-CH<sub>3</sub>), -0.45 (Si-CH<sub>3</sub>), 4.90 (Si-CH<sub>2</sub>-), 8.90 (Si-CH<sub>2</sub>-), 10.30 (-Si-CH<sub>2</sub>-), 24.02 (-CH<sub>2</sub>-), 44.45 (CHO), 50.95 (CHO), 71.51 (OCH<sub>2</sub>), 74.61 (CH<sub>2</sub>O), 127.55, 127.59, 129.87, 130.27, 131.80, 133.61, 134.31, 134.37 (-Ph).

**<sup>29</sup>Si NMR** (79.50 MHz, CDCl<sub>3</sub>, ppm): δ = 11.59 (-Si-(CH<sub>3</sub>)<sub>2</sub>), 5.48 (-Si-CH<sub>3</sub>), -76.13, -78.68 (-Si-Ph).

**IR** (ATR, cm<sup>-1</sup>): 3071.54, 3049.24, 3002.88 (C-H phenyl), 2950.25, 2923.28, 2868.39 (C-H), 1593.28, 1429.79 (C=C phenyl), 1249.94 (Si-C), 1127.10, 1096.83, 1042.86 (Si-O-Si), 997.90 (C-H phenyl).

**EA:** Anal. calcd for C<sub>116</sub>H<sub>180</sub>O<sub>30</sub>Si<sub>16</sub> (%): C, 55.64, H, 7.25; found: C, 55.86; H, 7.28.

**GPC:** M<sub>w</sub> = 2096; M<sub>n</sub> = 1819; Đ = 1.15.

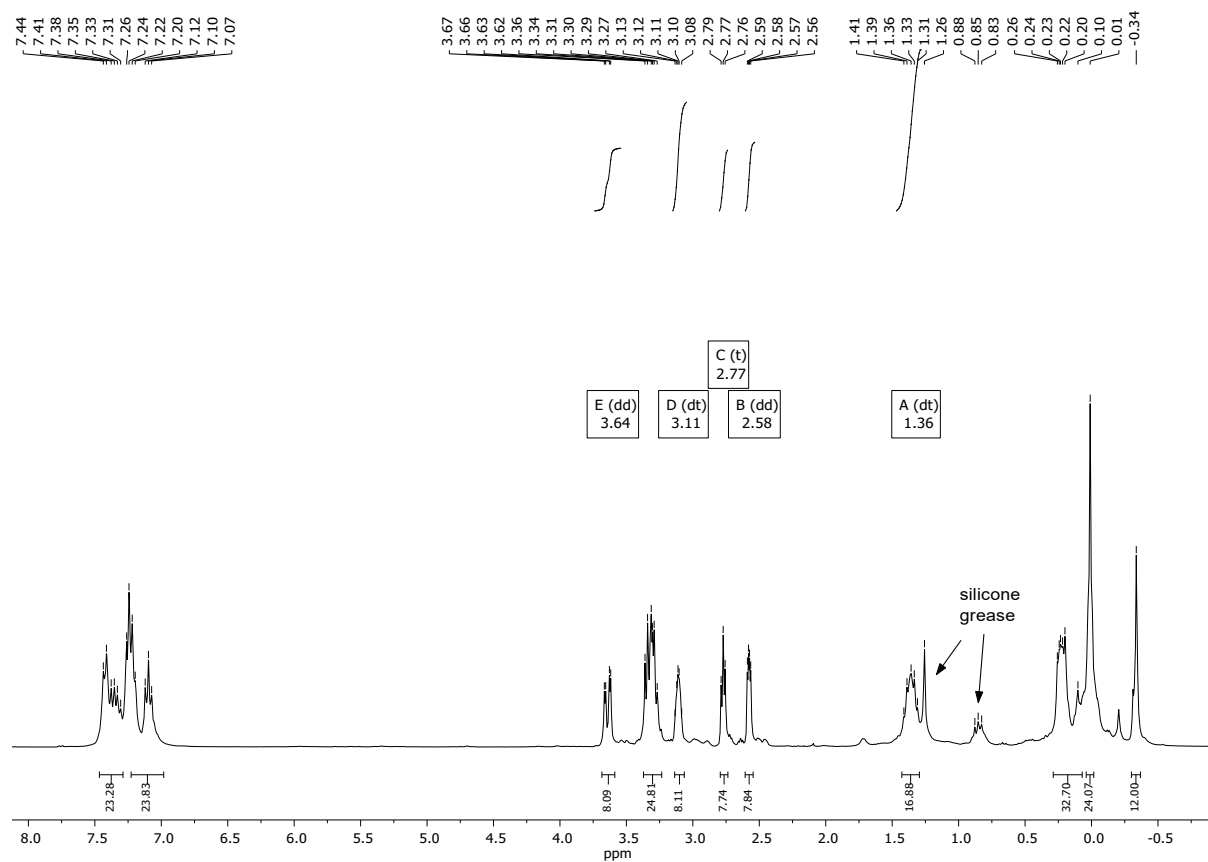

Figure S32 <sup>1</sup>H NMR (300 MHz, CDCl<sub>3</sub>) spectrum of G1-8D-8epoxy.

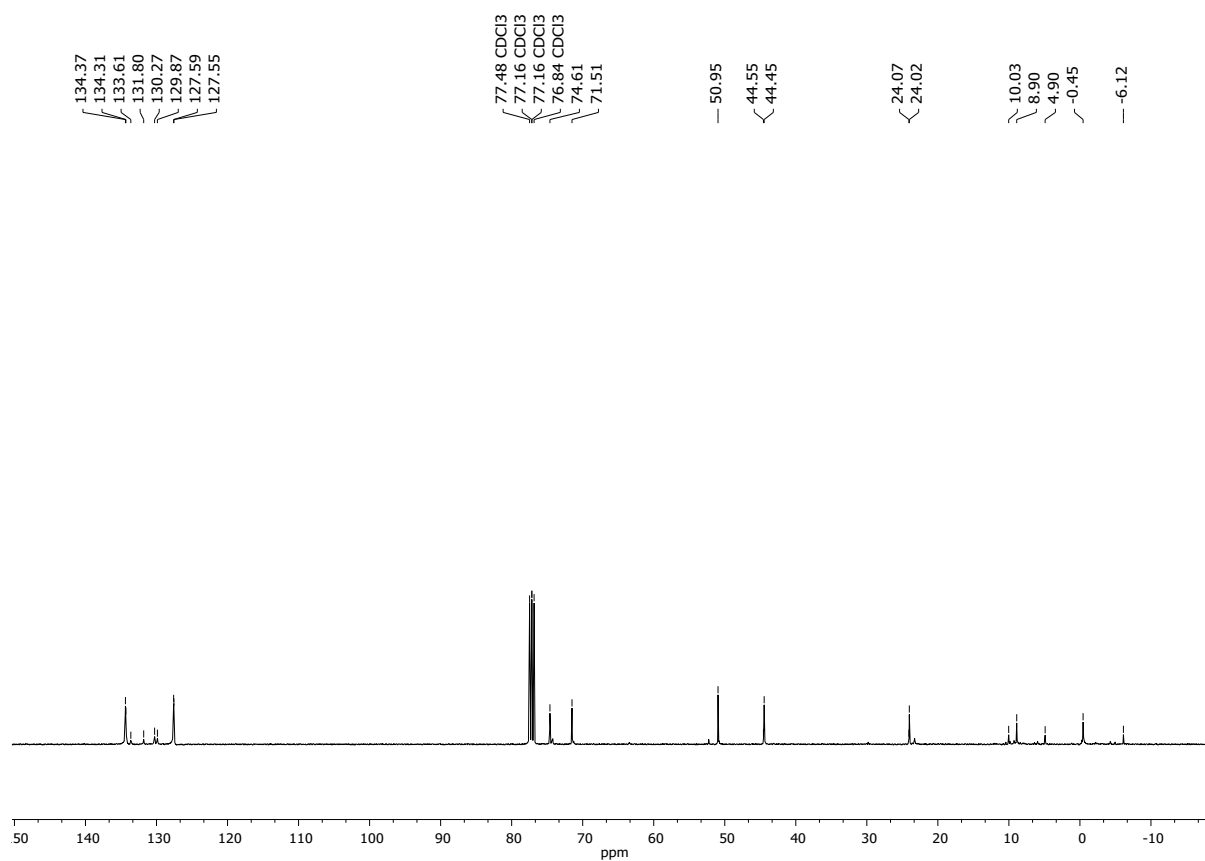

Figure S33 <sup>13</sup>C NMR (101 MHz, CDCl<sub>3</sub>) spectrum of **G1-8D-8epoxy**.

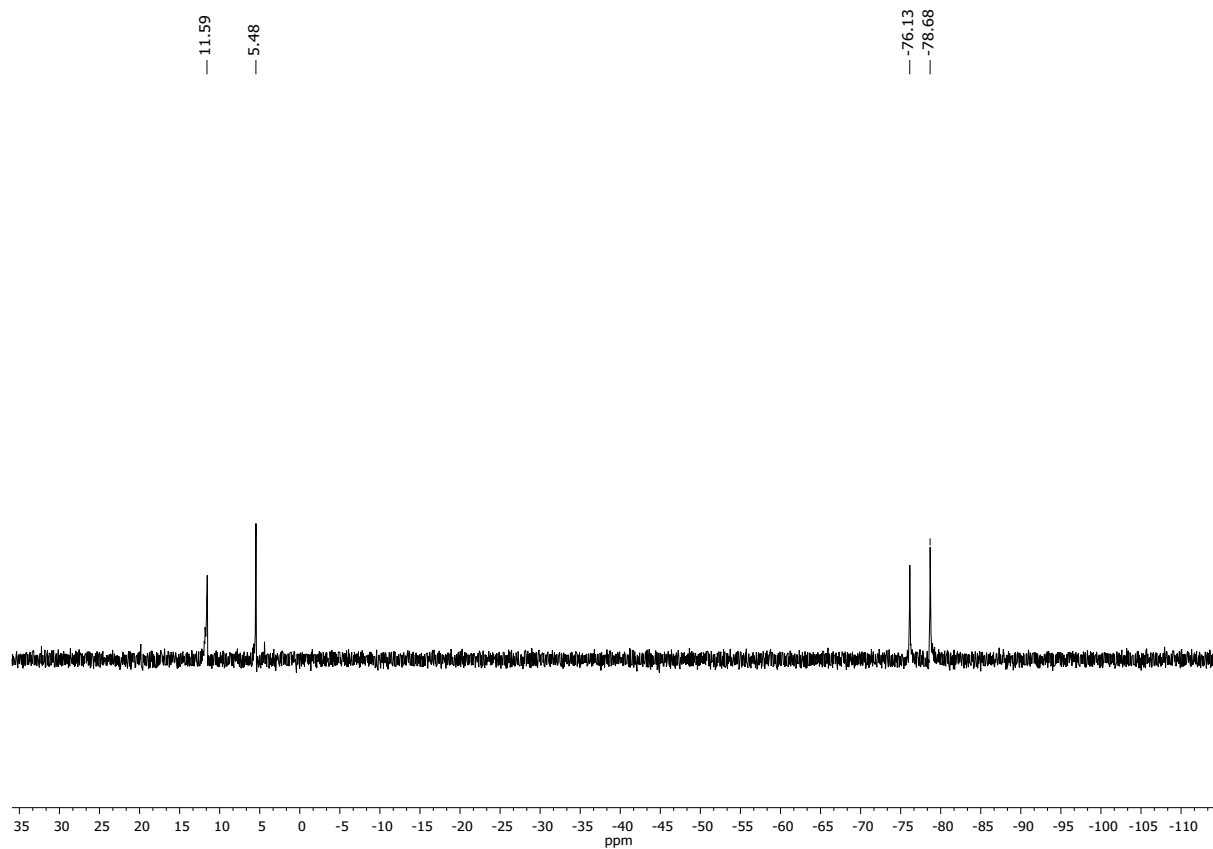

Figure S34 <sup>29</sup>Si NMR (79.50 MHz, CDCl<sub>3</sub>) spectrum of **G1-8D-8epoxy**.

### G1-8T-16H

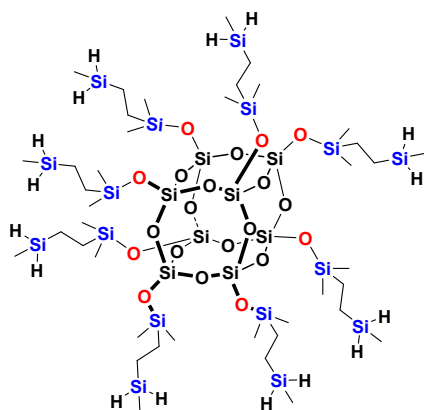

Viscous oils. Isolated Yield 85%

<sup>1</sup>H NMR (300 MHz, CDCl<sub>3</sub>, ppm): δ = 0.14 (s, 72H, -CH<sub>3</sub>), 0.58 (m, 32H, Si-CH<sub>2</sub>-), 3.73 (m, 16H, -Si-H).

<sup>13</sup>C NMR (101 MHz, CDCl<sub>3</sub>, ppm): δ = -8.55 (H<sub>2</sub>Si-CH<sub>3</sub>), -0.74 (Si-CH<sub>3</sub>), 2.25 (Si-CH<sub>2</sub>-), 11.63 (CH<sub>2</sub>-Si).

<sup>29</sup>Si NMR (79.50 MHz, CDCl<sub>3</sub>, ppm): δ = 12.75 (-Si-CH<sub>3</sub>), -29.14 (H<sub>2</sub>Si-CH<sub>2</sub>), -108.92 (-SiO<sub>4</sub>, cage).

IR (ATR, cm<sup>-1</sup>): 2959.91, 2913.95 (C-H), 2124.87 (Si-H), 1251.80 (Si-C), 1137.51, 1072.97, 1053.98 (Si-O-Si), 944.71 (Si-H).

EA: Anal. calcd for C<sub>116</sub>H<sub>180</sub>O<sub>30</sub>Si<sub>16</sub> (%): C, 30.11, H, 7.58; found: C, 30.23; H, 7.61.

GPC: M<sub>w</sub> = 1920; M<sub>n</sub> = 1817; D = 1.057.

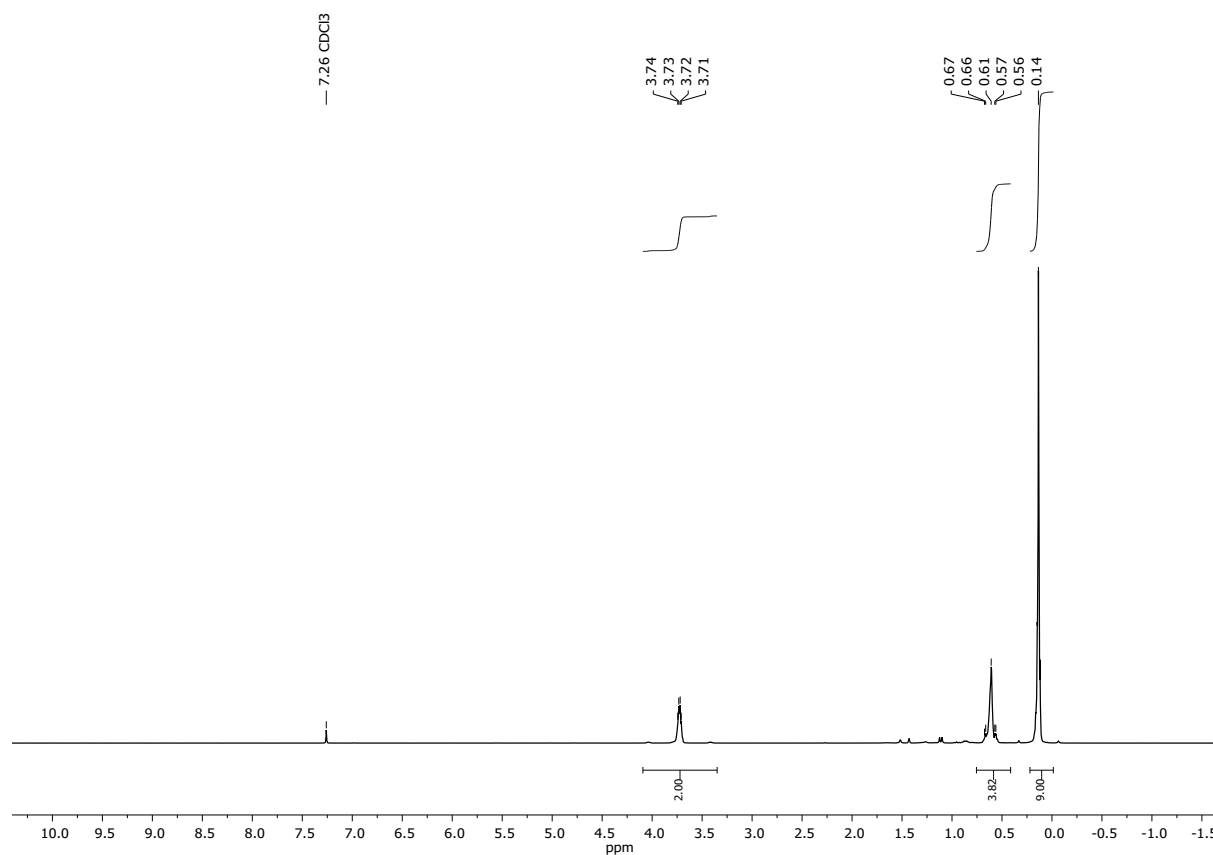

Figure S35 <sup>1</sup>H NMR (300 MHz, CDCl<sub>3</sub>) spectrum of G1-8T-16H.

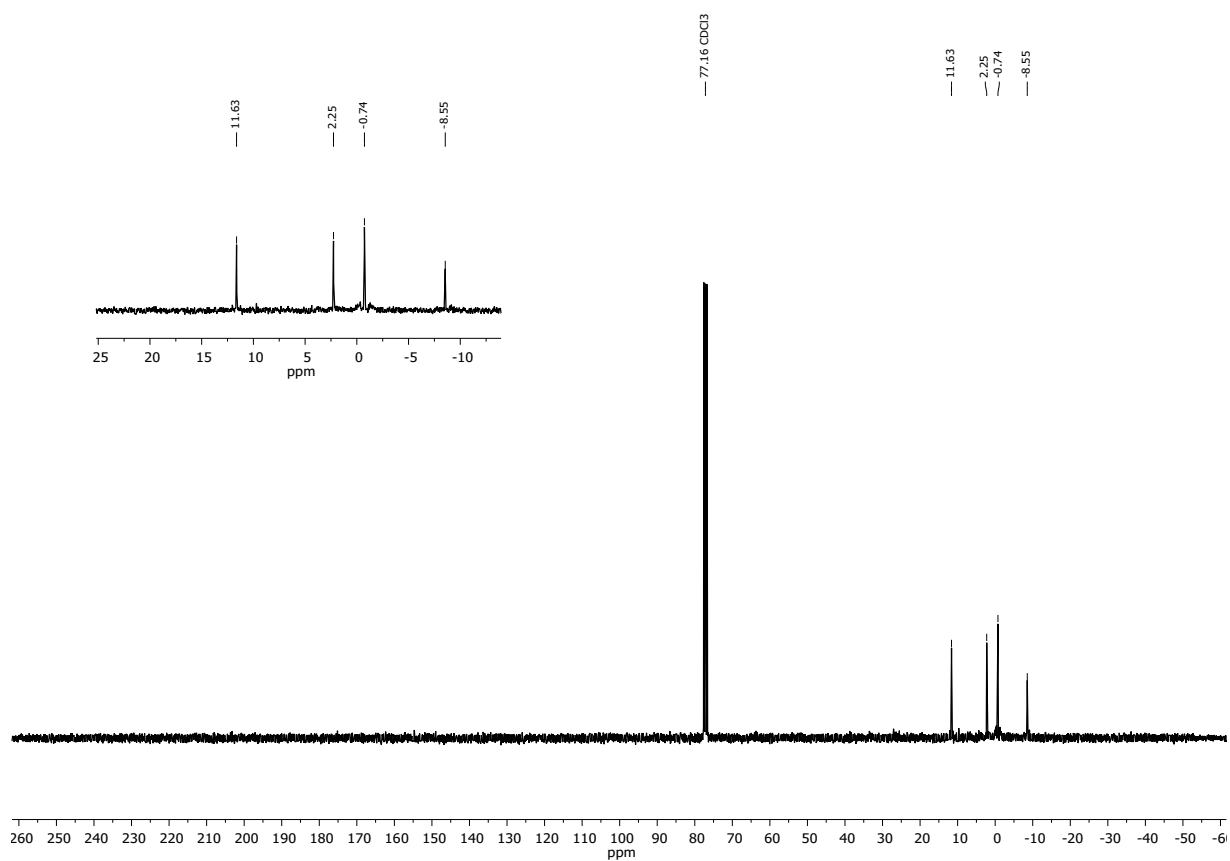

Figure S36  $^{13}\text{C}$  NMR (75.50 MHz,  $\text{CDCl}_3$ ) spectrum of G1-8T-16H.

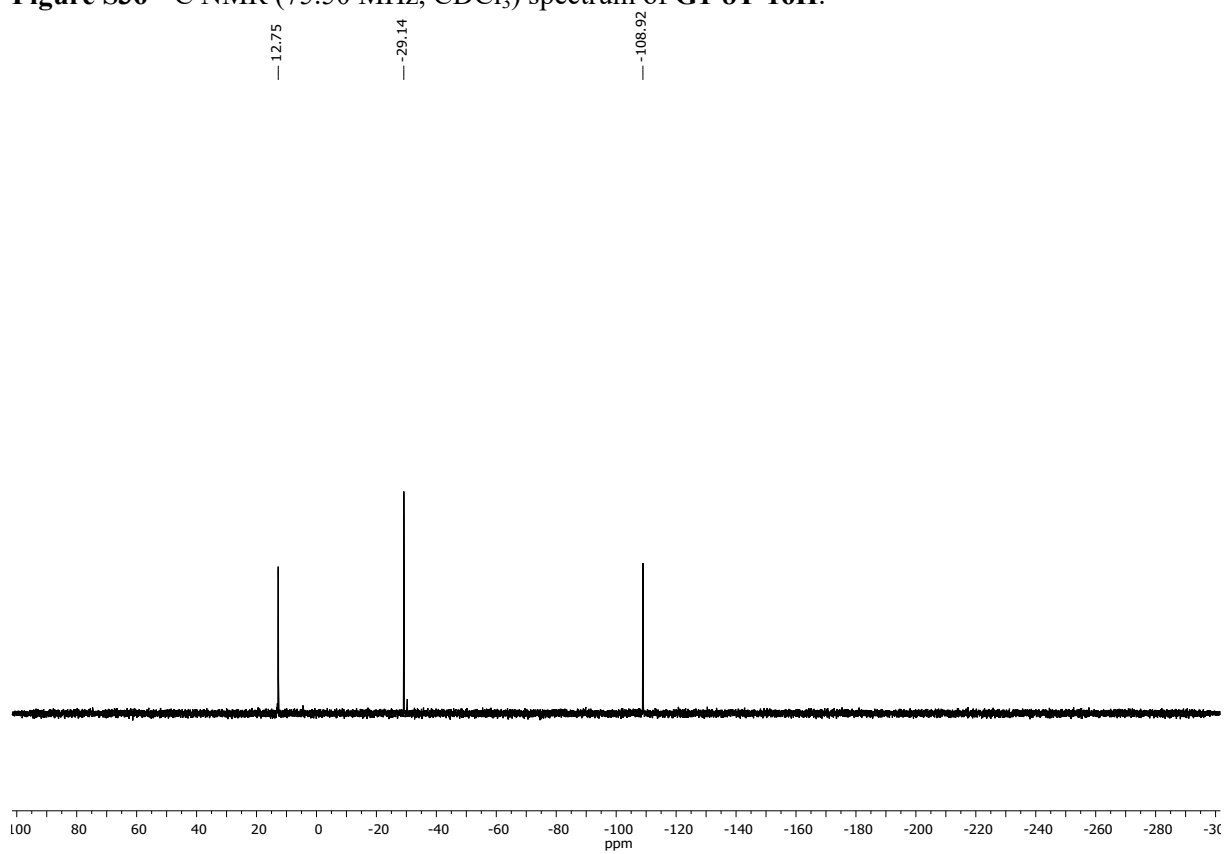

Figure S37  $^{29}\text{Si}$  NMR (79.50 MHz,  $\text{CDCl}_3$ ) spectrum of G1-8T-16H.

### G1-8T-24H

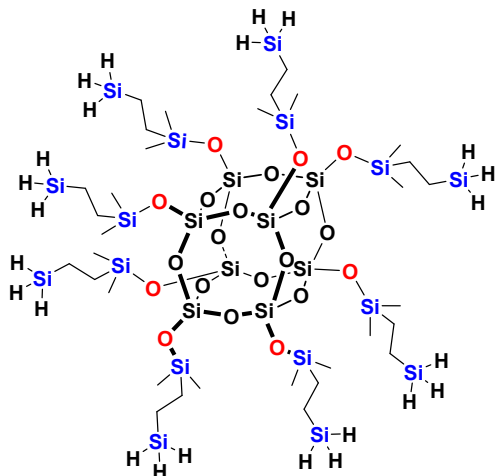

Viscous oils. Isolated Yield 85%

<sup>1</sup>H NMR (300 MHz, CDCl<sub>3</sub>, ppm): δ = 0.14 (s, 48H, -CH<sub>3</sub>), 0.68 (m, 32H, Si-CH<sub>2</sub>-), 3.55 (t, *J*<sub>H-H</sub> = 3.6 Hz, 24H, -Si-H).

<sup>13</sup>C NMR (101 MHz, CDCl<sub>3</sub>, ppm): δ = -1.85 (H<sub>3</sub>Si-CH<sub>2</sub>), -0.69 (Si-CH<sub>3</sub>), 13.41 (Si-CH<sub>2</sub>-).

<sup>29</sup>Si NMR (79.50 MHz, CDCl<sub>3</sub>, ppm): δ = 12.52 (-Si-CH<sub>2</sub>), -53.75 (H<sub>3</sub>Si-CH<sub>2</sub>), -108.99 (-SiO<sub>4</sub>, cage).

IR (ATR, cm<sup>-1</sup>): 2958.98, 2920.74, 2894.91 (C-H), 2143.97 (Si-H), 1253.39 (Si-C), 1139.52, 1072.63, 1055.82 (Si-O-Si), 922.13 (Si-H).

EA: Anal. calcd for C<sub>116</sub>H<sub>180</sub>O<sub>30</sub>Si<sub>16</sub> (%): C, 25.91, H, 7.07; found: C, 26.01; H, 7.07.

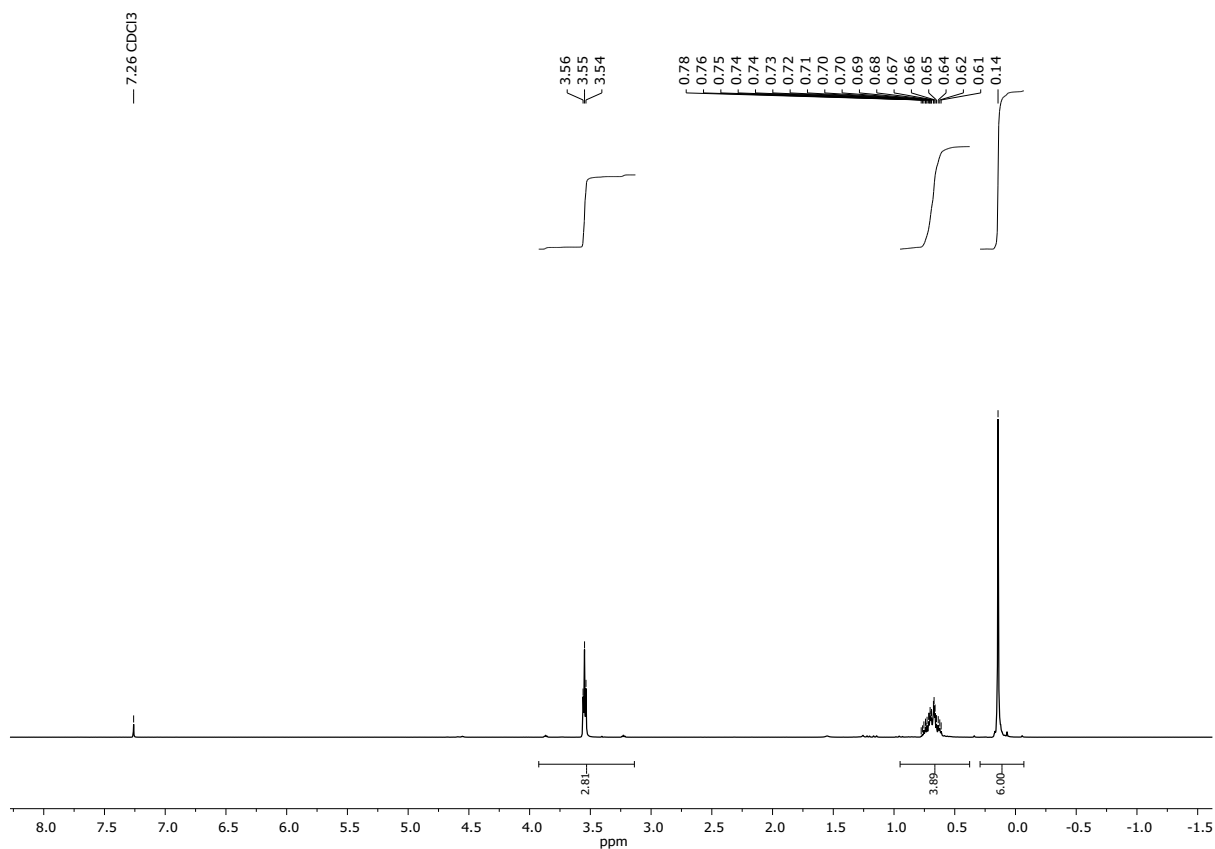

Figure S38 <sup>1</sup>H NMR (300 MHz, CDCl<sub>3</sub>) spectrum of G1-8T-24H.



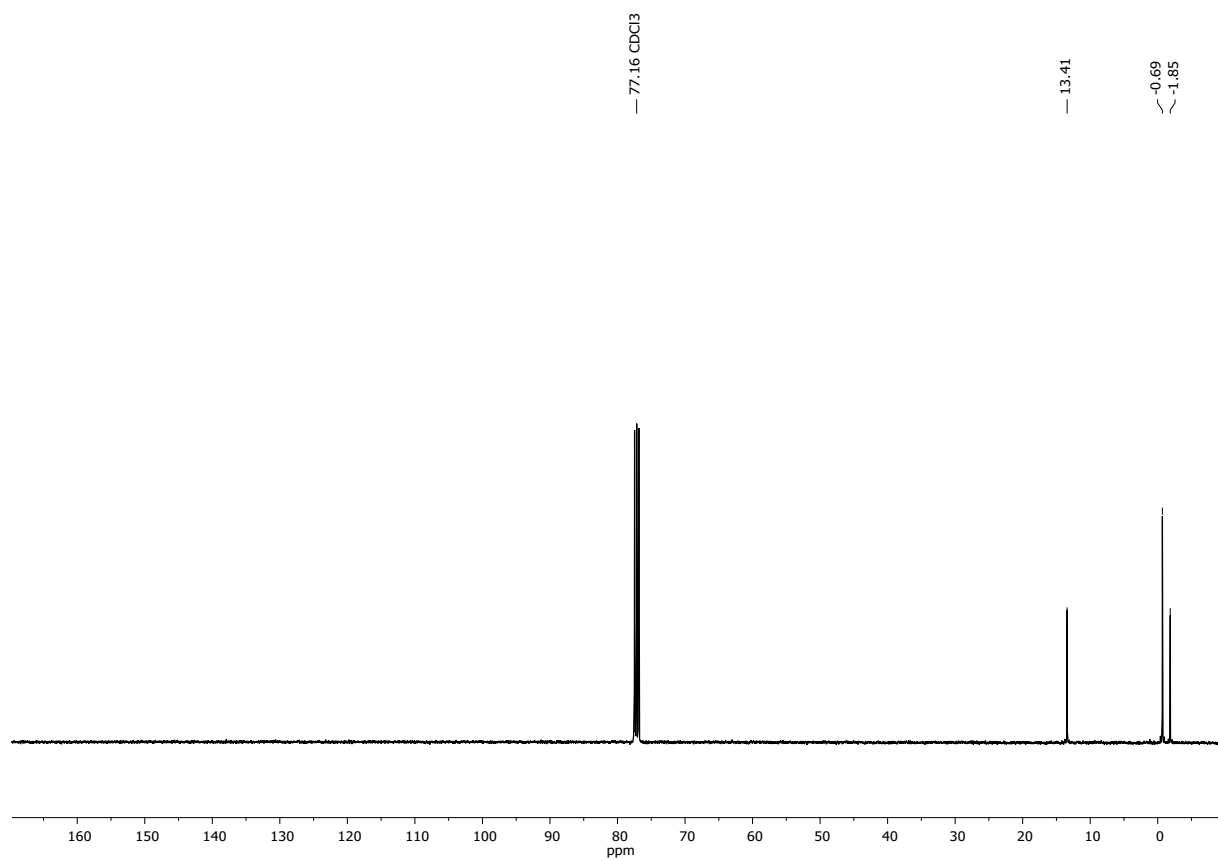

**Figure S39**  $^{13}\text{C}$  NMR (101 MHz,  $\text{CDCl}_3$ ) spectrum of **G1-8T-24H**.

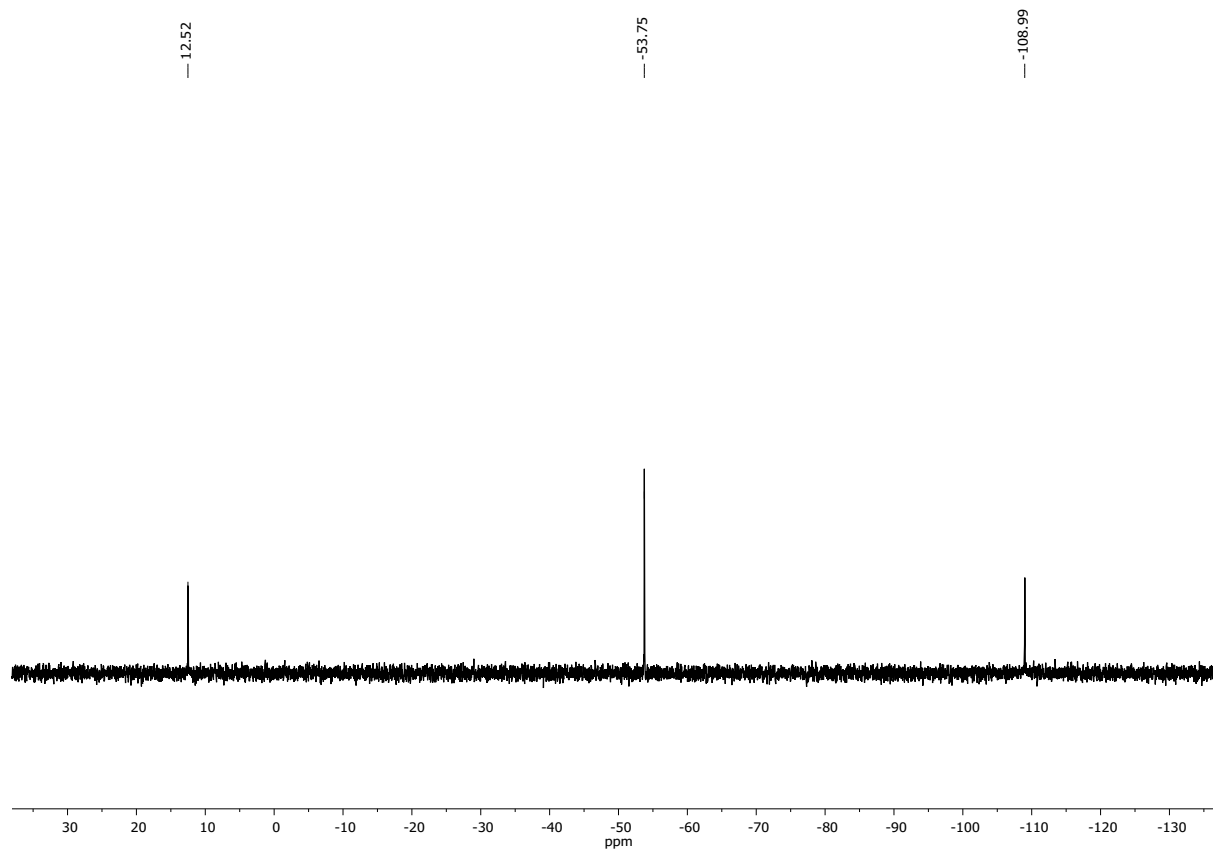

**Figure S40**  $^{29}\text{Si}$  NMR (79.50 MHz,  $\text{CDCl}_3$ ) spectrum of **G1-8T-24H**.

## G2-16T-32H

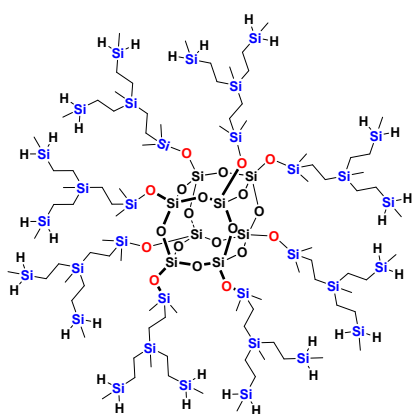

Viscous oils. Isolated Yield 77% for mixture of hydrosilylation besides products.

<sup>1</sup>H NMR (300 MHz, CDCl<sub>3</sub>, ppm):  $\delta$  = 0.13-0.06 (SiCH<sub>3</sub>), 1.26-0.43 (SiCH<sub>2</sub>CH<sub>2</sub>Si, SiCH(CH<sub>3</sub>)Si), 3.74 (m, SiH<sub>2</sub>).

<sup>13</sup>C NMR (101 MHz, CDCl<sub>3</sub>, ppm):  $\delta$  = -8.52, -8.42, -8.37, -7.37, -7.17, -7.10, -6.84, -6.81, -6.77, -6.66, -6.33, -6.23, -6.15, -1.63, -1.26, -0.88, -0.82, -0.75, -0.29, 0.13, 0.18, 0.89, 3.24, 3.60, 3.68, 3.81, 3.88, 4.05, 4.14, 4.16, 4.23, 4.31, 5.50, 5.59, 6.52, 6.57, 6.62, 6.85, 7.00, 9.51, 9.68, 9.89, 10.03, 10.54, 10.56, 10.59, 10.74, 10.81, 11.28.

<sup>29</sup>Si NMR (79.50 MHz, CDCl<sub>3</sub>, ppm):  $\delta$  = 12.84 (SiCH<sub>3</sub>)<sub>2</sub>, 7.88 (Si-O-Si), -2.49, -3.26, -3.53, -3.67, -3.88, -4.19, -4.39, -4.42, -4.83 (SiCH<sub>2</sub>, SiCH(CH<sub>3</sub>), SiCH<sub>3</sub>), -29.24, -29.68 (RSiH<sub>2</sub>), -108.84 (SiO<sub>4</sub> cage).

IR (ATR, cm<sup>-1</sup>): 2957.31, 2907.82, 2882.15 (C-H), 2123.32 (Si-H), 1250.59 (Si-C), 1174.87, 1135.11, 1078.02, 1053.84 (Si-O-Si), 944.71 (Si-H).

GPC: M<sub>w</sub> = 2801; M<sub>n</sub> = 2678; *D* = 1.046.

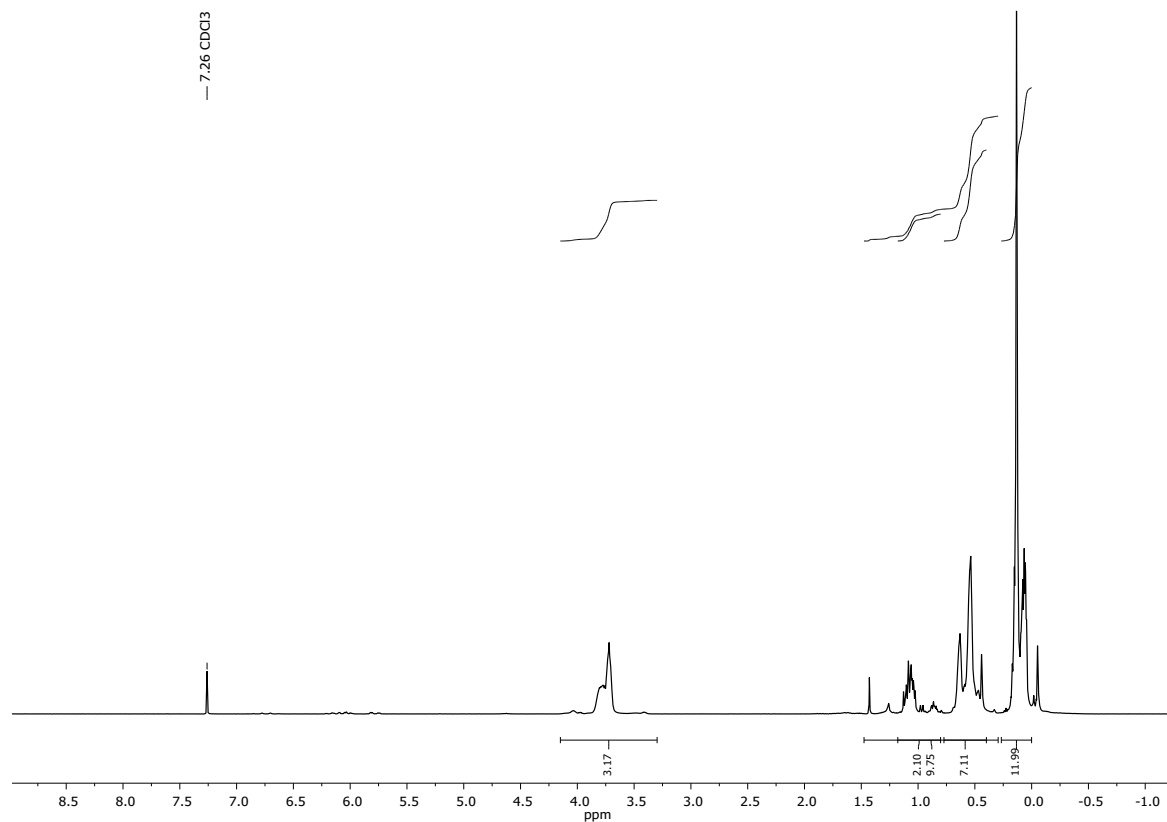

Figure S41 <sup>1</sup>H NMR (300 MHz, CDCl<sub>3</sub>) spectrum of G2-16T-32H.

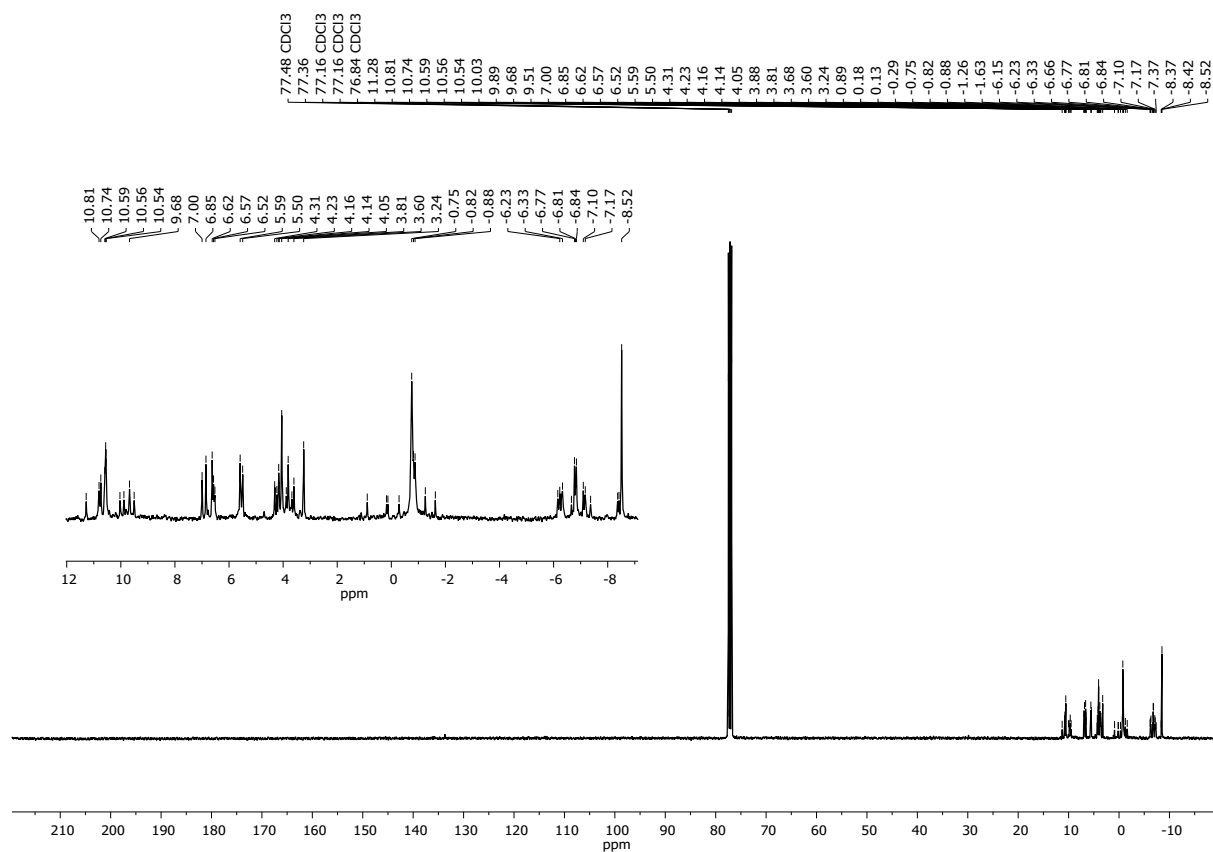

Figure S 42 <sup>13</sup>C NMR (101 MHz, CDCl<sub>3</sub>) spectrum of G2-16T-32H.

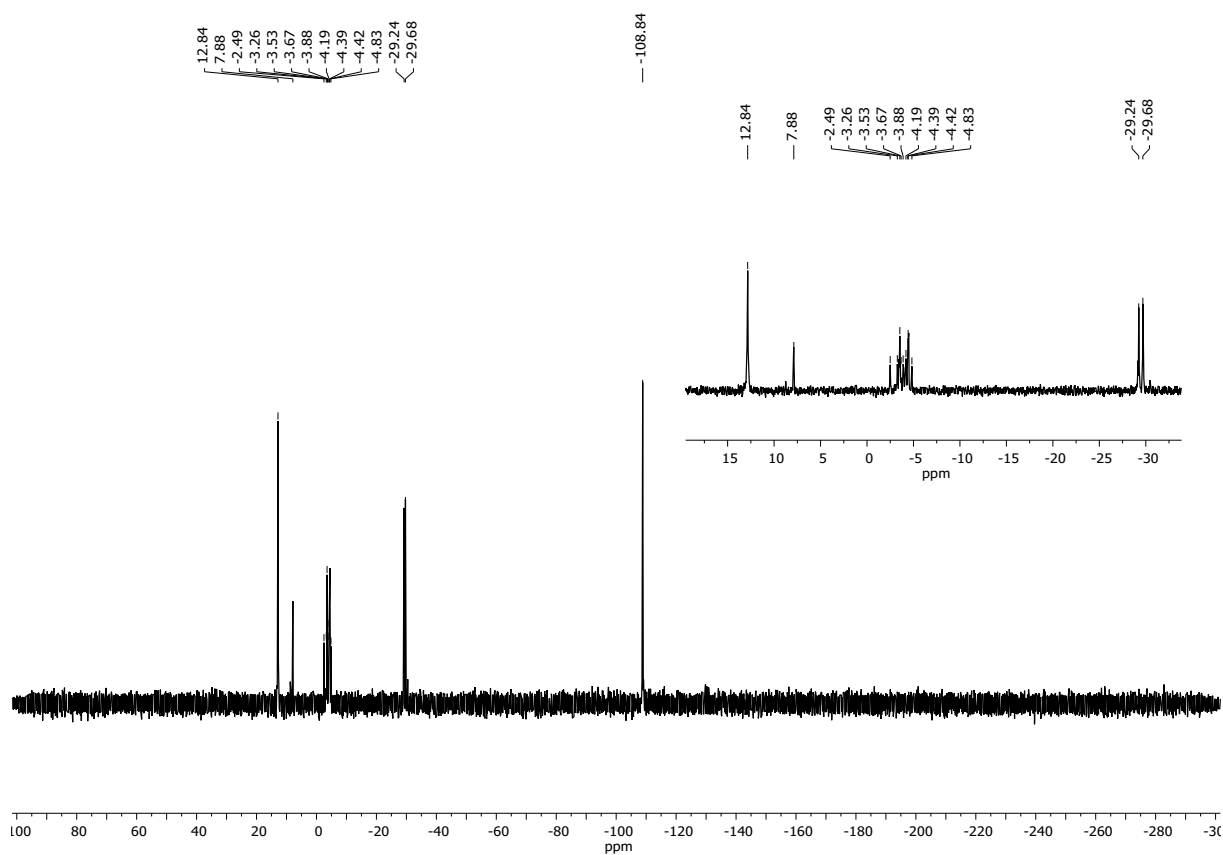

Figure S43 <sup>29</sup>Si NMR (79.50 MHz, CDCl<sub>3</sub>) spectrum of G2-16T-32H.

## G1-16T-16octyl

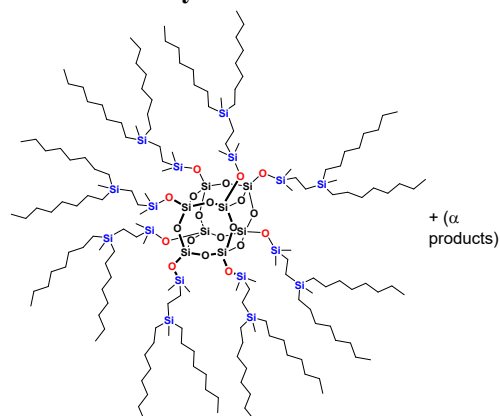

Viscous oils. Isolated Yield 91% for mixture of hydrosilylation besides products (13% of the  $\alpha$ -isomer - based on methyl integration at the SiCH<sub>3</sub> group)

<sup>1</sup>H NMR (300 MHz, CDCl<sub>3</sub>, ppm):  $\delta$  = -0.08 (s, -SiCH<sub>3</sub>,  $\beta$  isomer), -0.05 (s, -SiCH<sub>3</sub>,  $\alpha$  isomer), 0.13 (s, Si(CH<sub>3</sub>)<sub>2</sub>), 0.36-0.50 (m, Si-CH<sub>2</sub>-), 0.88 (t, -CH<sub>3</sub>), 1.27 (s, CH<sub>20</sub>octyl).

<sup>13</sup>C NMR (101 MHz, CDCl<sub>3</sub>, ppm):  $\delta$  = -3.71, 6.47 ( $\alpha$  isomer), -5.47 (Si-CH<sub>3</sub>), -0.09 (Si-CH<sub>3</sub>), 5.01 (Si-CH<sub>2</sub>-), 9.76 (Si-CH<sub>2</sub>-), 13.49, 14.28, 22.88, 24.09, 29.51, 32.15, 34.05 (CH<sub>2</sub>).

<sup>29</sup>Si NMR (79.50 MHz, CDCl<sub>3</sub>, ppm):  $\delta$  = 12.95 (-Si(CH<sub>3</sub>)<sub>2</sub>), 4.75 (SiCH<sub>3</sub>,  $\beta$  isomer), 4.15 (SiCH<sub>3</sub>,  $\alpha$  isomer), -108.72 (SiO<sub>4</sub> cage).

IR (ATR, cm<sup>-1</sup>): 2955.68, 2919.98, 2872.36, 2852.40 (C-H), 1250.69 (Si-C), 1134.43, 1077.66, 1051.30 (Si-O-Si).

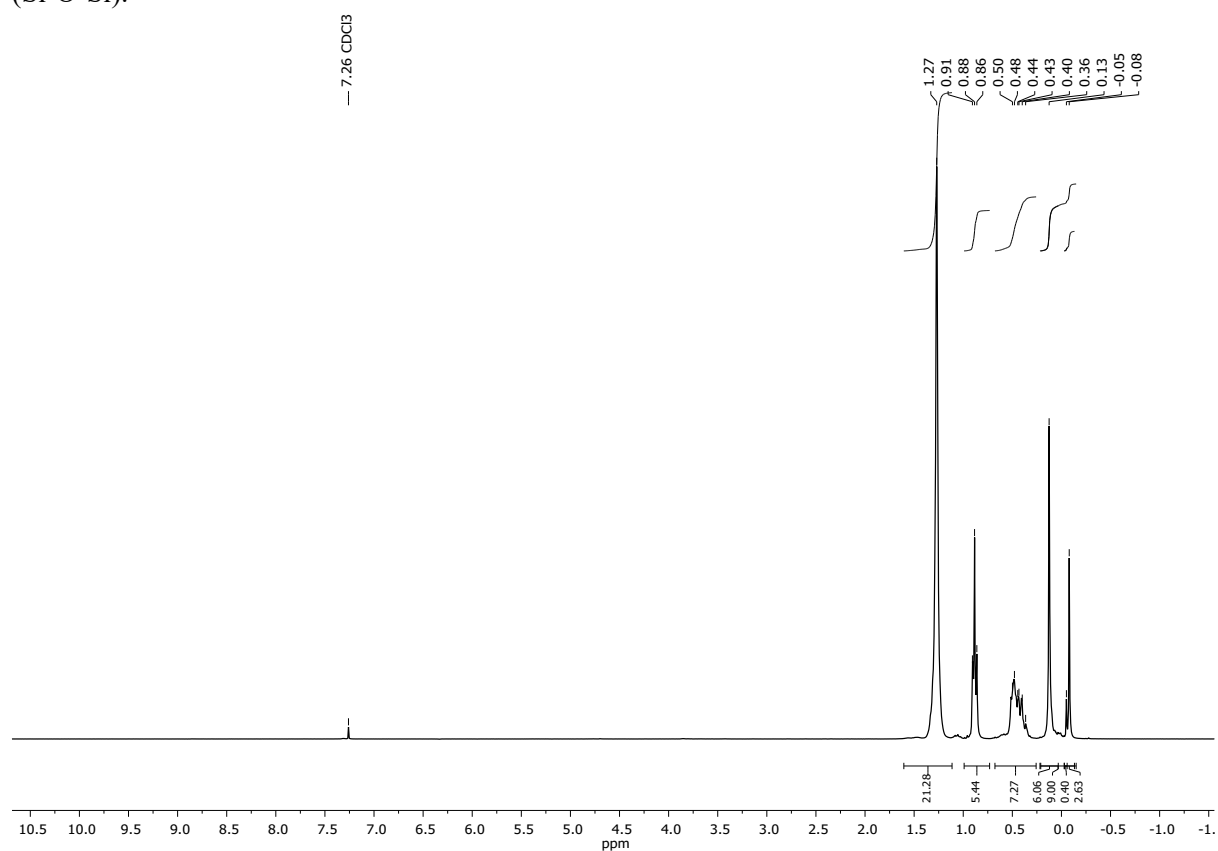

Figure S44 <sup>1</sup>H NMR (300 MHz, CDCl<sub>3</sub>) spectrum of G1-16T-16octyl.

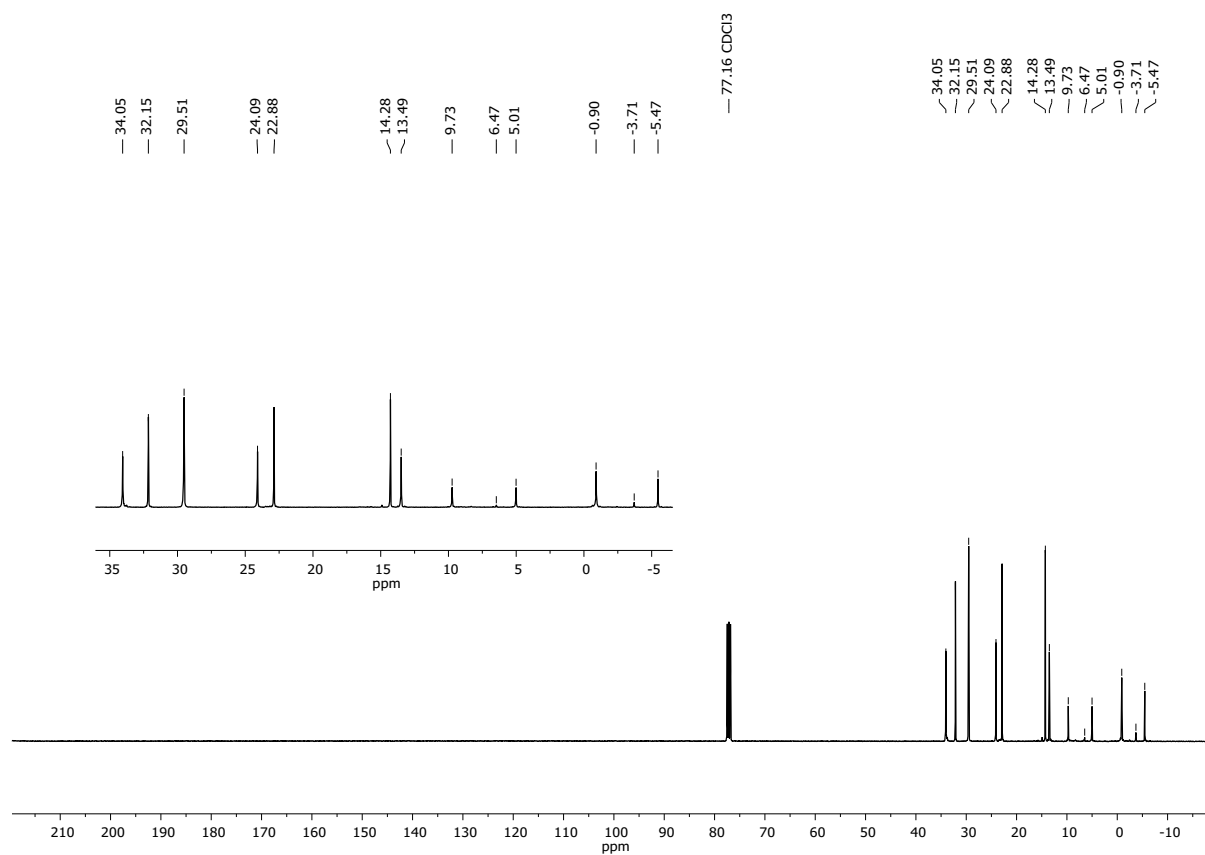

**Figure S45** <sup>13</sup>C NMR (101 MHz, CDCl<sub>3</sub>) spectrum of **G1-16T-16octyl**.

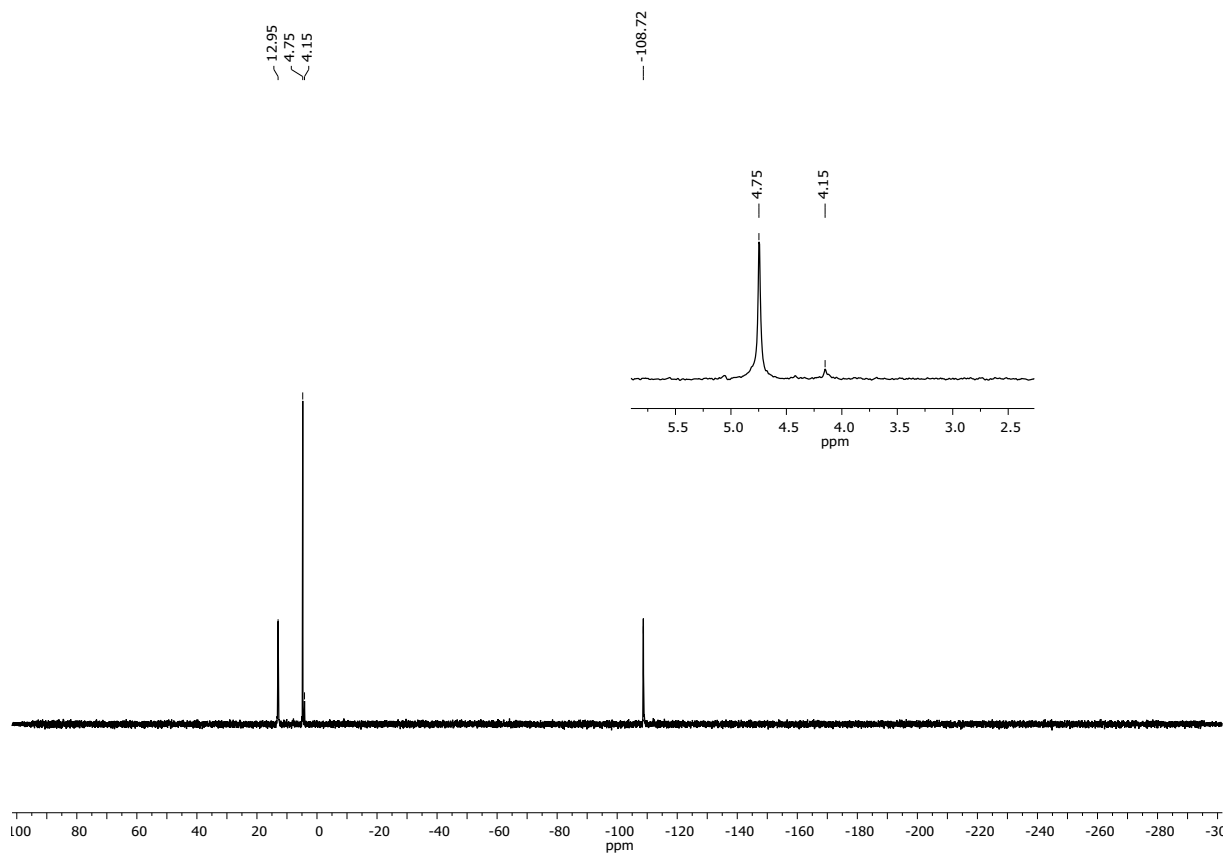

**Figure S46**  $^{29}\text{Si}$  NMR (79.50 MHz,  $\text{CDCl}_3$ ) spectrum of G1-16T-16octyl.

## G1-16T-16epoxy

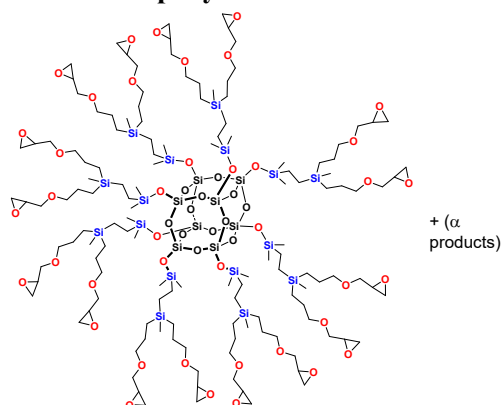

Viscous oils. Isolated Yield 88% for mixture of hydrosilylation besides products.

$^1\text{H NMR}$  (300 MHz,  $\text{CDCl}_3$ , ppm):  $\delta = -0.06$  (s,  $-\text{SiCH}_3$ ), 0.10 (s,  $-\text{Si}(\text{CH}_3)_2$ ), 0.38-0.55 (m,  $\text{SiCH}_2$ ), 1.44-1.63 (m,  $\text{Si-CH}_2-$ ), 2.58 (m,  $\text{CH}_{\text{oxirane}}$ ), 2.77 (m,  $\text{CH}_{\text{oxirane}}$ ), 3.06-3.18 (m,  $\text{CH}_{\text{oxirane}}$ ), 3.30-3.51 (m,  $\text{CH}_2\text{-O}$ ), 3.68 (dd,  $J_{\text{H-H}} = 11.5, 3.0$  Hz,  $\text{O-CH}_2$ ).

$^{13}\text{C NMR}$  (75.50 MHz,  $\text{CDCl}_3$ , ppm):  $\delta = -5.73, -0.96, 4.77, 9.09, 9.15, 9.55, 23.54, 24.14, 44.36, 50.87, 50.93, 71.53, 74.58$ .

$^{29}\text{Si NMR}$  (79.50 MHz,  $\text{CDCl}_3$ , ppm):  $\delta = 13.06$  ( $-\text{Si}(\text{CH}_3)_2$ ), 5.87 ( $\text{SiCH}_3\text{CH}_2$ ,  $\beta$  isomer), 4.77 ( $\text{SiCH}_3\text{CH}$ ,  $\alpha$  isomer),  $-108.81$  ( $\text{SiO}_4$  cage).

**IR** (ATR,  $\text{cm}^{-1}$ ): 2996.17, 2953.34, 2953.14, 2870.45 (C-H), 1251.01 (Si-C), 1134.17, 1074.61, 1049.68 (Si-O-Si).

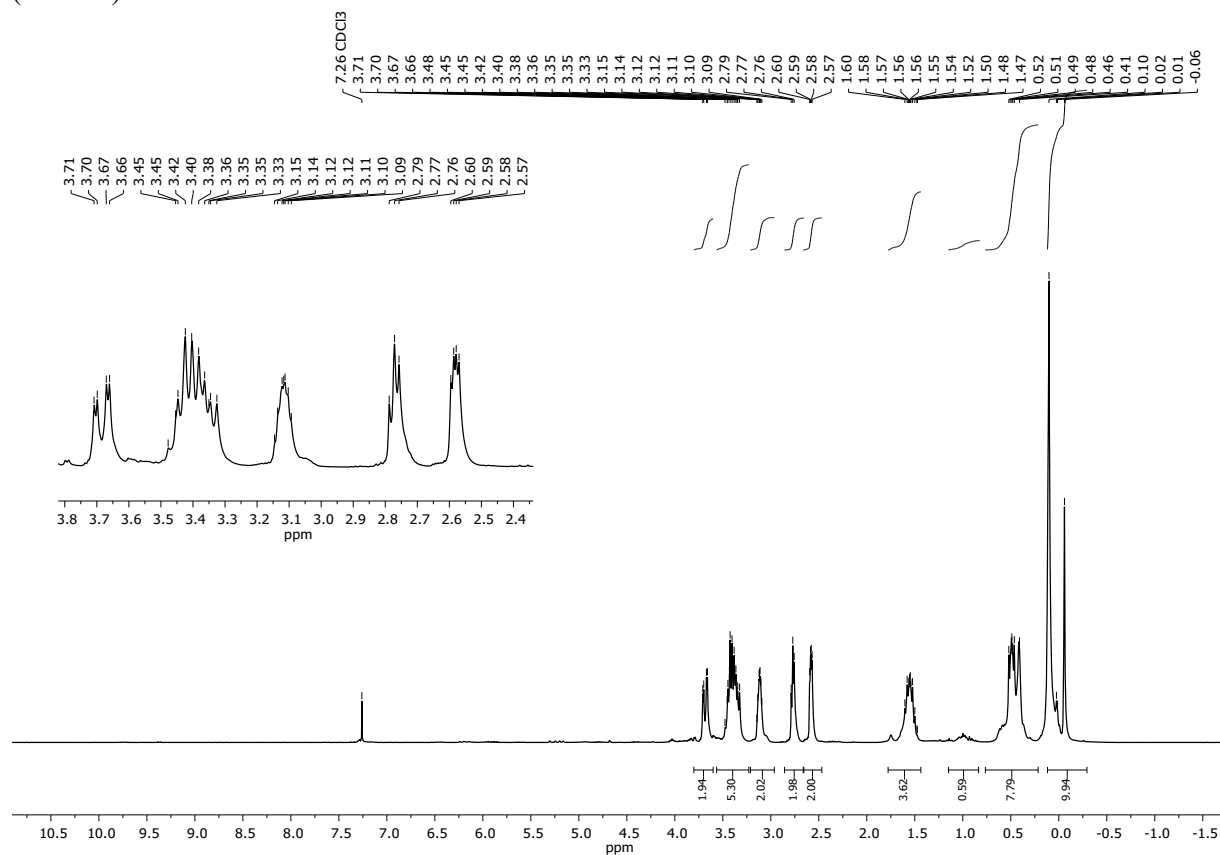

**Figure S47**  $^1\text{H NMR}$  (300 MHz,  $\text{CDCl}_3$ ) spectrum of **G1-16T-16epoxy**.



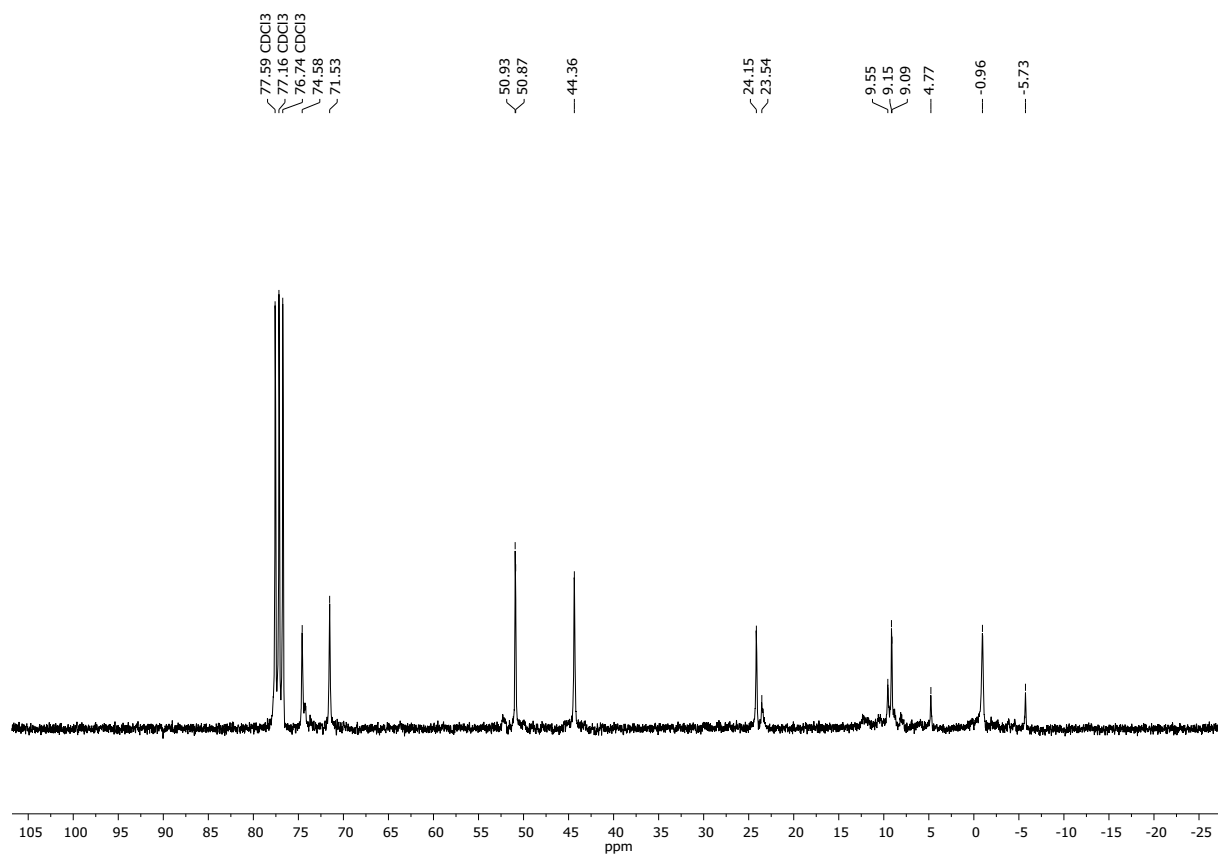

Figure S48 <sup>13</sup>C NMR (75.50 MHz, CDCl<sub>3</sub>) spectrum of G1-16T-16epoxy.

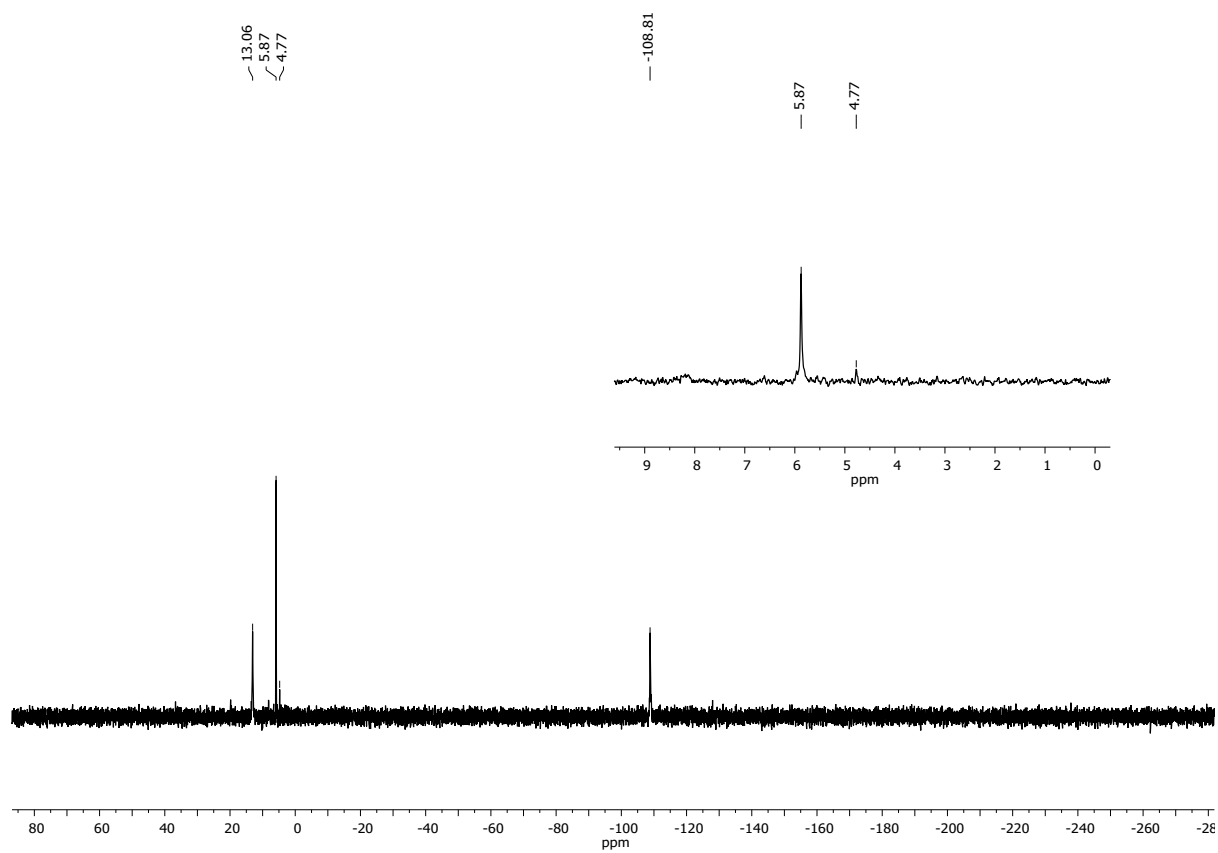

Figure S49 <sup>29</sup>Si NMR (79.50 MHz, CDCl<sub>3</sub>) spectrum of G1-16T-16epoxy.

## 6. Additional information and NMR spectra

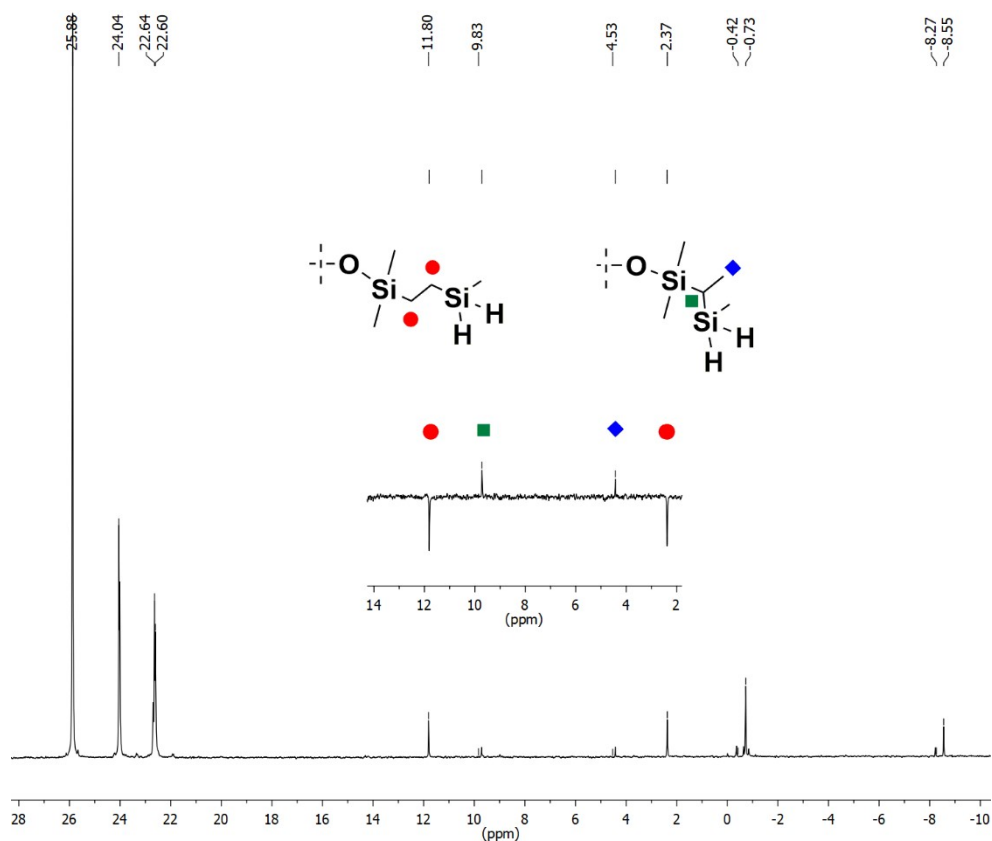

**Figure S50**  $^{13}\text{C}$  NMR (75.50 MHz,  $\text{CDCl}_3$ ) spectrum of mixture of two products: **G1-1iBuOSi-2H- $\beta$**  and **G1-1iBuOSi-2H- $\alpha$** . Inset: DEPT-135 (101 MHz,  $\text{CDCl}_3$ ) spectrum.

### Procedure for the one-pot synthesis of dendritic systems with octa- $\text{T}_8$ silsesquioxane core through hydrosilylation followed by reduction reaction with using octakis(dimethylsiloxy)silsesquioxane and trichlorovinylsilane

The reaction was carried out in an oven-dried Schlenk-type reactor under argon atmosphere. To a mixture prepared from 1g (0.982 mmol) of octakis(dimethylsiloxy)silsesquioxane and 10 mL of anhydrous toluene, 1.15 mL (9.04 mmol) of trichlorovinylsilane was added at room temperature. To the prepared mixture of reagents Karstedt's complex was added (9  $\mu\text{L}$ ,  $10^{-4}$  mol Pt/ mol SiH), reaction vessel was closed and heated at  $95^\circ\text{C}$  with stirring. The reaction was monitored with FT-IR spectroscopy, by following the band originating from SiH units ( $2141\text{ cm}^{-1}$ ). After the complete conversion of hydrosilyl units, the reaction was cooled down, then the toluene and an excess of chlorosilane were evaporated under reduced pressure. Obtained oil was dissolved in 20 mL of anhydrous toluene, and then 5.3 mL of Red-Al<sup>®</sup> sodium bis(2-methoxyethoxy)aluminum hydride solution was added dropwise and the reaction was stirred overnight at room temperature. The resulting mixture was added to 2-propanol and stirred for 30 minutes. After that, the solvents and volatile liquids were evaporated under reduced pressure. The product was extracted from the resulting mixture with *n*-hexane and then filtered through a celite/silica gel column. Evaporation of *n*-hexane led to the formation of transparent oil. Yield 84%. NMR analysis revealed the existence of two isomers:  $\beta : \alpha = 64 : 36$  – on the basis on  $^1\text{H}$  NMR integrals.

$^1\text{H}$  NMR (300 MHz,  $\text{CDCl}_3$ , ppm):  $\delta = 0.14, 0.17$  ( $-\text{SiCH}_3$ ), 0.69 (m,  $\beta$  isomer  $\text{SiCH}_2\text{CH}_2\text{Si}$  and  $\alpha$  isomer  $\text{SiCH}(\text{CH}_3)\text{Si}$ ), 1.15 (d,  $J_{\text{H-H}} = 7.5\text{ Hz}$ , 1H,  $\alpha$  isomer  $\text{SiCH}(\text{CH}_3)\text{Si}$ ), 3.55 (m,  $\text{SiH}_3$ ).

$^{13}\text{C}$  NMR (101 MHz,  $\text{CDCl}_3$ , ppm):  $\delta = -1.85$  ( $\text{SiCH}_2\text{CH}_2\text{SiH}_3$ ),  $-1.25$  ( $\text{SiCH}(\text{CH}_3)\text{SiH}_3$ ),  $-0.71$  ( $\text{SiCH}_3$ ),  $0.58$  ( $\text{SiCH}_3$ ),  $11.05$  ( $\text{SiCH}(\text{CH}_3)\text{Si}$ ),  $13.42$  ( $\text{SiCH}_2$ ).

$^{29}\text{Si}$  NMR (79.50 MHz,  $\text{CDCl}_3$ , ppm):  $\delta = 12.99$ - $12.42$  ( $\text{OSiCH}_2$ ,  $\text{OSiCH}(\text{CH}_3)$ ),  $-53.74$  ( $\text{CH}_2\text{CH}_2\text{SiH}_3$ ),  $-54.64$  ( $\text{OSiCH}(\text{CH}_3)\text{SiH}_3$ ),  $-108.96$ - $109.25$  ( $\text{SiO}_4$  cage).

IR (ATR,  $\text{cm}^{-1}$ ): 2961.33, 2893.98 (C-H), 1256.70 (Si-C), 1144.13, 1077.20, 1057.72 1004.77 (Si-O-Si).

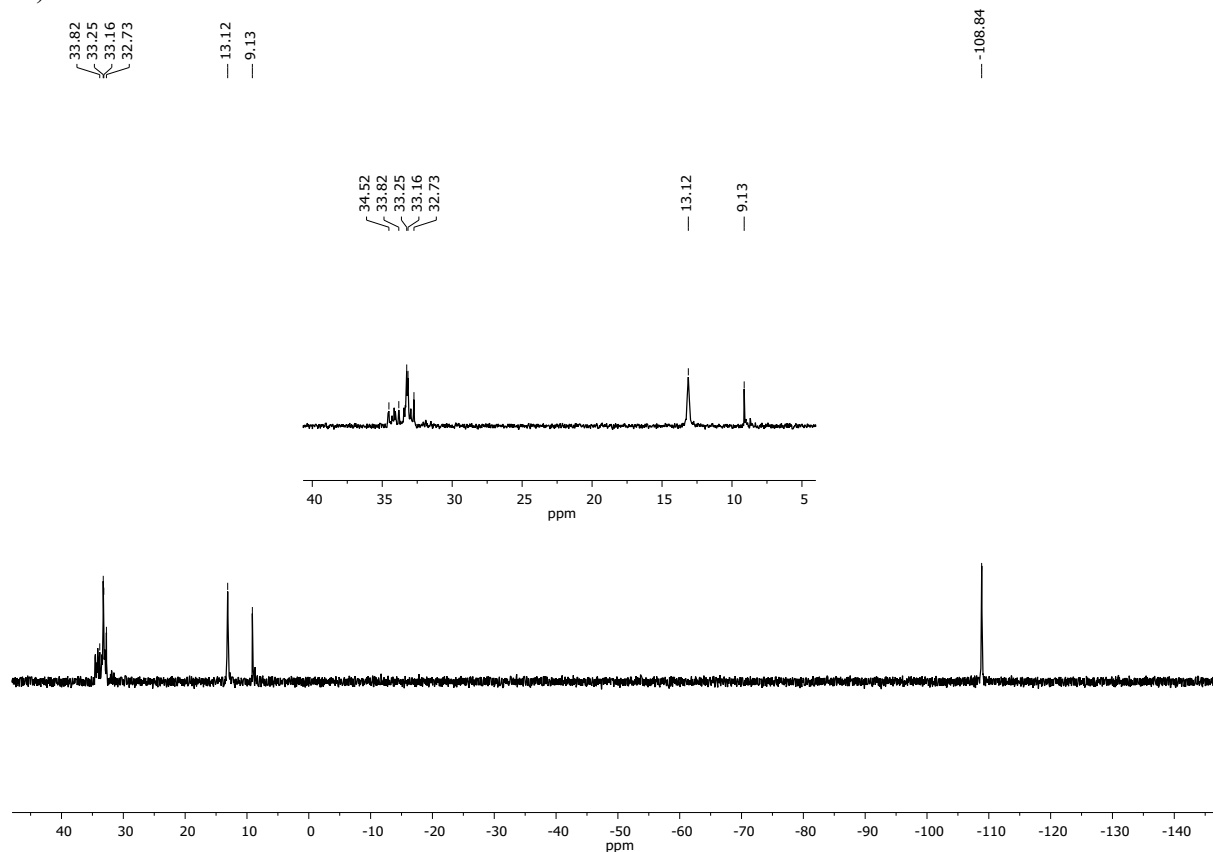

**Figure S51**  $^{29}\text{Si}$  NMR (79.50 MHz,  $\text{CDCl}_3$ ) spectrum of mixture of chlorinated products (**G1-8T-24Cl-mix**) obtained by the reaction of octakis(dimethylsiloxy)silsesquioxane with trichlorovinylsilane *via* hydrosilylation reaction.

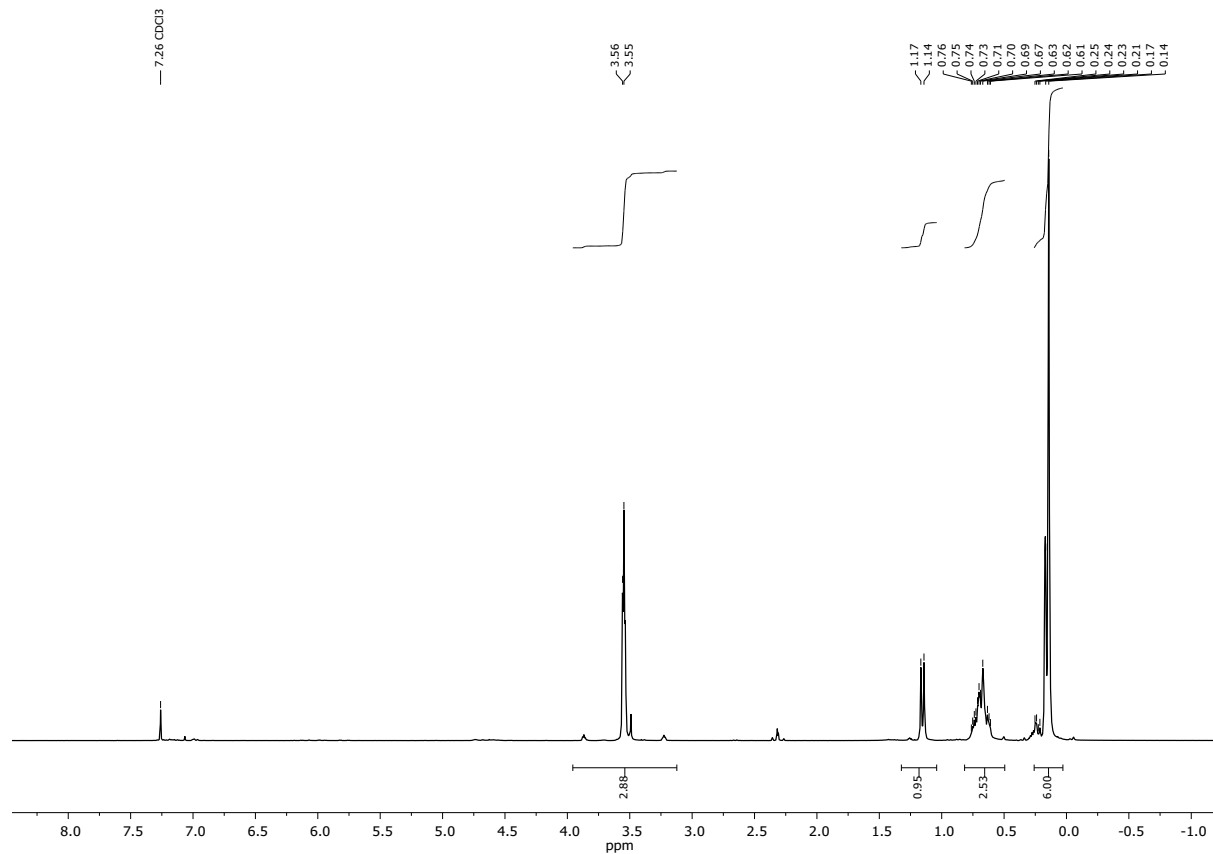

**Figure S52** <sup>1</sup>H NMR (300 MHz, CDCl<sub>3</sub>) spectrum of mixture of hydrogen derivative products (**G1-8T-24H-mix**) obtained by the reduction.

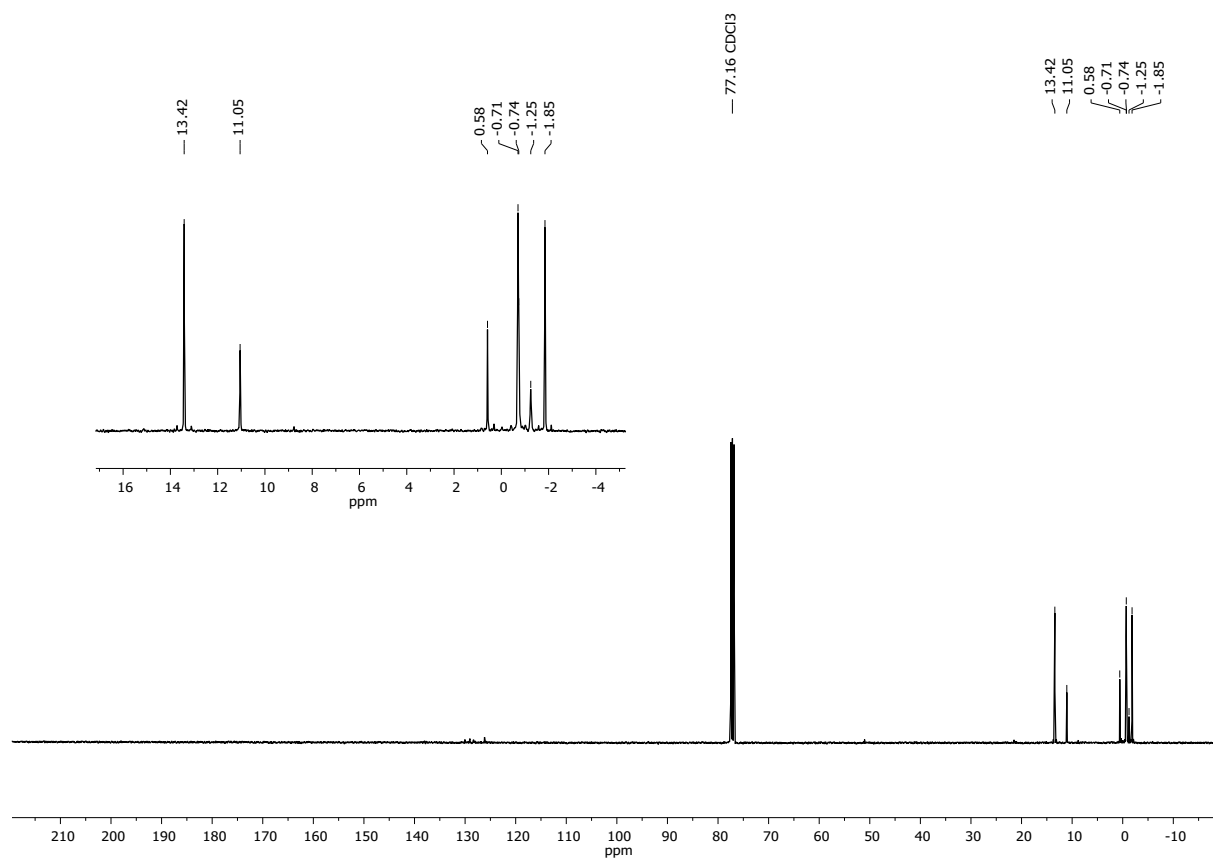

**Figure S53**  $^{13}\text{C}$  NMR (101 MHz,  $\text{CDCl}_3$ ) spectrum of mixture of hydrogen derivative products (G1-8T-24H-mix) obtained by the reduction.

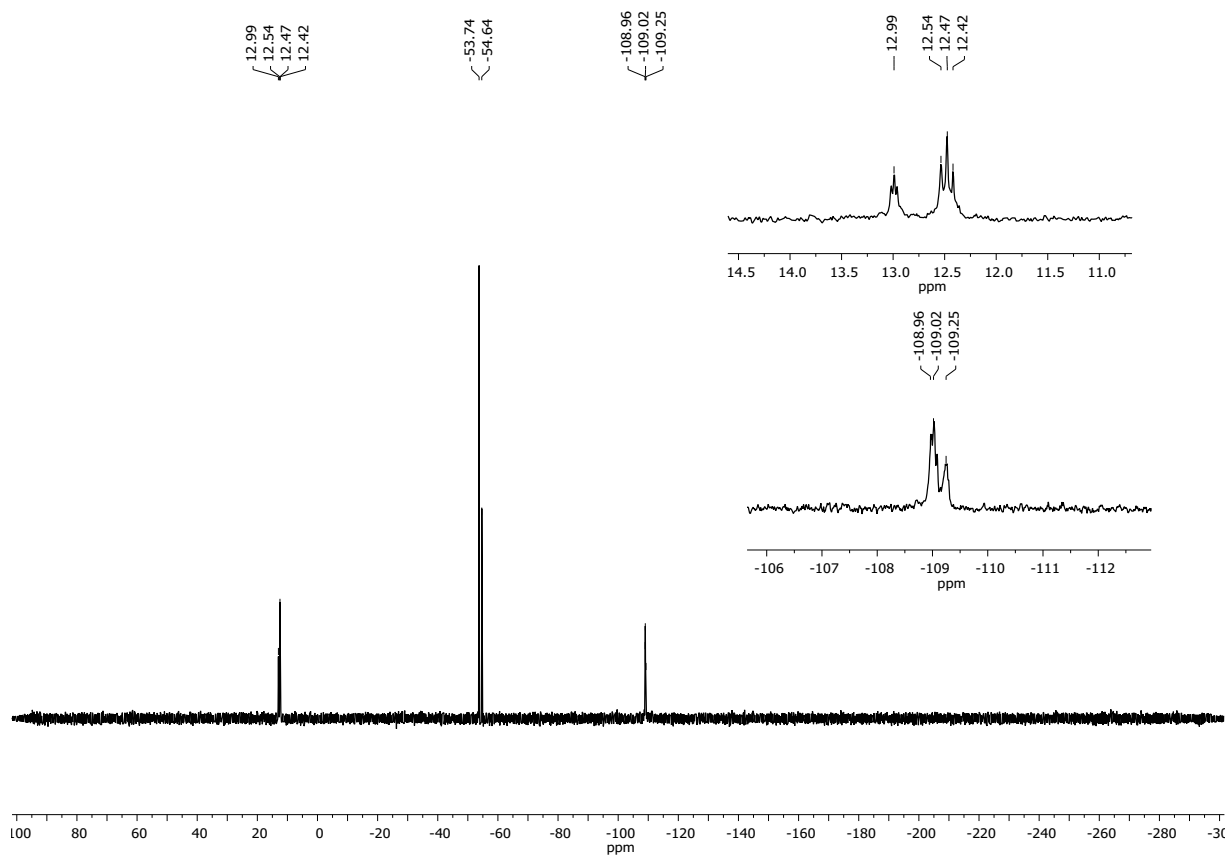

**Figure S54**  $^1\text{H}$  NMR (79.50 MHz,  $\text{CDCl}_3$ ) spectrum of mixture of hydrogen derivative (**G1-8T-24H-mix**) products obtained by the reduction.

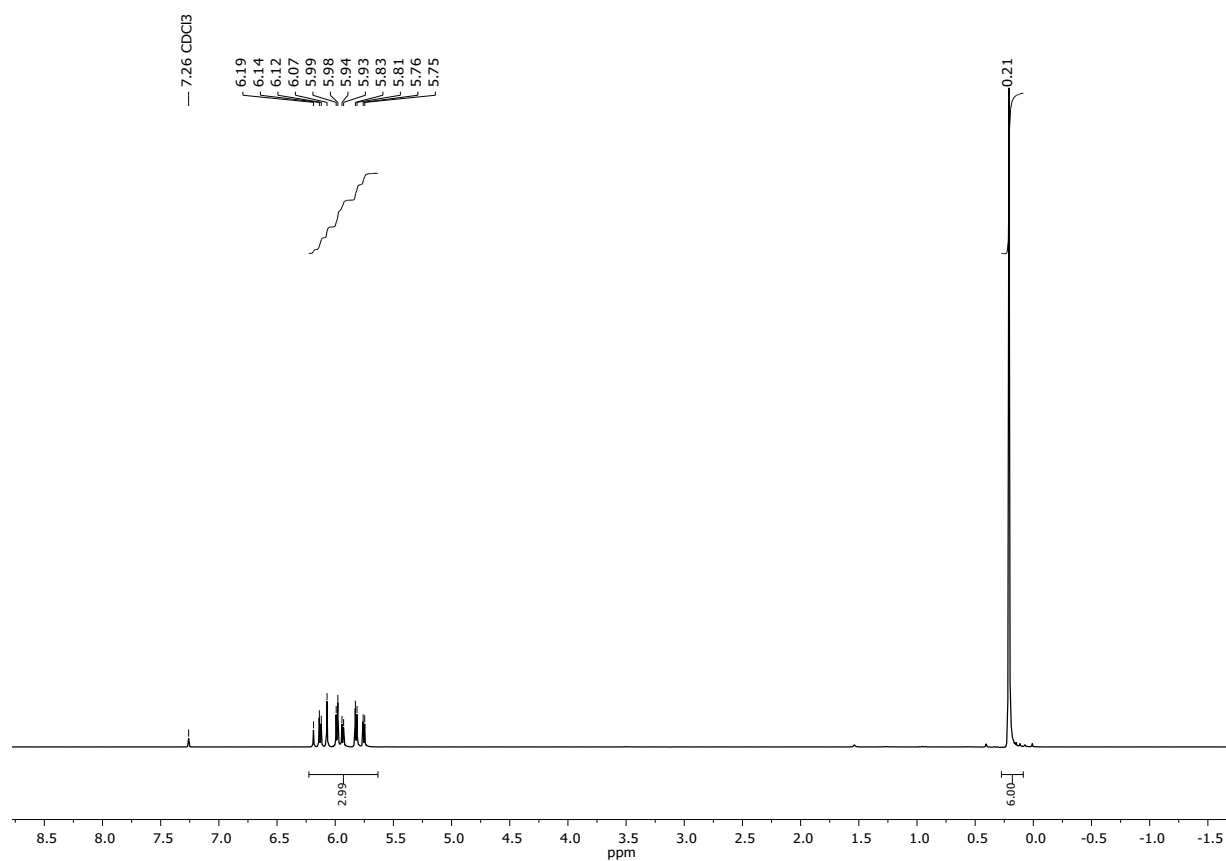

**Figure S55** <sup>1</sup>H NMR (300 MHz, CDCl<sub>3</sub>) spectrum of octavinyl spherosilicate. (GPC:  $M_w = 1359$ ;  $M_n = 1253$ ;  $D = 1.08$ )

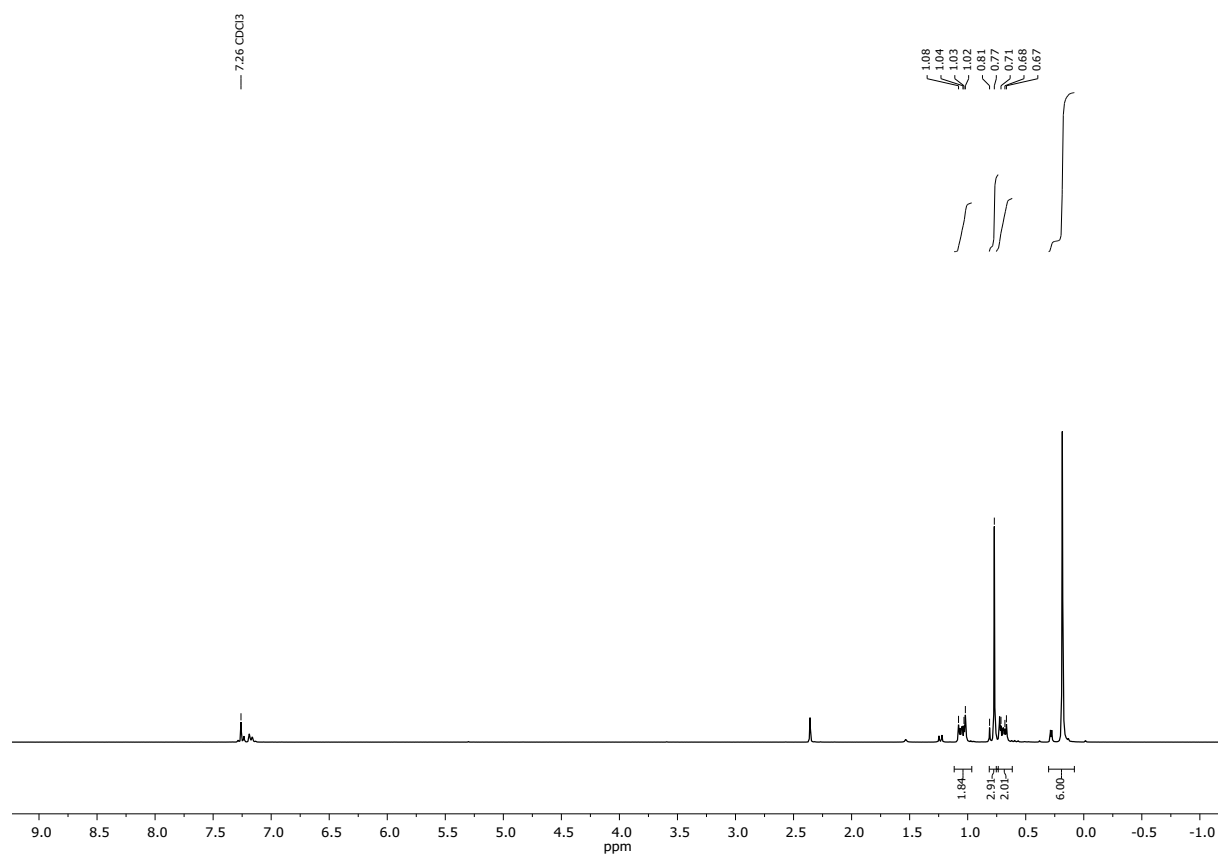

**Figure S56** <sup>1</sup>H NMR (300 MHz, CDCl<sub>3</sub>) spectrum of **G1-8T-16Cl**.

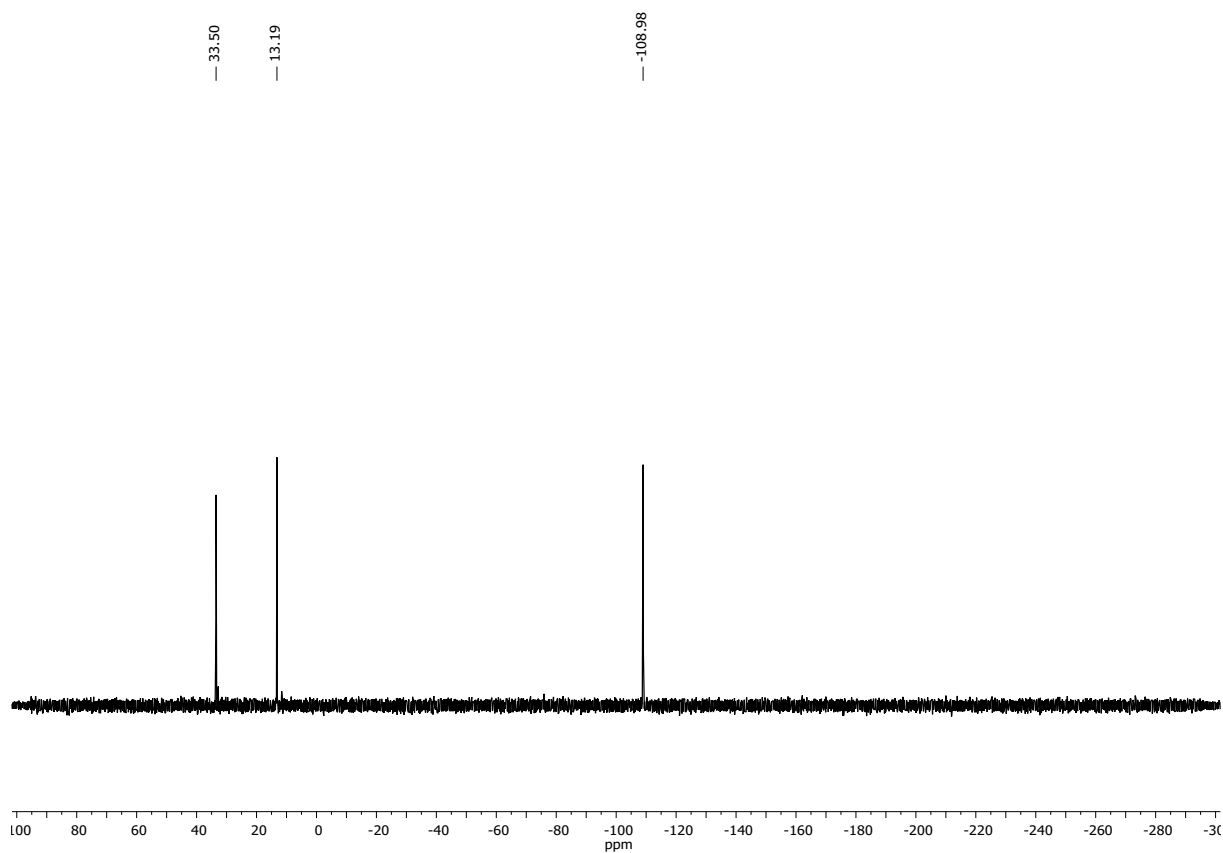

**Figure S57** <sup>29</sup>Si NMR (79.50 MHz, CDCl<sub>3</sub>) spectrum of **G1-8T-16Cl**.



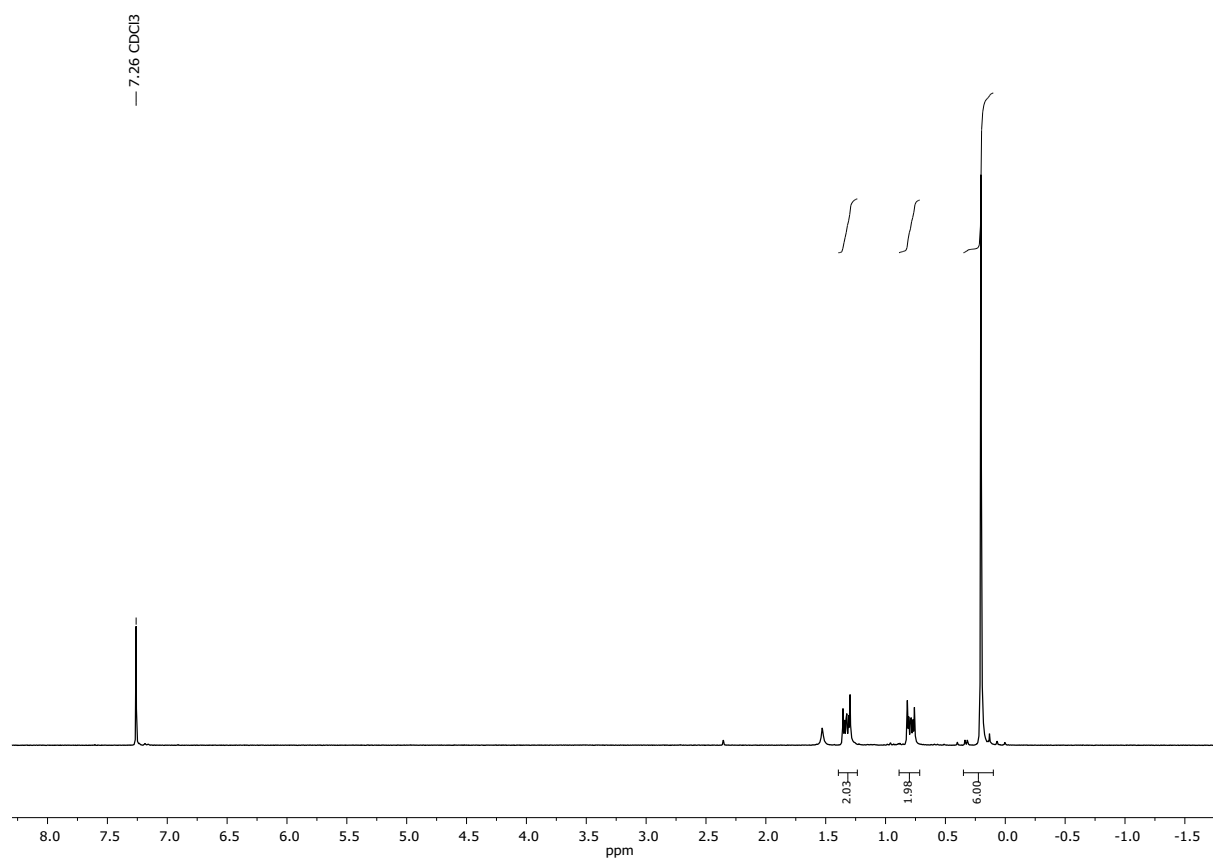

**Figure S58** <sup>1</sup>H NMR (300 MHz, CDCl<sub>3</sub>) spectrum of **G1-8T-24Cl**.

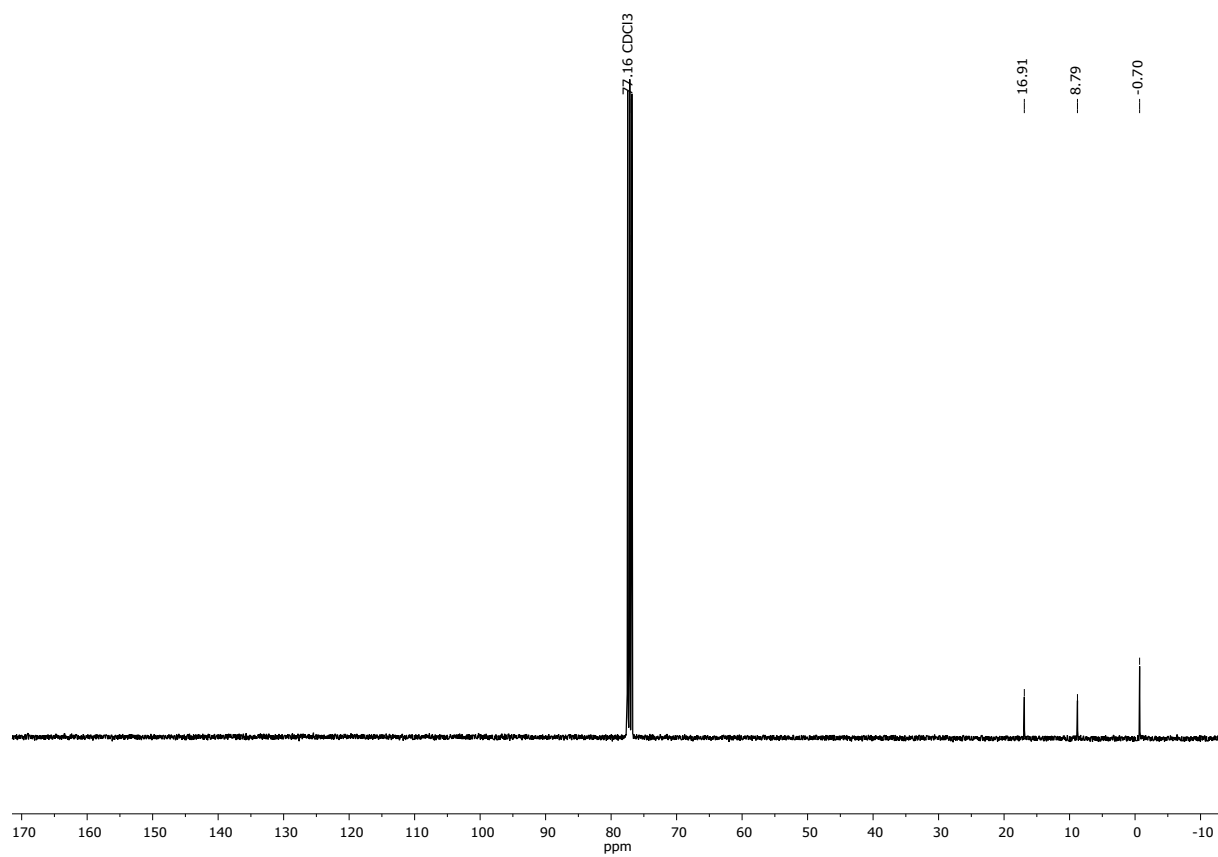

**Figure S59**  $^{13}\text{C}$  NMR (101 MHz,  $\text{CDCl}_3$ ) spectrum of **G1-8T-24Cl**.

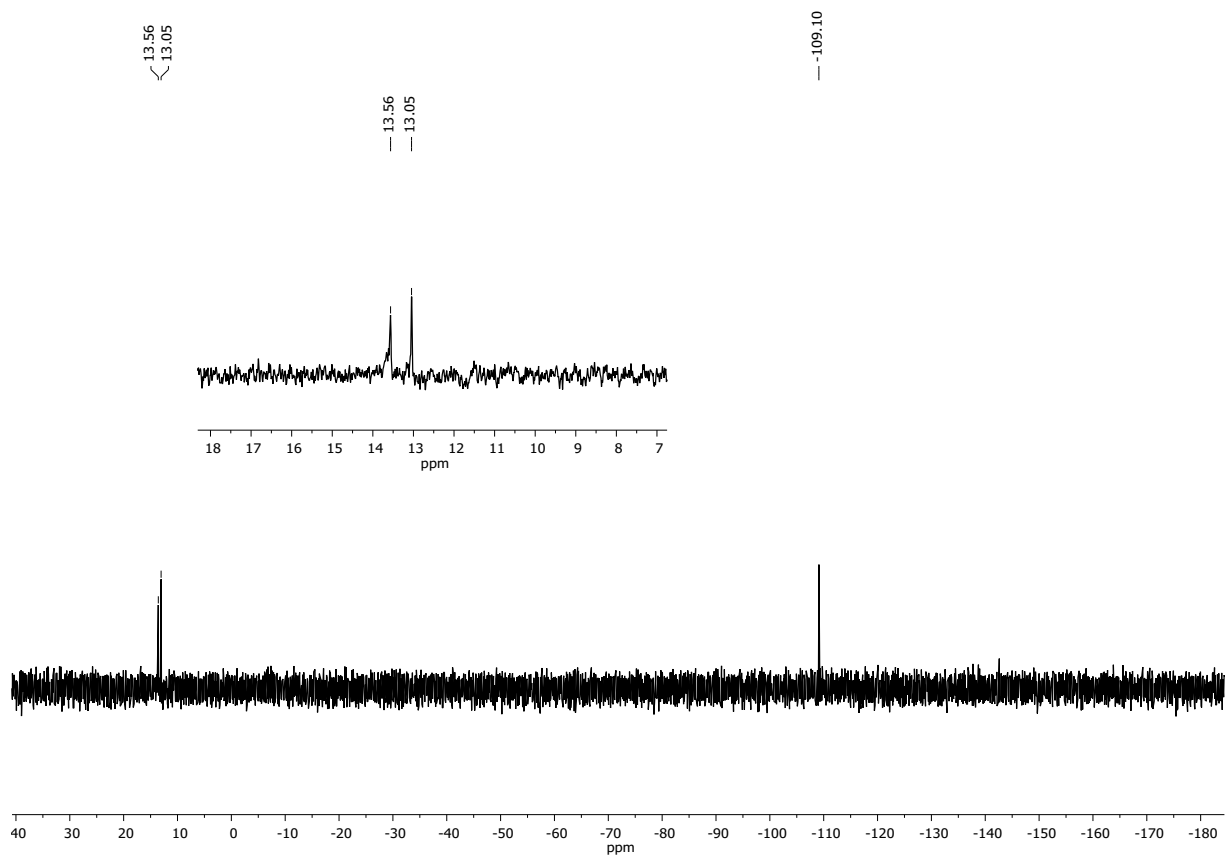

Figure S60  $^{29}\text{Si}$  NMR (79.50 MHz,  $\text{CDCl}_3$ ) spectrum of **G1-8T-24Cl**.

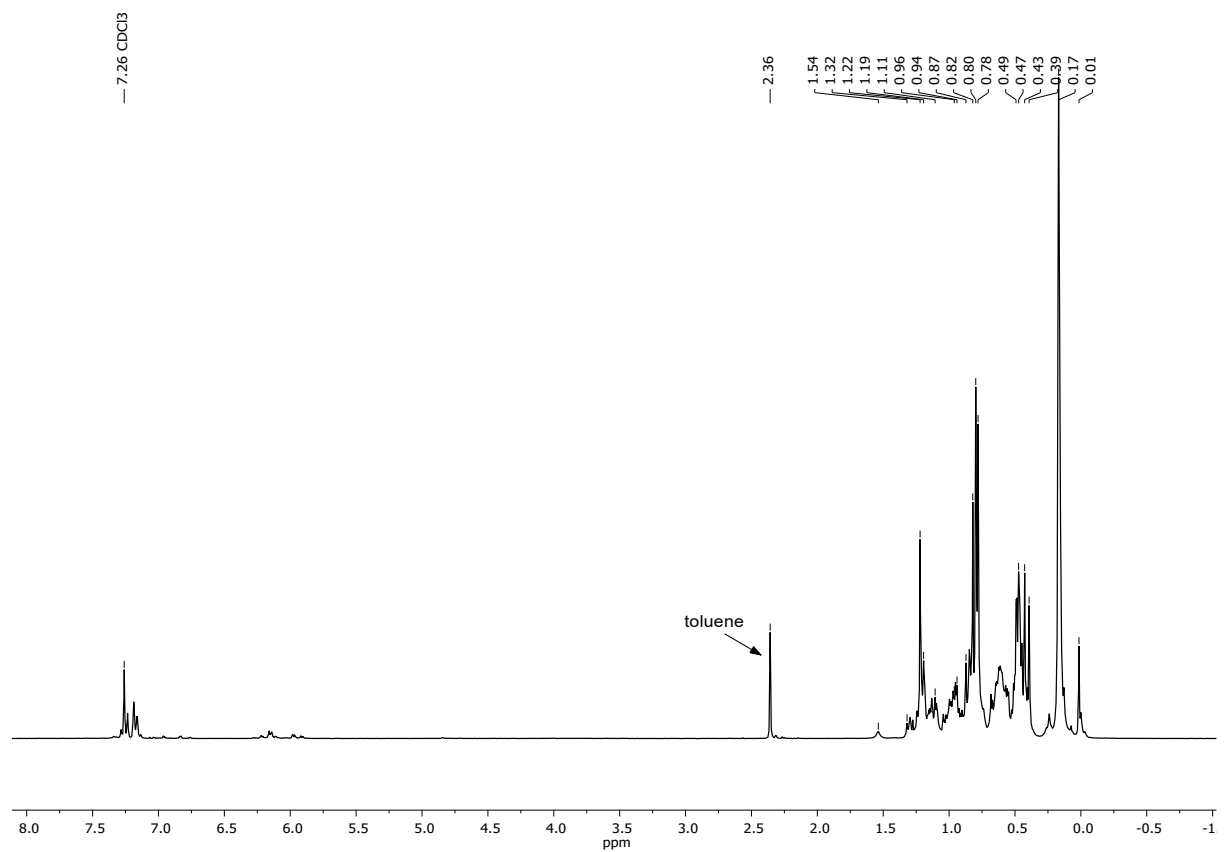

Figure S61  $^1\text{H}$  NMR (300 MHz,  $\text{CDCl}_3$ ) spectrum of reaction mixture of **G2-16T-32Cl**.

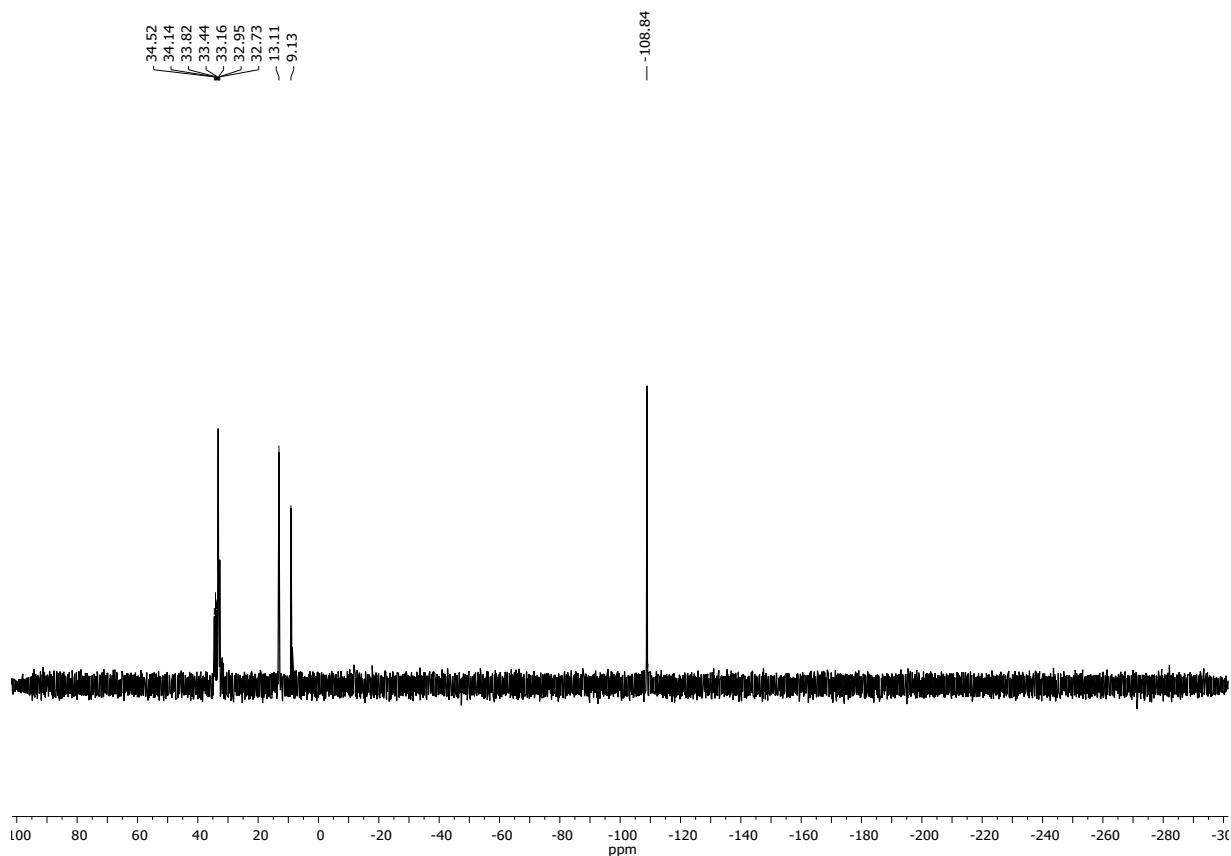

Figure S62  $^{29}\text{Si}$  NMR (79.50 MHz,  $\text{CDCl}_3$ ) spectrum of reaction mixture of G2-16T-32Cl.

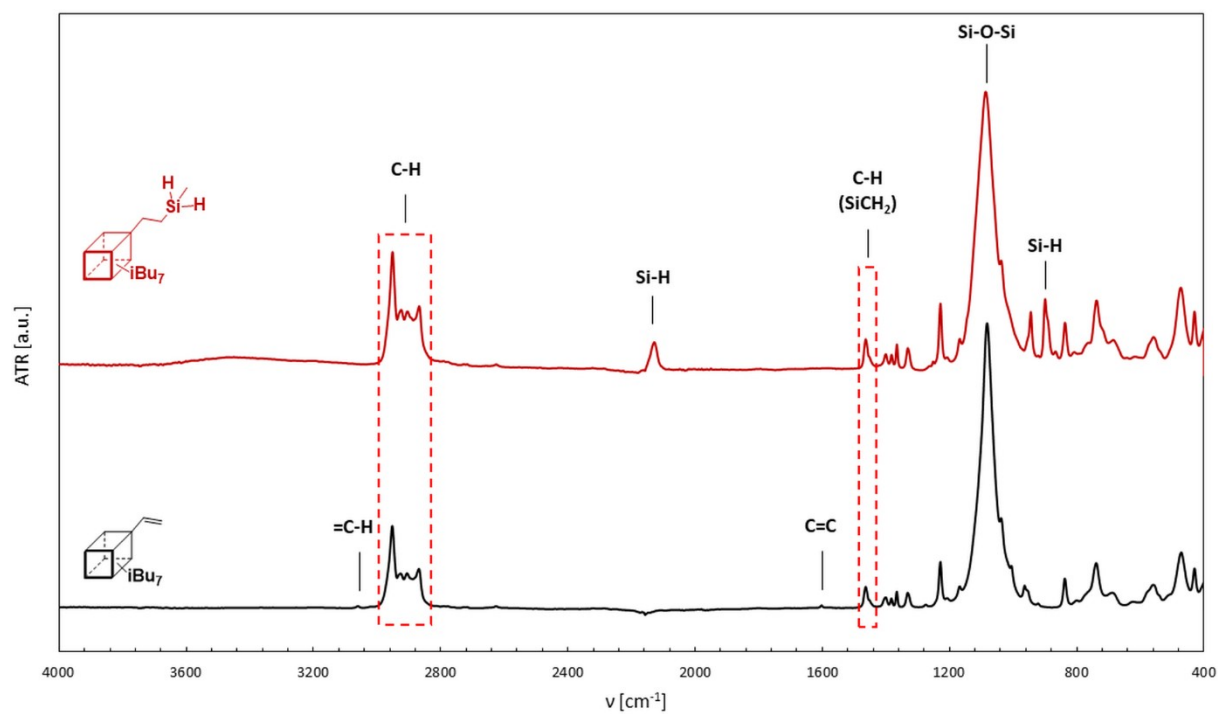

Figure S63 FT-IR stacked spectra of  $\text{iBu}_7\text{T}_8\text{-Vi}$  and  $\text{G1-1iBu-2H}$  for isolated compounds.

## 7. References:

- 1 K. Mituła, M. Dutkiewicz, B. Dudziec, B. Marciniak and K. Czaja, A Library of Monoalkenylsilsesquioxanes as Potential Comonomers for Synthesis of Hybrid Materials, *J. Therm. Anal. Calorim.*, 2018, **132**, 1545–1555.
- 2 M. Walczak, R. Januszewski, M. Majchrzak, M. Kubicki, B. Dudziec and B. Marciniak, Unusual: Cis and Trans Architecture of Dihydrofunctional Double-Decker Shaped Silsesquioxane and Synthesis of Its Ethyl Bridged  $\pi$ -Conjugated Arene Derivatives. *New J. Chem.*, , DOI:10.1039/c7nj00255f.
- 3 K. Mituła, J. Duszczyk, D. Brząkalski, B. Dudziec, M. Kubicki and B. Marciniak, Tetra-Functional Double-Decker Silsesquioxanes as Anchors for Reactive Functional Groups and Potential Synthons for Hybrid Materials. *Chem. Commun.*, 2017, **53**, 10370–10373.
- 4 D. Brząkalski, M. Walczak, J. Duszczyk, B. Dudziec and B. Marciniak, Chlorine-Free Catalytic Formation of Silsesquioxanes with Si-OH and Si-OR Functional Groups. *Eur. J. Inorg. Chem.*, 2018, 4905–4910.
- 5 R. Januszewski, M. Dutkiewicz and I. Kownacki, *Mater. Des.*, An efficient methodology for the synthesis of unique functional polyolefins. 2021, **206**, 109801.
- 6 Technologies Agilent, *CrysAlis PRO (Version 1.171.39.46)*, 2018.
- 7 G. M. Sheldrick, SHELXT - Integrated space-group and crystal-structure determination. *Acta Crystallogr. Sect. A Found. Crystallogr.*, 2015, **71**, 3–8.
- 8 G. M. Sheldrick, Crystal structure refinement with SHELXL. *Acta Crystallogr. Sect. C Struct. Chem.*, 2015, **71**, 3–8.
